# Supplementary material for: Genetic diversity of Venturia inaequalis isolates from the scabs in apple trees in Gansu Province, China, using AFLP markers
Source: PeerJ journal article supplement (doi:10.7717/peerj.14512), 2022-12-16
Supplement: Peer_J_data.zip [file Fig 4.xlsx]

## Sheet: GD
151	108	6	21	23	16	9	13	26	1	108
	0-1	Codominant Genotypic Distance	PLJN	TSMJ	PLJC	QYXF	PLLT	QYNX
PLJN	PLJN	PLJN	PLJN	PLJN	PLJN	PLJN	PLJN	PLJN	PLJN	PLJN	PLJN	PLJN	PLJN	PLJN	PLJN	PLJN	PLJN	PLJN	PLJN	PLJN	TSMJ	TSMJ	TSMJ	TSMJ	TSMJ	TSMJ	TSMJ	TSMJ	TSMJ	TSMJ	TSMJ	TSMJ	TSMJ	TSMJ	TSMJ	TSMJ	TSMJ	TSMJ	TSMJ	TSMJ	TSMJ	TSMJ	TSMJ	PLJC	PLJC	PLJC	PLJC	PLJC	PLJC
0	40	44	92	92	71	73	65	65	110	50	55	69	96	62	72	47	53	79	47	22	27	37	65	56	41	61	56	53	52	47	47	38	47	56	65	64	59	61	40	54	55	38	30	35	45	55	42	59	52
40	0	62	84	106	59	63	75	77	96	68	61	75	100	72	64	61	61	95	55	46	47	49	71	62	51	67	60	55	58	67	57	44	67	62	69	68	59	61	60	62	55	44	48	51	61	57	56	71	64
44	62	0	100	110	71	69	85	87	122	72	63	81	106	76	80	69	49	97	55	56	57	69	97	80	67	87	60	75	76	71	69	62	73	90	77	82	79	91	64	76	79	66	60	69	69	73	66	91	82
92	84	100	0	174	101	89	73	125	148	120	85	99	142	104	80	107	101	147	81	96	97	93	115	110	93	109	98	95	102	111	105	106	109	106	115	100	103	101	102	110	103	94	104	95	101	97	100	121	106
92	106	110	174	0	143	139	121	111	86	110	125	117	90	110	124	109	115	65	107	94	105	111	129	104	107	115	114	103	104	111	91	102	119	102	117	114	107	113	102	110	117	112	98	105	111	115	100	117	108
71	59	71	101	143	0	108	96	84	119	87	82	98	111	97	95	76	76	120	72	81	82	88	98	89	82	90	91	90	89	82	88	71	92	97	114	83	88	108	87	105	86	79	87	80	86	88	79	104	95
73	63	69	89	139	108	0	120	108	123	73	78	110	125	103	87	94	74	126	74	79	68	76	92	97	82	86	79	88	79	86	86	79	92	79	96	75	98	88	87	85	90	79	73	78	88	94	81	94	89
65	75	85	73	121	96	120	0	112	139	91	90	64	133	81	73	88	84	102	76	65	72	74	88	83	62	104	83	86	89	84	70	75	76	85	90	91	80	82	77	91	86	79	79	70	70	70	73	94	73
65	77	87	125	111	84	108	112	0	151	89	96	106	109	87	103	82	94	108	80	73	78	86	102	103	84	100	93	86	91	90	90	81	90	87	110	101	96	116	83	97	98	81	81	86	90	106	79	96	93
110	96	122	148	86	119	123	139	151	0	144	121	143	98	136	126	123	113	103	103	114	109	107	133	108	107	121	116	107	98	107	107	112	125	112	111	114	107	113	112	126	105	110	108	103	119	109	110	119	112
50	68	72	120	110	87	73	91	89	144	0	83	101	106	92	100	81	67	103	69	58	63	75	85	76	73	83	78	87	76	69	77	66	75	70	83	74	91	79	72	84	87	74	70	71	71	85	64	81	76
55	61	63	85	125	82	78	90	96	121	83	0	112	121	79	89	72	76	110	56	67	66	78	88	87	68	102	79	86	83	84	70	73	84	83	98	79	96	82	71	85	74	75	73	74	80	82	83	92	75
69	75	81	99	117	98	110	64	106	143	101	112	0	147	111	65	78	84	116	82	65	78	86	100	83	86	100	81	94	75	96	88	71	90	91	88	99	88	90	83	95	96	83	73	82	80	94	77	98	101
96	100	106	142	90	111	125	133	109	98	106	121	147	0	156	120	127	123	65	111	108	97	107	129	110	107	105	100	117	110	107	109	98	115	104	109	114	117	117	110	110	121	104	102	97	105	109	102	119	102
62	72	76	104	110	97	103	81	87	136	92	79	111	156	0	116	75	77	111	65	70	75	69	107	82	75	103	84	87	90	99	73	84	77	90	111	88	87	89	70	92	85	76	80	73	89	81	88	87	94
72	64	80	80	124	95	87	73	103	126	100	89	65	120	116	0	103	93	131	85	84	79	87	101	106	77	113	78	93	84	85	95	82	97	94	83	106	89	93	90	84	103	84	76	87	85	93	86	99	92
47	61	69	107	109	76	94	88	82	123	81	72	78	127	75	103	0	80	98	58	45	58	64	90	71	68	86	75	68	69	82	68	65	80	77	92	89	76	76	67	81	70	67	59	64	64	70	63	78	79
53	61	49	101	115	76	74	84	94	113	67	76	84	123	77	93	80	0	108	64	53	56	60	88	73	60	80	65	74	71	68	68	47	66	69	80	73	70	70	61	81	60	59	61	58	68	76	63	82	67
79	95	97	147	65	120	126	102	108	103	103	110	116	65	111	131	98	108	0	104	79	98	100	118	101	96	106	101	116	111	116	88	101	106	99	118	117	110	118	91	125	112	105	107	96	98	110	97	112	103
47	55	55	81	107	72	74	76	80	103	69	56	82	111	65	85	58	64	104	0	41	54	68	90	73	62	88	57	64	69	70	66	59	70	79	80	67	66	82	75	71	74	59	57	56	66	70	63	80	71
22	46	56	96	94	81	79	65	73	114	58	67	65	108	70	84	45	53	79	41	0	33	49	75	56	43	61	68	57	60	57	57	42	55	66	73	68	65	63	50	68	59	44	44	41	51	59	44	67	56
27	47	57	97	105	82	68	72	78	109	63	66	78	97	75	79	58	56	98	54	33	0	34	54	53	40	44	45	50	37	44	38	25	40	47	56	45	40	50	35	49	48	17	23	18	38	46	31	60	33
37	49	69	93	111	88	76	74	86	107	75	78	86	107	69	87	64	60	100	68	49	34	0	64	49	40	54	53	38	47	46	42	35	42	39	68	51	48	44	39	47	28	43	23	38	46	46	45	52	55
65	71	97	115	129	98	92	88	102	133	85	88	100	129	107	101	90	88	118	90	75	54	64	0	103	56	70	69	76	61	76	56	59	60	71	86	57	70	68	69	65	58	61	63	54	68	72	65	90	73
56	62	80	110	104	89	97	83	103	108	76	87	83	110	82	106	71	73	101	73	56	53	49	103	0	61	73	72	53	60	65	51	52	73	50	77	70	61	69	54	76	55	50	46	49	57	49	62	61	62
41	51	67	93	107	82	82	62	84	107	73	68	86	107	75	77	68	60	96	62	43	40	40	56	61	0	66	57	52	51	48	38	43	50	49	68	53	58	56	53	53	44	45	37	38	50	54	53	58	49
61	67	87	109	115	90	86	104	100	121	83	102	100	105	103	113	86	80	106	88	61	44	54	70	73	66	0	87	50	69	64	66	47	66	71	68	59	70	58	57	61	64	49	57	52	66	68	51	82	61
56	60	60	98	114	91	79	83	93	116	78	79	81	100	84	78	75	65	101	57	68	45	53	69	72	57	87	0	75	58	63	59	50	69	66	67	58	61	59	64	64	59	48	44	49	59	67	60	63	64
53	55	75	95	103	90	88	86	86	107	87	86	94	117	87	93	68	74	116	64	57	50	38	76	53	52	50	75	0	55	56	52	49	58	57	58	61	54	58	55	47	52	43	35	54	56	44	53	66	61
52	58	76	102	104	89	79	89	91	98	76	83	75	110	90	84	69	71	111	69	60	37	47	61	60	51	69	58	55	0	67	45	48	67	46	67	50	47	55	58	56	45	40	38	35	47	51	42	75	56
47	67	71	111	111	82	86	84	90	107	69	84	96	107	99	85	82	68	116	70	57	44	46	76	65	48	64	63	56	67	0	62	43	56	63	74	61	62	64	59	55	50	55	33	54	64	66	53	54	53
47	57	69	105	91	88	86	70	90	107	77	70	88	109	73	95	68	68	88	66	57	38	42	56	51	38	66	59	52	45	62	0	45	56	47	68	59	52	58	45	51	44	45	39	40	44	50	47	66	45
38	44	62	106	102	71	79	75	81	112	66	73	71	98	84	82	65	47	101	59	42	25	35	59	52	43	47	50	49	48	43	45	0	51	46	71	50	45	43	46	48	47	28	30	39	53	55	38	61	44
47	67	73	109	119	92	92	76	90	125	75	84	90	115	77	97	80	66	106	70	55	40	42	60	73	50	66	69	58	67	56	56	51	0	69	76	59	64	56	51	57	62	51	41	40	58	58	51	72	63
56	62	90	106	102	97	79	85	87	112	70	83	91	104	90	94	77	69	99	79	66	47	39	71	50	49	71	66	57	46	63	47	46	69	0	89	58	59	63	48	54	51	48	38	47	49	63	54	67	50
65	69	77	115	117	114	96	90	110	111	83	98	88	109	111	83	92	80	118	80	73	56	68	86	77	68	68	67	58	67	74	68	71	76	89	0	91	74	66	75	77	70	67	57	62	66	66	61	80	71
64	68	82	100	114	83	75	91	101	114	74	79	99	114	88	106	89	73	117	67	68	45	51	57	70	53	59	58	61	50	61	59	50	59	58	91	0	69	69	68	68	59	40	50	47	65	67	66	81	64
59	59	79	103	107	88	98	80	96	107	91	96	88	117	87	89	76	70	110	66	65	40	48	70	61	58	70	61	54	47	62	52	45	64	59	74	69	0	76	53	59	50	41	43	36	54	56	53	80	49
61	61	91	101	113	108	88	82	116	113	79	82	90	117	89	93	76	70	118	82	63	50	44	68	69	56	58	59	58	55	64	58	43	56	63	66	69	76	0	69	57	52	57	45	58	66	64	59	70	61
40	60	64	102	102	87	87	77	83	112	72	71	83	110	70	90	67	61	91	75	50	35	39	69	54	53	57	64	55	58	59	45	46	51	48	75	68	53	69	0	64	55	42	46	37	47	59	54	71	48
54	62	76	110	110	105	85	91	97	126	84	85	95	110	92	84	81	81	125	71	68	49	47	65	76	53	61	64	47	56	55	51	48	57	54	77	68	59	57	64	0	63	50	36	57	57	59	58	67	58
55	55	79	103	117	86	90	86	98	105	87	74	96	121	85	103	70	60	112	74	59	48	28	58	55	44	64	59	52	45	50	44	47	62	51	70	59	50	52	55	63	0	53	33	42	52	48	49	66	53
38	44	66	94	112	79	79	79	81	110	74	75	83	104	76	84	67	59	105	59	44	17	43	61	50	45	49	48	43	40	55	45	28	51	48	67	40	41	57	42	50	53	0	30	25	45	49	44	61	42
30	48	60	104	98	87	73	79	81	108	70	73	73	102	80	76	59	61	107	57	44	23	23	63	46	37	57	44	35	38	33	39	30	41	38	57	50	43	45	46	36	33	30	0	33	41	45	36	51	46
35	51	69	95	105	80	78	70	86	103	71	74	82	97	73	87	64	58	96	56	41	18	38	54	49	38	52	49	54	35	54	40	39	40	47	62	47	36	58	37	57	42	25	33	0	32	38	37	58	31
45	61	69	101	111	86	88	70	90	119	71	80	80	105	89	85	64	68	98	66	51	38	46	68	57	50	66	59	56	47	64	44	53	58	49	66	65	54	66	47	57	52	45	41	32	0	50	37	72	43
55	57	73	97	115	88	94	70	106	109	85	82	94	109	81	93	70	76	110	70	59	46	46	72	49	54	68	67	44	51	66	50	55	58	63	66	67	56	64	59	59	48	49	45	38	50	0	53	58	59
42	56	66	100	100	79	81	73	79	110	64	83	77	102	88	86	63	63	97	63	44	31	45	65	62	53	51	60	53	42	53	47	38	51	54	61	66	53	59	54	58	49	44	36	37	37	53	0	75	44
59	71	91	121	117	104	94	94	96	119	81	92	98	119	87	99	78	82	112	80	67	60	52	90	61	58	82	63	66	75	54	66	61	72	67	80	81	80	70	71	67	66	61	51	58	72	58	75	0	73
52	64	82	106	108	95	89	73	93	112	76	75	101	102	94	92	79	67	103	71	56	33	55	73	62	49	61	64	61	56	53	45	44	63	50	71	64	49	61	48	58	53	42	46	31	43	59	44	73	0
57	65	85	99	111	94	94	80	98	113	83	80	104	115	85	103	80	76	106	70	59	50	48	54	79	50	68	69	58	57	66	56	47	52	65	76	65	68	50	65	67	52	57	49	52	64	58	51	82	67
70	88	88	104	126	103	93	99	115	118	100	97	101	110	92	96	95	83	111	81	80	63	67	99	82	77	83	68	81	64	89	75	74	81	84	77	78	71	83	68	92	77	64	68	53	47	73	70	77	74
45	63	71	107	103	86	88	78	82	117	69	82	88	103	75	91	64	68	100	64	55	38	46	66	55	44	54	61	50	53	56	40	43	48	49	58	69	54	50	57	45	54	43	39	32	36	44	41	52	43
62	64	84	104	108	93	93	71	109	118	80	81	99	110	86	106	83	73	105	69	62	37	59	69	66	59	75	68	63	56	59	51	44	55	62	83	64	51	59	58	68	61	44	46	43	59	67	52	79	58
79	87	87	137	123	112	112	98	114	145	103	106	100	125	131	109	112	86	118	98	83	78	80	110	79	78	100	91	74	85	88	80	79	88	83	88	99	84	98	85	75	86	81	75	82	56	72	75	92	83
56	72	80	98	112	97	83	87	85	124	72	91	95	118	82	88	83	69	109	73	56	39	51	73	68	61	67	68	53	44	71	53	60	57	56	67	66	57	75	48	72	59	50	48	39	53	51	48	79	58
50	56	76	96	120	81	81	79	95	114	64	79	95	100	86	90	71	65	111	69	54	41	51	73	58	53	51	70	57	42	61	55	48	63	64	69	60	55	59	58	60	53	42	54	33	41	49	40	75	38
60	78	96	118	128	103	95	93	103	124	92	89	113	122	98	100	77	85	117	89	68	47	59	75	72	63	85	68	79	62	67	55	64	63	60	95	66	71	71	60	74	57	58	52	41	43	57	60	75	48
37	51	65	99	95	82	84	68	84	107	65	76	86	91	79	81	66	66	98	54	45	26	42	66	57	48	58	55	50	41	54	46	41	50	55	56	55	42	64	45	53	56	31	39	16	32	36	37	56	39
40	52	60	96	106	83	79	71	89	108	70	73	85	96	76	92	65	57	95	59	42	23	43	59	58	39	51	52	55	40	53	37	40	47	56	51	54	49	53	42	56	45	36	40	17	31	41	38	63	36
47	53	69	107	109	86	80	80	82	117	69	86	88	101	85	93	70	64	102	62	49	32	40	62	65	46	54	53	50	43	60	46	45	48	59	68	53	48	62	51	57	50	41	43	20	34	46	41	62	43
47	65	75	113	123	86	88	82	94	119	71	90	90	109	97	87	80	76	108	80	53	40	58	80	71	54	70	75	70	51	66	56	57	64	67	66	71	68	76	59	69	60	45	49	42	38	56	47	76	51
60	60	76	88	106	85	95	63	97	108	84	79	83	104	80	90	81	63	103	65	60	41	55	69	56	45	55	60	51	58	65	45	42	61	56	61	58	55	55	52	62	57	42	52	37	47	41	58	63	44
70	90	94	140	122	103	109	107	101	126	80	99	105	108	108	108	83	91	113	91	74	65	77	93	92	79	97	86	85	70	81	87	76	69	90	83	90	81	81	86	88	81	76	70	71	77	77	70	77	82
75	79	87	99	125	118	86	94	118	121	113	100	112	131	89	111	104	76	118	80	83	64	60	96	77	66	88	79	64	69	66	64	69	80	73	98	79	58	88	63	69	66	63	65	56	70	72	75	78	65
90	94	106	130	112	115	119	105	117	118	84	105	119	136	116	120	105	97	133	101	92	81	81	93	80	85	93	100	69	84	93	77	88	83	74	77	94	91	89	88	98	81	84	76	83	69	71	72	91	88
70	82	86	120	132	87	117	77	107	128	96	99	107	104	106	94	85	93	109	93	72	63	69	93	78	65	85	76	81	78	83	81	74	71	84	89	88	83	79	72	90	77	70	74	59	73	59	70	85	76
65	69	85	115	119	98	94	98	102	121	79	80	110	119	103	105	86	78	114	72	61	48	68	82	73	66	82	75	60	51	80	58	61	82	59	80	73	70	78	65	75	66	53	59	50	36	60	51	78	51
33	49	57	95	99	78	74	68	88	111	63	74	78	93	75	83	66	48	98	54	41	22	34	60	53	42	50	47	48	43	46	38	31	44	49	54	53	42	54	43	49	42	35	31	18	34	36	33	52	35
37	55	65	105	113	80	86	74	86	123	77	76	90	107	81	89	68	62	104	62	43	28	52	64	63	42	58	59	56	47	60	44	43	46	67	66	63	50	70	45	61	54	33	39	18	40	38	41	60	45
44	56	64	102	100	91	83	69	91	120	76	81	81	104	80	86	65	67	107	57	50	31	41	71	58	49	65	56	51	50	51	45	36	57	56	63	66	41	61	52	48	53	40	34	33	41	45	36	55	48
52	62	74	116	120	83	99	85	97	110	78	81	101	116	94	90	73	63	119	69	54	39	55	69	76	57	67	74	57	54	61	55	50	57	72	65	72	47	71	62	62	55	48	48	33	43	37	44	71	44
63	71	79	111	107	94	80	84	98	105	79	94	88	117	91	93	84	72	118	76	65	50	50	76	63	60	64	71	66	61	54	56	41	64	59	74	67	58	62	61	73	52	57	51	48	62	66	47	76	61
60	60	76	102	120	89	89	83	99	120	80	89	93	122	88	102	71	73	107	79	64	47	65	75	66	53	81	66	69	46	73	59	60	79	66	85	70	63	71	70	78	63	52	60	51	51	59	62	77	60
69	83	97	107	117	108	102	92	98	131	81	90	120	113	101	101	98	84	116	92	83	74	70	76	89	68	84	81	60	77	78	70	71	76	65	80	91	80	68	79	67	76	73	71	66	66	64	65	74	67
55	63	79	107	113	96	92	88	96	105	93	96	98	109	83	89	82	84	108	70	61	38	48	90	69	46	68	67	58	53	68	62	57	62	69	74	67	58	80	61	71	68	51	47	46	54	60	59	76	71
70	76	74	110	118	99	89	89	101	126	82	81	99	112	94	98	83	71	107	75	72	55	69	79	78	73	75	68	75	56	85	59	60	73	70	79	76	65	75	72	76	67	56	64	45	49	51	60	85	60
60	76	72	100	110	85	81	89	95	114	72	81	103	96	96	106	77	75	93	63	56	47	61	77	76	51	75	52	77	60	59	59	56	75	64	81	54	69	77	66	78	61	54	56	51	63	67	60	71	62
62	66	88	98	120	89	93	77	105	112	94	87	87	114	94	96	79	69	117	67	70	59	65	85	70	63	73	74	63	62	63	69	62	79	76	77	74	67	75	66	70	61	62	58	57	53	53	64	69	66
47	57	71	119	95	90	88	78	98	115	77	90	84	99	87	93	66	70	96	68	51	38	50	68	57	60	64	65	52	51	58	50	47	50	63	66	65	54	58	57	67	56	49	37	34	36	40	41	72	53
49	69	73	101	107	82	100	80	92	121	85	84	90	101	87	93	76	74	108	74	55	38	52	78	57	54	60	69	58	61	58	50	47	60	59	64	77	60	68	51	65	58	47	45	32	44	44	43	60	45
34	52	60	92	104	81	79	65	89	108	72	71	79	104	74	86	59	57	101	45	34	25	45	63	58	43	59	56	53	50	51	41	38	51	58	61	64	49	59	48	54	49	36	34	23	41	31	38	59	40
27	47	59	99	99	76	82	60	82	105	65	66	82	103	67	81	58	56	92	52	37	22	30	52	47	40	58	49	46	41	40	36	35	38	47	60	53	36	54	35	51	34	31	29	14	32	34	35	52	31
33	49	61	101	105	72	78	66	82	107	67	70	78	99	73	79	56	52	98	54	31	22	36	62	47	38	54	55	50	41	52	44	31	48	53	56	57	42	60	45	57	42	31	33	24	38	36	29	54	41
58	72	74	102	130	93	93	83	101	124	90	89	95	114	86	92	83	67	119	71	64	45	55	71	70	61	73	62	63	48	71	57	62	57	70	65	72	63	65	66	64	57	48	48	37	39	45	52	57	56
45	61	71	111	117	86	90	76	98	117	75	78	90	117	87	93	74	72	110	62	47	36	46	72	59	52	66	73	58	51	58	48	49	54	61	78	65	56	76	53	67	56	47	47	30	36	44	45	66	53
47	57	79	117	105	94	94	84	96	111	79	80	86	105	97	97	72	68	106	82	49	38	44	66	51	54	64	63	56	51	58	50	45	54	55	64	65	56	60	49	63	40	49	37	32	36	40	47	58	47
58	58	72	96	108	93	73	87	91	114	74	75	99	104	86	92	81	75	99	65	62	45	55	73	70	51	63	42	63	56	63	51	48	77	52	87	52	59	63	62	60	55	44	50	47	55	55	54	67	54
46	68	76	100	100	93	93	71	87	118	78	91	85	104	80	100	65	75	95	65	46	35	49	73	56	55	57	70	53	56	59	51	46	53	58	79	70	39	73	46	62	61	44	46	31	41	47	48	69	38
49	61	79	89	105	84	88	68	80	109	77	82	84	97	69	87	72	64	88	64	55	38	44	74	61	46	66	49	66	55	66	46	45	52	63	64	63	54	60	59	71	56	45	51	36	56	56	41	62	57
50	64	72	100	124	89	85	73	95	108	84	85	87	116	86	86	77	75	113	67	60	41	49	67	56	51	73	64	57	52	59	47	54	45	58	73	66	51	71	54	60	57	44	40	37	39	49	48	69	60
63	69	87	107	125	92	92	86	106	123	93	82	106	117	91	105	72	72	110	78	51	44	54	80	59	62	64	83	60	53	78	52	59	72	57	82	73	58	68	57	75	56	49	61	40	44	52	51	80	47
51	65	77	123	103	90	90	78	92	113	63	84	94	111	95	95	70	66	106	72	57	42	62	64	69	64	70	67	62	57	66	62	53	66	65	58	71	60	68	67	73	64	53	53	38	48	46	47	64	51
51	65	69	95	105	94	86	76	94	113	77	80	86	95	81	95	68	76	98	70	55	44	50	74	59	48	64	69	54	47	60	50	55	60	61	58	69	60	62	55	63	52	51	43	36	42	40	51	64	57
52	62	70	90	104	87	81	75	95	114	80	81	91	114	76	96	65	71	103	63	52	35	51	81	56	53	61	66	59	54	65	49	52	67	62	77	72	47	73	52	60	63	46	50	31	45	45	50	65	42
38	48	66	102	108	73	87	63	85	106	68	65	81	106	78	78	69	63	99	63	48	39	41	57	60	39	63	60	51	48	63	45	44	51	54	63	58	57	61	54	60	45	48	42	35	45	35	46	59	48
54	64	86	104	122	91	93	71	101	118	88	89	95	118	96	106	79	77	113	75	52	39	49	73	62	51	57	66	55	50	59	47	46	67	66	69	60	59	57	62	76	47	42	48	33	47	51	48	73	50
41	57	57	105	103	102	86	78	84	123	73	80	74	107	83	87	74	66	98	62	41	36	48	76	67	60	68	63	56	55	56	52	47	56	61	68	77	56	64	51	47	62	45	41	46	50	58	47	74	55
38	58	68	102	114	75	97	73	83	120	68	77	87	108	70	98	65	53	101	59	38	35	45	77	56	51	63	70	57	56	57	49	42	43	56	65	72	55	63	52	64	51	42	36	33	47	45	38	61	54
67	79	85	127	117	94	110	90	100	115	99	90	104	119	103	97	86	84	112	86	71	54	60	80	79	56	80	75	72	55	74	64	57	72	73	84	77	70	74	69	81	60	57	61	50	52	56	61	70	59
42	56	70	106	98	79	87	67	85	104	74	71	83	114	72	80	65	69	99	51	40	33	47	63	58	47	61	62	53	50	53	43	40	51	50	73	58	49	63	50	46	51	38	36	35	45	49	38	61	42
58	70	82	108	108	97	83	79	93	114	64	83	85	110	86	102	75	67	103	61	56	49	57	73	70	57	81	70	77	50	77	55	56	59	58	75	70	63	73	54	76	59	58	58	35	43	55	54	67	52
48	58	82	104	96	93	87	75	93	102	74	77	81	100	80	92	69	67	97	65	44	37	49	77	54	47	59	60	59	48	55	53	46	63	56	69	54	57	53	56	64	51	48	44	37	53	49	48	47	56
47	69	75	109	107	100	82	80	86	121	81	84	90	107	87	95	66	72	94	62	43	32	52	78	63	48	66	59	60	51	58	54	51	60	61	66	71	58	68	53	65	60	43	39	34	44	52	49	62	53
42	56	78	98	96	93	87	69	81	112	74	79	81	116	74	96	63	71	103	69	40	39	55	71	58	53	65	74	55	52	63	53	48	57	64	77	70	57	61	48	66	59	46	50	33	47	43	44	69	50
38	54	66	102	114	87	87	69	97	112	80	69	87	118	84	86	71	63	111	61	42	29	43	61	56	47	65	60	53	42	57	47	40	49	60	65	64	47	63	48	58	49	36	42	25	35	43	42	61	46
44	54	68	108	104	91	89	75	95	106	76	77	91	106	84	90	67	65	105	63	46	31	43	71	54	45	61	54	55	46	47	45	42	57	54	65	64	43	59	50	56	43	36	36	25	33	43	40	59	34
29	49	61	101	99	82	88	64	82	109	69	68	78	103	71	83	56	62	96	52	33	26	36	68	43	38	60	59	48	43	48	40	39	46	47	60	65	42	62	41	53	42	35	27	20	32	34	33	50	39
[truncated: 59 more columns]

## Sheet: PCoA
Principal Coordinates Analysis (PCoA)		6	21	23	16	9	13	26
PCoA via Covariance matrix with data standardization			PLJN	TSMJ	PLJC	QYXF	PLLT	QYNX
Data Sheet	GD
Data Title
No. Samples	108	No. Pops.	6
Percentage of variation explained by the first 3 axes
Axis	1	2	3
%	7.78472	4.97714	4.08097
Cum %	7.78472	12.7619	16.8428
Eigen Values by Axis and Sample Eigen Vectors
Axis No.	1	2	3	4	5	6	7	8	9	10	11	12	13	14	15	16	17	18	19	20	21	22	23	24	25	26	27	28	29	30	31	32	33	34	35	36	37	38	39	40	41	42	43	44	45	46	47	48	49
EigenValue	26.8857	17.1893	14.0943	12.8632	11.9302	11.1308	9.93998	9.91453	9.0529	8.62515	8.3081	7.92069	7.70371	7.38227	6.98556	6.75257	6.49015	6.31413	6.0598	5.73806	5.66629	5.40741	5.29718	5.17831	4.82593	4.62666	4.49544	4.42168	4.2257	4.11111	4.00643	3.89649	3.76607	3.64114	3.51744	3.45783	3.17287	3.10743	2.98478	2.84854	2.7891	2.70732	2.61351	2.47642	2.28716	2.20415	2.16196	2.13015	2.07228
PLJN	0.385292	-0.273318	0.394027	-0.613901	-0.217667	-0.0324958	-0.187459	-0.0120212	0.150586	0.125911	0.00170512	0.0708471	-0.199357	-0.0339941	-0.150281	0.123045	-0.331822	0.0324546	0.000644707	0.00206211	0.161167	-0.237258	-0.0392622	0.172592	0.0831002	-0.0226106	-0.0304226	-0.0322044	0.182785	-0.0272169	0.0419755	0.0735042	0.0265516	-0.0236314	0.218042	0.0203006	0.0517608	-0.108102	0.0659137	0.102935	-0.0440335	0.00149506	0.268603	-0.15193	0.145632	-0.14955	-0.0826487	0.111172	0.191423
PLJN	0.701955	-0.449629	-0.057593	-0.0840688	-0.00572274	0.0239948	-0.109505	-0.11907	0.311389	-0.374469	0.320986	0.26895	-0.0427222	-0.0327181	-0.0914044	0.370739	-0.0978455	-0.135227	-0.156103	0.0129645	0.0297508	-0.251964	0.211048	-0.17487	-0.277536	-0.0328761	-0.35326	-0.186612	0.195201	0.0503698	0.178982	0.443171	-0.062282	-0.0600996	0.126559	0.0379009	0.369315	0.105437	-0.250146	-0.209296	-0.164981	0.133029	-0.0415963	0.125193	-0.0965041	0.14707	-0.198996	-0.217843	-0.0980966
PLJN	0.906615	-0.450031	0.551119	-0.106403	-0.0343912	-0.178028	-0.552855	0.288421	0.388331	-0.133631	-0.0885816	0.0720724	-0.208762	-0.0515868	0.609053	-0.235684	-0.167563	0.156041	-0.54838	0.135962	-0.0654226	0.00895582	-0.0490088	-0.266429	0.41329	-0.0256966	0.40825	-0.0423405	0.0533864	-0.0393772	0.0207333	-0.286222	0.129571	-0.113624	0.22139	0.0367889	-0.0256992	0.0056125	0.0856358	0.253382	0.0528514	0.0774118	0.05888	0.0339151	-0.100158	-0.0210186	0.0850802	0.366962	-0.111128
PLJN	1.05257	-1.30271	0.0216155	1.08247	0.661261	0.285474	0.372774	0.0604813	-0.751058	-0.189292	-0.375372	0.462077	0.252662	-0.0797651	-0.228147	-0.00251484	-0.344189	-0.0677719	0.307823	-0.0454132	0.0560516	0.235537	0.234076	0.134119	-0.0405358	0.0776386	-0.096594	0.00235063	-0.14474	-0.206608	-0.151692	0.0330112	0.122219	-0.281439	0.157788	0.261238	-0.15543	0.00849826	0.295968	0.157522	0.0537169	-0.262542	0.178072	-0.121096	0.0730563	0.0391774	-0.0916469	0.018566	0.0967737
PLJN	1.36023	1.65818	-0.129338	-0.645111	0.139993	0.568183	0.248804	0.546855	-0.0943244	-0.204911	0.148659	-0.304482	-0.221173	0.268726	-0.131338	0.158277	0.310016	-0.0774781	-0.0890202	0.0299107	0.0653562	-0.00566075	-0.395066	-0.114224	-0.0780545	-0.1861	0.37385	-0.161168	0.0303364	0.108311	0.102604	-0.294449	0.035237	-0.182252	-0.150558	-0.122357	-0.0877816	-0.111456	0.222905	-0.274436	0.191612	-0.243494	0.254577	-0.160235	-0.183919	0.147543	-0.133533	0.0428631	0.0787043
PLJN	0.979141	-0.450067	0.526726	0.213747	-0.0576805	-0.488912	0.184213	-0.833656	0.590653	-0.262854	0.345827	0.76057	0.320517	0.181374	0.070297	-0.543262	0.345104	-0.199301	-0.160887	-0.339295	-0.00949081	0.277309	0.333237	-0.0307634	-0.056098	0.0101864	0.112158	-0.0678226	-0.0157215	0.459267	0.261374	-0.0673819	-0.164683	-0.217998	-0.0631304	0.186398	0.00505478	-0.264436	-0.203938	-0.121187	-0.0305882	-0.0186155	-0.283418	0.230811	-0.180493	0.00828874	0.0489602	-0.109706	0.114713
PLJN	0.881009	-0.660526	-0.411222	0.384202	0.236058	-0.795934	-0.636091	0.576261	0.11985	-0.339309	-0.278967	-0.220613	-0.0139794	-0.259075	-0.340591	0.179137	-0.174469	0.621578	0.202725	0.367473	0.252746	0.131412	-0.179978	-0.321839	0.0805839	0.200106	-0.0726386	-0.357866	-0.26969	0.0219548	0.192575	0.51944	0.00731355	0.00161447	-0.111187	-0.207185	-0.0651229	0.372682	0.0975171	-0.0775432	0.0970428	0.0729762	-0.0183017	0.224189	-0.177547	-0.0431801	-0.0809137	0.0607129	-0.0040626
PLJN	0.552614	-0.551601	0.541339	0.285769	0.021369	0.963757	0.59188	-0.210725	-0.854416	0.238094	0.363133	0.00285669	-0.306547	-0.0327177	0.285373	-0.276882	0.142849	-0.0333804	0.383202	0.0349022	0.186669	-0.258028	-0.0702908	0.0268781	0.163342	-0.113271	-0.122925	0.0614616	0.152521	-0.0155068	0.0120808	-0.0674994	-0.303575	-0.0571482	-0.0934605	-0.0706104	-0.0225635	0.126119	0.288668	-0.0478184	-0.205559	0.0835932	-0.235397	0.0852239	0.180863	0.000192255	-0.085494	0.325903	0.0338766
PLJN	1.00863	-0.0305774	0.516798	-0.516225	-0.43469	-0.52037	0.00706135	0.167878	0.00557972	0.478138	-0.177929	0.437906	0.52334	0.76091	-0.641722	0.0591969	0.358275	-0.473502	-0.468829	-0.471858	0.0282271	0.137674	-0.163427	-0.206098	-0.136199	-0.00335147	-0.348134	-0.276082	-0.2865	-0.243013	-0.528642	0.0260546	-0.0495198	0.332742	-0.268327	-0.172068	0.019921	0.088285	0.126074	0.102619	-0.131718	0.161751	0.134173	0.0529724	0.184307	-0.0140911	-0.0595176	0.0326579	-0.0832125
PLJN	1.22705	1.27049	-0.696631	0.44108	0.723323	0.389132	0.246029	-0.482254	0.920169	-0.868275	0.0269226	-0.258528	-0.387095	0.168516	-0.201655	-0.050584	-0.394165	-0.0326456	0.207165	-0.0418697	0.0109127	0.146472	-0.201942	-0.169528	-0.00572915	-0.0854866	-0.250175	0.345306	-0.346477	0.282968	-0.0944017	0.146007	0.0706992	0.111528	0.166108	0.182912	-0.0480432	-0.134967	-0.062043	0.291141	-0.01454	0.171858	-0.149215	0.0627556	0.155148	-0.122556	-0.180458	0.0985543	0.0821233
PLJN	0.701341	-0.0471708	0.247007	-0.224677	-0.733176	-0.907958	-0.0466819	0.414632	-0.15467	-0.145725	-0.0291551	-0.113514	-0.00466894	-0.475789	-0.155718	-0.199233	0.490932	0.288573	0.531933	0.182424	0.367513	-0.448903	0.176776	-0.158626	0.219127	-0.168231	-0.100172	0.0416175	0.392995	0.0203138	-0.0204631	-0.273659	-0.299007	-0.0390129	0.222	-0.0650036	0.130268	-0.0565601	-0.16989	0.0221586	-0.0690652	-0.0822118	-0.0349213	0.0226606	-0.0264231	0.103429	-0.0444649	-0.0521302	0.394289
PLJN	0.906046	-0.596599	0.182057	0.179163	0.0971635	-0.557683	0.457293	0.23522	0.433208	0.0207131	0.112693	0.313259	-0.660029	-0.0440847	0.235508	0.215757	-0.525244	-0.0275598	0.140017	0.310866	-0.316639	-0.167874	-0.0403642	0.371922	-0.218616	0.0733649	0.250545	-0.352079	-0.015257	-0.287332	-0.469306	-0.131367	-0.0805314	-0.142958	-0.325892	-0.175787	-0.068786	-0.208788	-0.192608	-0.0733868	0.186072	-0.0453233	0.0924786	-0.171117	-0.144475	-0.48887	0.0997256	-0.146611	-0.24986
PLJN	0.889509	-0.582271	0.529869	0.11178	-0.411368	1.10917	-0.397034	0.044056	-0.414565	-0.0770821	0.734377	-0.686213	0.320362	-0.242716	-0.34823	-0.110372	0.345192	0.0569905	-0.186815	-0.238684	0.0547665	0.180648	0.0428535	0.238988	-0.110099	0.298263	0.0835952	0.070602	-0.240048	0.178387	0.122131	-0.20277	0.0733531	0.0079555	0.140402	0.109044	-0.13126	-0.109556	-0.19122	0.040256	0.191703	0.11177	0.0672934	0.025041	0.0846388	-0.232144	-0.0464397	-0.152102	-0.248057
PLJN	1.27016	1.59508	-0.0107636	0.18332	0.35591	-0.40929	-0.738585	-0.509345	-0.499597	0.042696	-0.272969	0.68703	-0.0684959	-0.0509701	0.0479609	-0.00292285	-0.126436	0.00451192	0.0752219	-0.0106014	-0.184173	0.0461695	0.721142	0.181581	-0.132524	-0.109799	-0.229678	-0.207794	0.1779	-0.165253	-0.0330339	-0.237913	0.11501	0.0576798	0.0708929	-0.127704	0.076967	0.175002	0.0867183	0.117476	0.0221344	-0.0686517	-0.0178057	-0.110947	-0.0225537	0.108624	-0.0573124	0.118715	-0.0498914
PLJN	0.732755	-0.624764	0.324784	-0.560247	0.37782	0.0923572	1.07719	0.338536	0.269196	0.371816	-0.659472	-0.324671	0.0473997	0.15688	-0.0021061	0.0126503	0.118338	0.174354	-0.527733	0.167755	-0.156253	-0.0571949	-0.174288	-0.210672	-0.0997071	-0.631176	-0.0157041	0.0925262	0.212845	0.288564	-0.00373839	0.083473	-0.154364	-0.385011	-0.0839955	-0.108608	0.245797	0.10869	0.0400154	0.130844	-0.171677	-0.165051	-0.010212	0.105578	0.121317	0.0930169	0.00947785	-0.0556383	0.00165697
PLJN	1.09676	-0.599696	0.296741	0.885402	-0.347116	0.645623	-0.72243	-0.187036	-0.286897	-0.0743377	0.182383	-0.0751473	-0.281156	0.530043	-0.550768	0.164395	-0.226222	-0.13376	0.283167	0.0367799	-0.356191	-0.375789	-0.223198	-0.373238	-0.141621	-0.187504	0.135459	-0.138445	0.00519564	0.0260302	0.249175	-0.137332	-0.113247	0.18048	-0.0135713	-0.0237873	0.0162442	0.0612619	-0.180751	-0.24482	-0.0660234	-0.183077	0.120799	-0.0196512	-0.158654	0.174434	0.164162	-0.0308043	-0.125009
PLJN	0.588153	-0.296104	0.551423	-0.541763	-0.0911086	-0.0216156	0.40365	-0.0475094	0.468688	0.0352027	0.25931	-0.125641	0.22773	-0.287475	-0.31187	0.626413	-0.0329657	-0.0182691	-0.0606332	-0.0553817	-0.275756	0.654946	0.173054	0.154638	0.394305	0.306215	0.262145	0.121699	0.218578	-0.212359	-0.0870306	0.244005	-0.0848256	0.0802162	0.134539	0.0167468	-0.37137	-0.099116	-0.119416	-0.220089	0.0923655	-0.136975	-0.457093	-0.123125	-0.00917901	0.0686872	0.0571824	0.344831	0.0107273
PLJN	0.532596	-0.4585	0.0841954	-0.0550705	-0.0697367	-0.236357	-0.0522119	0.223017	0.362327	-0.301892	-0.0137435	-0.130958	-0.166228	-0.401427	0.43389	-0.54935	0.224692	0.498738	-0.315757	-0.629575	-0.0884137	-0.394092	-0.182448	-0.164927	-0.197674	-0.116675	-0.0578125	0.281917	-0.175537	-0.0192371	0.230199	0.00150762	0.568778	0.260557	-0.136923	-0.0916463	-0.164891	-0.0121606	0.217405	0.0300298	-0.15399	-0.164696	-0.116933	-0.218172	-0.0116548	0.0608693	-0.0321034	0.0879444	-0.00486696
PLJN	1.45786	1.39723	0.377385	-0.467165	0.539593	-0.0353665	0.196113	0.0483692	-0.546712	0.437152	0.239564	-0.0442375	-0.0245879	-0.0938789	0.288248	-0.0402582	-0.259237	0.262569	-0.275372	-0.0396032	0.0770992	-0.191728	0.0811741	0.268905	0.236284	0.304282	-0.117973	0.0305561	0.0349221	-0.198428	0.417676	0.338834	-0.232368	0.0488809	0.0844945	0.0717328	-0.0466366	0.122189	-0.0188777	-0.048788	-0.186005	0.058368	0.0429412	0.0311578	0.144775	-0.12303	0.205391	-0.212489	-0.0701549
PLJN	0.782215	-0.544365	0.379128	-0.157255	0.330426	-0.115768	0.0188509	0.2317	0.392516	-0.26067	-0.306769	-0.143499	-0.243474	0.0552535	0.251133	0.0376582	0.16502	-0.452309	0.230713	0.235264	0.0989678	0.464178	-0.00876549	0.347908	-0.133698	-0.00845783	-0.0513481	0.213793	0.241714	0.0580432	-0.179764	-0.228365	0.061372	0.437399	-0.0964595	0.121268	-0.0845539	0.179269	0.122454	-0.02044	0.0506971	0.155748	-0.0692329	0.116203	0.049279	0.0945795	-0.135091	-0.432636	0.213124
PLJN	0.318772	-0.230699	0.563757	-0.710519	-0.0665175	0.00500935	0.00276745	0.0303892	0.0547546	-0.0909904	0.197054	-0.0727214	0.0584474	-0.357805	-0.0363849	0.148786	-0.304408	-0.0972068	0.202053	0.0282857	0.229301	-0.0608573	-0.428489	0.376802	-0.0215914	0.0951094	-0.123595	0.112066	-0.161225	-0.171438	0.108584	-0.0394428	0.105685	0.201668	0.221382	0.0444888	-0.0304878	0.129196	0.0758161	0.00650775	-0.157329	-0.0221383	0.0383927	-0.122934	-0.0446747	0.28052	-0.0784481	-0.166365	0.153996
TSMJ	-0.301965	-0.196999	-0.0601415	-0.43507	0.0853553	-0.199483	-0.37563	-0.165828	-0.0992777	-0.123766	0.0463478	-0.191073	0.070974	0.0945924	-0.0237229	0.0351831	-0.162931	-0.128838	0.102814	0.129047	-0.0500683	-0.229236	0.0480638	0.150201	0.0102221	-0.184725	0.234947	-0.00052826	-0.162226	-0.138988	-0.113519	0.199461	0.118757	-0.000726019	0.0466644	-0.0342573	0.0041062	0.0700128	0.0470157	0.134336	0.0444696	-0.0107489	-0.0768732	0.0596841	0.0830128	-0.118903	0.130968	0.0662776	0.0367483
TSMJ	-0.0587913	-0.262998	-0.617124	-0.311382	-0.142482	0.194955	0.0331931	-0.157333	0.16619	0.304538	-0.167636	-0.0298278	0.216337	-0.00505604	-0.0732162	-0.0444014	-0.357946	0.309159	-0.156296	0.0113429	-0.0658607	-0.0641134	0.064351	-0.143515	-0.000359137	0.148384	-0.34896	-0.0363113	0.295789	-0.228	0.121233	-0.130919	0.0543949	-0.0518449	0.0234991	0.448989	0.0494282	0.105111	0.123387	-0.103524	0.023647	-0.158386	-0.0975534	-0.0553933	0.167963	-0.0984441	-0.052229	0.128527	0.0297795
TSMJ	-0.00415927	-0.283645	-0.625596	0.0304	-0.489873	-0.486707	0.297242	-0.342256	-0.61162	-0.112237	0.449074	-0.228202	-0.582105	0.594133	-0.0664393	0.224249	0.0752391	0.119858	-0.346378	-0.082284	0.374256	0.0938763	0.179653	0.184746	0.105739	0.534121	0.219665	-0.0417171	-0.141022	0.10169	0.177859	0.20055	-0.292682	0.00385851	-0.206794	0.0380939	0.199517	0.0104748	0.0132182	0.363012	-0.0738978	-0.0883002	-0.0550785	-0.312881	-0.119245	0.050702	-0.0193549	-0.147381	0.174558
TSMJ	0.0810763	0.128726	-0.192882	-0.243251	0.0801976	0.532931	0.254278	0.145335	0.50438	0.141224	0.203725	0.170364	0.653967	-0.628211	-0.0518414	-0.31067	0.00840393	0.206732	0.221713	0.267252	-0.199961	-0.192299	0.480548	-0.16831	-0.145854	0.0416162	0.0165493	0.00437515	0.0815596	0.0735534	-0.190871	-0.0331144	-0.286009	0.112418	0.235514	-0.180328	0.0682702	-0.0567126	0.307376	-0.0496744	0.189788	0.275196	0.226653	-0.0639538	-0.192105	0.00394803	0.200876	-0.368471	0.0478934
TSMJ	0.124753	-0.261715	-0.331437	-0.100525	-0.0273013	0.0491988	0.139668	-0.27994	-0.0357813	0.438044	0.091152	0.0265053	-0.160535	0.0403612	0.104265	0.0539506	-0.162044	-0.27715	0.0149602	0.0863797	0.174421	-0.426415	-0.17823	-0.0242455	0.456634	0.212165	-0.269129	-0.00839922	-0.0630597	0.374007	-0.115185	-0.0789801	0.314131	0.114175	-0.145477	-0.101491	-0.0766969	0.214599	0.000926496	-0.222531	-0.0713975	-0.0977763	-0.14236	-0.190479	-0.30065	0.12877	0.0299583	0.0370702	-0.0705933
TSMJ	-0.0424291	0.0852853	-0.597812	-0.261832	-0.0874774	-0.176823	-0.216716	-0.341152	-0.359891	-0.541735	-0.164233	0.571945	0.591444	-0.27495	-0.245829	0.0767393	0.210429	0.310707	-0.501726	0.193066	0.188978	-0.0581972	-0.373306	0.604879	0.206239	-0.0460819	0.144082	0.170995	-0.201227	-0.0507375	0.191563	0.1313	-0.161156	-0.143656	-0.0842065	0.157528	0.0509995	-0.0621603	-0.140211	-0.0458265	0.02772	-0.129878	0.0863857	0.00106981	0.131999	-0.133821	0.051225	-0.0725168	0.102391
TSMJ	0.426545	-0.27336	-0.337339	0.164795	0.116869	-0.19822	-0.506428	-0.0924735	-0.132091	0.511461	-0.0410316	-0.572314	-0.320689	-0.156202	0.203466	-0.0452497	0.230448	-0.456069	-0.283656	0.0838437	-0.374456	0.0961422	0.32635	-0.342718	-0.101951	-0.040934	0.319547	0.301472	0.263224	-0.29844	-0.0184231	0.226867	0.0331992	0.155887	-0.0199026	0.299715	-0.0279454	-0.233746	0.0780103	0.0827776	0.111981	0.204467	0.0695546	-0.100407	0.0861833	0.209658	0.0241019	-0.100498	0.141133
TSMJ	-0.00110084	-0.0923384	-0.613581	-0.0205336	-0.343364	0.435572	0.153045	0.207567	0.260133	-0.273825	-0.303411	0.525084	0.560721	0.146843	0.114675	0.395255	-0.13962	-0.096011	-0.21747	-0.016635	0.291134	0.0716477	-0.0850915	0.0405038	-0.0942847	0.0954223	0.209917	0.0819084	0.129498	-0.0121141	-0.0771604	-0.109441	-0.137099	0.324335	0.106364	0.144419	-0.0333663	0.0224496	0.241099	-0.289853	-0.0523268	0.200698	0.0128686	0.0833207	-0.0763834	0.00807352	-0.0335302	0.279881	0.0558676
TSMJ	-0.170175	0.0037246	-0.349875	0.238745	0.109055	-0.137588	-0.119742	-0.0138057	0.10645	-0.183044	0.402657	-0.621823	0.368726	0.229175	-0.207195	0.379739	-0.0345119	-0.0737721	-0.0688249	-0.176861	-0.0286115	0.0575695	0.10351	-0.108169	-0.1324	0.187355	-0.0607442	-0.0698152	0.197865	0.235438	-0.109725	-0.398096	0.129903	-0.147736	0.17453	-0.414119	-0.00590049	-0.127076	0.0790098	0.230554	-0.00618542	-0.0286478	-0.00196887	0.031748	0.0800905	-0.188827	-0.0251552	0.0464186	0.110048
TSMJ	0.133835	-0.148746	-0.58703	-0.351531	-0.291661	0.114526	-0.473636	-0.237664	0.292565	0.172308	-0.191046	0.307537	-0.249287	-0.123938	0.0241124	-0.274459	0.0600738	-0.0359466	0.604892	-0.400921	0.211208	0.125202	-0.124899	-0.128613	0.407331	-0.222785	0.119122	-0.100213	-0.247423	0.0151449	-0.127489	-0.336064	-0.317086	-0.0153468	-0.209313	0.205768	-0.130936	-0.0277075	-0.174941	0.00666258	-0.26664	0.107012	0.185496	-0.129748	0.181645	0.0851897	0.205122	0.090582	0.0562058
TSMJ	-0.0704144	0.0437074	-0.380648	-0.241846	0.109322	0.081109	0.342514	0.257306	-0.111566	0.144263	0.284162	-0.0286075	-0.10355	0.177742	0.104196	-0.156779	-0.183252	-0.0812414	-0.265108	0.137238	-0.247259	-0.132461	0.128981	-0.0103958	0.265517	0.214503	0.0423639	-0.0119241	0.160483	0.317719	0.0341067	-0.00809536	-0.180403	-0.0238227	-0.244074	-0.285512	-0.137489	0.219369	-0.161858	0.003121	0.37656	0.181779	0.030914	0.185349	-0.10145	-0.066099	-0.0707698	0.0656247	0.207099
TSMJ	0.029113	-0.236354	-0.412149	-0.483164	-0.197726	-0.0252157	-0.290611	-0.24366	-0.0232634	-0.12813	0.257079	0.0711651	0.0129027	-0.0940392	0.13537	-0.226055	0.345279	-0.0298201	0.0103152	-0.143359	-0.312441	-0.0430073	-0.0941597	0.221637	-0.14404	-0.0585988	0.0406281	-0.234854	-0.0699418	-0.0591247	0.0592054	0.0519213	0.367988	0.036709	0.177602	0.0367074	0.281136	0.000499019	-0.0360119	-0.273105	0.0733401	-0.0201548	-0.0183913	0.072962	0.0785651	-0.0947809	0.228051	0.0211399	0.048427
TSMJ	-0.0907791	-0.213542	-0.12364	-0.393214	-0.527892	-0.00374639	0.160207	-0.359751	-0.258219	0.126031	-0.398588	-0.208297	-0.210267	0.386529	0.194634	-0.288208	-0.330512	0.491655	-0.202051	0.0721517	0.346325	0.0597788	0.235182	0.144828	-0.0510953	-0.387273	-0.193622	0.0392291	-0.236823	0.0396556	-0.0547676	-0.0682566	-0.0189707	0.18091	0.246662	0.129098	-0.414933	0.121262	-0.0869304	-0.0611481	0.110571	0.163374	-0.0158792	0.050267	-0.236693	-0.00809126	0.00741574	-0.132052	-0.202888
TSMJ	0.0934999	0.0999595	-0.715181	-0.11333	-0.144784	-0.104815	0.18929	0.452006	-0.0314062	0.381625	0.39435	0.0940126	0.371527	0.143179	-0.353207	-0.225534	-0.0169906	0.188098	0.413051	0.115968	-0.347769	-0.215039	0.303195	-0.121621	-0.121031	0.255642	-0.137291	-0.0461439	0.0909978	0.0858009	0.161671	-0.0663848	0.288114	0.303441	-0.0720927	-0.0706267	0.0748686	-0.142794	0.207963	0.141958	-0.0692714	-0.257751	-0.237159	0.135752	0.187793	-0.196407	-0.169938	0.0679073	-0.170596
TSMJ	0.106789	0.236937	-0.0742481	0.489954	-0.611815	0.385922	-0.437829	-0.0361884	-0.178935	-0.641464	-0.515257	-0.252566	-0.0628161	-0.503344	-0.0127277	0.1001	-0.27054	-0.323416	-0.474637	-0.089463	-0.00753816	-0.391758	-0.0210785	-0.0235867	0.270646	0.155579	0.195625	0.380846	0.271769	-0.0193061	-0.545379	0.0913679	-0.332263	0.213137	-0.304498	-0.101352	0.260601	0.1802	0.00516062	0.0930115	0.0711722	0.0425163	-0.0697239	0.229558	0.0848604	-0.071242	0.0993413	-0.137185	-0.0372555
TSMJ	0.196914	-0.299522	-0.84369	-0.000713038	0.203126	-0.615016	0.0084328	-0.282748	-0.0292502	0.075815	0.27096	-0.240773	0.134533	0.0509738	-0.0429921	-0.210566	0.282888	-0.0357976	-0.0773212	0.397391	0.613633	0.0660022	0.0991229	0.178696	-0.373836	-0.208652	0.346632	0.146493	-0.0399701	0.23799	-0.0328801	-0.345511	-0.116934	-0.154977	-0.084867	0.0389376	-0.247791	0.133834	0.438567	-0.163247	-0.0152712	-0.00957224	-0.0620407	-0.236724	0.0938814	-0.225118	0.123602	-0.00525322	-0.168119
TSMJ	-0.223244	-0.0709688	-0.268585	-0.139979	0.328152	0.399976	-0.133439	-0.02994	0.0850315	-0.224729	0.0709867	-0.108016	0.232885	0.667582	0.188197	-0.134636	0.329024	0.0151954	0.14678	-0.344161	-0.189865	0.0955381	0.174836	-0.210016	-0.163118	0.221439	0.175946	0.365004	0.284101	-0.176965	-0.209496	0.284322	-0.0385474	-0.143841	0.140946	0.0172297	0.11195	0.334798	-0.248567	0.0293478	-0.249702	-0.228677	0.0093647	-0.182967	-0.30918	-0.00251556	0.176776	-0.127752	0.143299
TSMJ	0.108626	-0.169197	-0.863874	0.058137	-0.469737	0.118407	0.257053	-0.234435	-0.393905	-0.108058	-0.0154871	-0.241565	-0.183568	-0.682036	0.043366	0.444961	-0.0953343	0.23629	-0.130682	-0.0638857	-0.500031	0.137379	-0.1535	0.169585	-0.0248329	-0.447481	-0.0887198	-0.0715989	0.10712	-0.0551907	-0.0495403	0.0466906	0.132261	0.0391166	0.151559	-0.0327728	-0.0919184	-0.304277	-0.0999146	-0.224918	-0.20346	-0.00258334	-0.0884959	0.126635	-0.0870989	-0.000571312	-0.18757	-0.104986	0.0636308
TSMJ	0.0555149	-0.0995219	-0.0612986	-0.432375	0.169127	0.103516	0.0772667	0.144799	-0.019682	0.20595	0.0749918	0.0846228	0.208804	0.221706	-0.203382	-0.304895	-0.320455	0.573207	-0.151205	-0.0714828	0.0113844	-0.453983	0.0462589	0.0846067	0.00684411	0.0321165	0.359297	0.138975	-0.112496	-0.202264	-0.266157	0.0329873	0.0201346	0.0204375	-0.0993235	0.17376	0.3432	-0.452474	-0.33454	0.168995	0.285082	0.178774	-0.220409	0.00508589	-0.0809479	0.205689	-0.0652291	0.26528	-0.0368246
TSMJ	0.0216964	-0.244664	-0.720946	-0.157699	-0.450527	0.238037	-0.466772	0.352805	-0.0618477	0.190746	-0.1615	0.393245	-0.169746	0.498079	0.167741	0.570391	0.0533987	0.102334	0.0119184	0.128896	-0.239145	0.185234	0.108962	0.254014	0.0836636	-0.195954	-0.0789698	0.27745	0.0657804	0.377874	0.191806	-0.162875	0.018963	-0.0516816	0.0332902	-0.251185	-0.034195	-0.0153843	-0.142343	-0.00836337	0.305408	-0.199884	-0.103151	-0.144906	0.118107	0.0505088	-0.209702	-0.0181974	0.18228
TSMJ	-0.209445	-0.170589	-0.702953	-0.0324297	-0.0716717	0.00068086	0.314189	-0.219251	0.400653	0.110835	0.274505	-0.0460366	-0.0578896	-0.208109	0.00965215	-0.121056	-0.298105	0.0866573	-0.213851	-0.389205	-0.141551	0.153888	0.0169173	-0.186237	0.0575038	0.448631	-0.24525	0.087127	0.211147	-0.311599	-0.05977	-0.242536	-0.0069131	-0.288482	-0.390257	0.0450055	0.0554671	0.103708	0.00655064	-0.0255042	-0.232164	-0.0141841	0.19153	-0.125899	0.0503771	0.122029	-0.0908636	-0.154108	0.0614645
TSMJ	-0.218762	-0.274552	-0.265095	-0.238753	0.184168	-0.148769	-0.262036	-0.134797	0.0197586	-0.0541093	0.0936448	-0.00481158	0.290365	0.197104	0.0144787	-0.0210632	0.0553923	-0.237192	-0.0616311	0.0763102	-0.1334	-0.197516	0.0895274	0.242756	-0.253842	-0.233901	0.282686	0.0921015	-0.129624	0.0653841	-0.0750518	0.254526	-0.021249	0.0711688	0.459953	-0.166268	0.26753	0.0333407	0.212098	-0.0654562	-0.049682	0.196088	-0.0631245	-0.24284	0.204876	-0.0739053	-0.0806367	0.0351641	-0.137147
TSMJ	-0.125103	-0.192766	-0.508357	-0.416769	-0.362128	0.23041	-0.392995	0.0152059	0.266668	0.144484	-0.0590446	-0.173172	0.0382943	0.0602987	-0.106244	0.0211102	-0.320544	-0.161068	0.0762006	-0.0200234	-0.0917424	0.146341	0.304685	0.0248583	0.0711772	-0.0580253	0.10088	-0.0576192	0.104411	-0.0928969	0.0963694	-0.166711	0.113799	0.0876452	-0.0303766	-0.0788959	-0.0155227	0.019779	0.12638	-0.210309	-0.117603	-0.0200049	0.203382	0.0707539	0.0536898	-0.088878	-0.0205867	0.114833	-0.0348546
PLJC	-0.572609	-0.00202244	0.109016	-0.197516	0.419176	-0.1133	-0.0644523	-0.221243	-0.130849	-0.0790576	-0.0115646	-0.110131	-0.169784	0.11643	-0.206126	-0.104091	0.0160615	0.061492	-0.0541264	0.0827568	0.0143091	-0.115267	0.170039	-0.0836572	-0.199894	0.0778966	-0.0154892	0.0816466	-0.0336528	0.0645364	-0.146959	0.0744148	-0.0191105	0.017869	0.116799	0.0041807	-0.13788	-0.0153252	0.0300246	0.0453742	0.00569663	-0.0520848	-0.0340369	-0.0828099	-0.00180798	-0.0298451	-0.131541	-0.0963482	-0.0638703
PLJC	-0.469378	0.145921	0.3069	0.361104	-0.00498057	0.00577022	-0.119282	0.365613	0.00564899	0.171413	0.42864	0.0309528	0.118548	0.104408	-0.0863264	-0.0917424	-0.131584	0.142848	-0.112117	0.00515133	0.118238	0.0849751	0.189809	0.24143	0.214824	-0.139095	-0.0517445	-0.0751703	0.423566	0.0835087	-0.0753374	0.169333	0.00135951	0.200176	-0.106978	0.166636	-0.317899	-0.174902	-0.0336401	0.0249924	-0.0138498	-0.151541	0.0296886	0.035463	0.125851	0.323791	-0.0666163	0.0222373	-0.0934876
PLJC	-0.44134	0.0825276	0.0803481	0.334589	-0.0442959	0.354147	0.369749	-0.11531	0.212963	-0.0298785	-0.13658	0.338313	-0.0952883	-0.174048	0.143712	0.296696	-0.00285692	-0.00250715	-0.164481	0.371244	0.152013	0.130323	0.334844	-0.366097	-0.13309	0.253337	0.0604284	0.198319	-0.146262	-0.166942	0.282008	-0.238394	0.00441574	-0.176935	0.207376	-0.284306	0.132647	0.187044	0.0906984	-0.104025	0.0207587	0.173223	0.0353646	0.0902598	0.121214	0.117653	0.167308	0.13456	0.016762
PLJC	-0.168367	0.0669907	0.0699664	-0.169578	-0.298801	-0.0835284	-0.146762	-0.0282906	-0.180469	-0.352396	0.124085	-0.00794396	0.192707	0.0719311	-0.0910473	-0.17968	-0.0407386	-0.102475	0.132302	-0.20871	-0.0725932	0.22316	-0.273305	0.0816944	0.110462	-0.010003	-0.206611	-0.101664	0.362688	-0.149295	0.178492	0.124977	0.0823077	-0.158441	-0.0106799	-0.116381	-0.286861	-0.0943862	0.116131	0.30857	0.300197	0.05808	0.103778	0.330613	0.214724	0.0640414	0.380896	0.0667061	0.0876525
PLJC	0.0262474	0.0939279	-0.23391	-0.00909544	-0.283811	0.237776	0.00822364	0.00617782	0.514649	0.824286	-0.608116	-0.0576866	-0.220495	-0.581017	-0.259869	0.247831	0.420384	-0.174904	0.196049	-0.0523495	-0.135441	-0.171819	0.131246	-0.0539999	-0.132201	0.151891	-0.0993012	-0.131075	-0.555862	0.19529	0.242918	0.122047	-0.516658	0.155221	0.0801992	0.350575	0.128213	0.144014	-0.128926	0.0606911	0.246769	-0.157467	-0.0345278	-0.137079	0.0984565	0.027529	-0.0140463	0.12239	-0.109583
PLJC	-0.385291	0.137307	-0.140227	-0.0529143	0.24878	-0.164745	-0.0677597	0.136204	-0.205677	-0.0396658	0.318045	0.415908	-0.255734	0.11364	-0.138689	-0.0406612	0.129482	0.130169	0.403147	-0.208421	-0.449684	-0.35492	-0.151366	0.109282	0.149369	-0.217639	0.0921838	0.430924	-0.00431299	-0.0500456	-0.412327	0.110097	-0.0281251	-0.0031999	-0.201744	0.0526785	-0.230321	0.138944	0.163699	-0.177004	-0.0721339	0.0960962	0.0663923	0.220428	-0.0383612	-0.0922206	-0.0257324	-0.025378	-0.0683604
PLJC	-0.000297924	-0.0777028	-0.474511	-0.0910689	-0.267142	-0.24405	0.624662	-0.277049	-0.439474	-0.255649	-0.069054	-0.171137	-0.139945	0.174162	0.432286	0.194111	-0.240467	-0.147451	0.0109146	-0.115252	0.158842	0.375701	-0.133842	-0.0801665	0.2036	-0.0868086	-0.328462	-0.152224	-0.0778696	-0.200878	0.0527419	-0.10763	0.203605	0.0949264	0.0502905	0.161964	0.481927	-0.278088	0.150967	-0.174304	0.27536	-0.130726	0.172793	0.123777	-0.0307746	0.208472	0.229327	-0.169482	-0.278061
PLJC	-0.186571	0.274392	0.317679	0.949051	0.493333	-0.0768477	-0.194527	-0.0538246	0.173161	0.4122	-0.547896	-0.526374	0.245417	-0.00989813	-0.267907	-0.309281	-0.0361873	0.333385	-0.204746	-0.0592974	-0.0164372	0.123306	-0.226113	0.503346	-0.151421	-0.0871236	0.328355	-0.0863494	0.44059	0.1432	0.0611224	0.156674	0.00028393	0.0167288	-0.0301904	0.182158	0.201547	-0.180904	-0.182836	-0.19135	-0.187539	-0.143392	0.32213	-0.0593882	-0.00832038	-0.110089	-0.0671466	0.0820909	-0.020503
PLJC	-0.355347	0.135647	-0.0149977	-0.078092	-0.266925	0.0339302	0.107097	0.0919364	-0.0912117	0.058947	-0.306483	0.200358	0.00457491	-0.0216152	-0.0652141	0.0940354	0.325055	-0.0610899	-0.147316	0.160141	-0.420727	0.0285575	0.0825516	0.082479	0.483751	-0.0136976	-0.129833	0.0630067	-0.00427115	0.333378	0.0511652	0.095069	-0.0630432	0.15309	0.0697823	-0.167764	-0.320348	-0.0175564	-0.0534694	0.169688	-0.00392142	-0.177563	0.142563	0.16238	-0.0396243	-0.0132935	-0.117528	-0.224431	-0.331828
PLJC	-0.118391	-0.0712636	-0.34083	-0.27711	0.207054	-6.99709e-05	0.278671	-0.0660685	-0.338042	-0.286073	-0.0827336	-0.379926	0.075695	0.153555	0.684482	-0.159301	0.041564	-0.109033	0.557105	-0.292552	-0.0386949	-0.0568479	0.431258	0.250783	-0.108466	-0.239446	0.275608	-0.62163	-0.0812286	-0.0220788	0.00430045	0.168608	-0.117843	0.0105475	-0.079745	-0.237678	0.0552776	-0.0896565	-0.223794	-0.0734074	-0.122063	0.0877085	-0.153006	0.189714	0.00769709	0.0807333	-0.111249	0.104833	0.0157944
PLJC	0.00509597	0.418666	0.160722	0.598193	-0.688232	0.427012	-0.546108	0.687709	0.185901	0.526688	0.473126	0.467747	0.298378	-0.0447018	0.940763	-0.258939	-0.0962598	0.0467404	-0.116047	0.186968	0.420207	0.198915	-0.246947	-0.0967493	-0.326756	0.0616465	-0.232871	0.105736	-0.135521	0.136541	-0.262999	0.422773	0.187511	-0.187966	-0.158317	-0.115122	-0.134039	-0.0894672	-0.0242836	-0.160378	0.059438	-0.109567	-0.0882345	-0.171777	-0.0265624	-0.0521949	-0.0744903	-0.204132	0.101923
PLJC	-0.30357	0.000144541	0.0956579	0.0463414	0.0281917	-0.244937	0.13946	0.210128	-0.338006	-0.194951	-0.414257	-0.297204	0.626109	0.299524	-0.243312	-0.0640091	-0.327236	-0.0550107	0.0409173	-0.120552	0.139919	-0.287605	-0.00346511	-0.431103	-0.194644	0.097564	0.311004	0.195206	-0.182017	-0.321821	0.299014	-0.409209	-0.00743196	0.0624884	-0.201773	-0.158737	-0.105323	-0.0874779	-0.131201	0.0253236	0.0237941	0.0127305	-0.0123268	0.192536	-0.12072	0.0234829	-0.216358	-0.187841	0.184727
PLJC	-0.349408	-0.0527195	0.0968814	0.222442	0.248258	-0.327743	-0.10278	-0.165536	-0.0523163	-0.355461	-0.0199826	0.203796	0.175107	-0.0915777	-0.165196	0.329057	0.363805	0.321201	0.06162	-0.0680099	-0.14566	-0.241451	-0.144707	0.130505	0.130632	-0.104005	-0.47019	0.165562	0.370816	0.073402	-0.12308	-0.27998	-0.17039	-0.284085	0.164679	-0.129011	-0.177996	-0.25963	0.0968752	-0.0193446	-0.027936	0.235951	0.0785991	-0.223291	-0.139669	0.109123	0.129144	-0.0692698	-0.190206
PLJC	-0.510441	0.0990476	-0.0931879	0.183193	0.100287	-0.278073	0.185901	0.044585	0.0866657	0.583508	0.511863	0.110716	-0.472371	0.0150338	-0.781557	-0.0799806	-0.350203	0.153109	0.0155114	-0.033973	0.0442872	0.266276	0.233973	-0.234735	0.0946841	-0.609106	0.235729	0.221926	-0.153884	-0.210668	0.103166	0.175953	0.162631	0.00334441	-0.0563115	-0.019784	-0.296613	0.119851	-0.0139758	-0.042563	0.0141267	0.166886	-0.0902522	0.0754343	0.130179	0.0588616	0.201965	-0.14954	0.155054
PLJC	-0.457912	0.182409	0.313047	-0.094867	0.204356	0.0372305	-0.259922	-0.0303014	-0.12125	-0.155429	-0.21256	0.0776943	-0.191751	0.143874	-0.128153	0.0855196	0.177604	-0.0644582	0.0715492	0.239918	0.156444	-0.0126393	0.00612105	-0.121186	-0.277454	0.0501099	-0.00743361	-0.0398222	0.27449	0.106304	-0.184917	-0.123579	-0.0769032	-0.0982406	0.0729796	0.102968	0.0857638	-0.140979	0.0241194	-0.0689515	0.0467191	-0.0425797	-0.263359	-0.088669	0.146561	0.0735636	0.0335084	0.0135935	-0.204249
PLJC	-0.47834	0.0239273	0.128567	-0.175717	0.291567	-0.177233	-0.137918	-0.0611863	-0.303631	-0.175497	0.0588402	0.0406179	-0.242674	-0.263951	0.0883766	0.0280799	-0.143489	-0.0407996	-0.26685	-0.0322044	0.0488989	0.00620088	0.0349589	-0.17082	0.036578	-0.0140564	-0.0273683	0.00503269	0.0424823	0.374782	-0.264797	0.0402029	0.0449012	0.0650673	-0.140615	0.147161	-0.0517603	0.00029519	-0.0117283	0.170542	0.0955027	-0.0795795	-0.0273428	0.140761	0.0490622	0.025593	-0.0661384	0.0513605	-0.125699
QYXF	-0.540164	0.0750126	0.12683	-0.121504	0.192781	-0.293163	-0.226571	-0.0204713	-0.264764	-0.0868	0.0661562	0.00254403	-0.00035348	0.021672	-0.0100541	0.182499	0.212107	-0.0262351	-0.27429	0.126731	0.230285	0.125214	-0.0794115	-0.404027	-0.238506	-0.0644915	-0.329267	0.0290641	0.132497	0.0736823	-0.0195378	-0.055972	-0.0832168	0.146751	-0.0696518	0.425988	-0.156891	-0.0761945	-0.114749	-0.0282988	0.069113	-0.00984853	-0.0426171	-0.0613953	-0.194993	-0.0401239	-0.17153	0.119884	-0.158788
QYXF	-0.397891	0.189421	0.422523	0.356105	-0.213644	-0.288991	-0.30675	0.0716195	0.0385144	0.136858	0.331592	-0.034579	0.119801	-0.00493774	-0.337153	-0.230593	-0.540781	-0.0586154	0.0366037	-0.160963	0.152245	0.0363064	-0.174394	0.0667399	0.318067	-0.383481	-0.057601	0.243136	-0.0611016	0.294014	0.116119	0.074713	-0.0828535	-0.357344	0.0801269	-0.140257	0.440092	0.244921	0.0904347	-0.215133	0.0703484	0.120527	-0.184505	-0.0213107	0.164948	-0.0137496	-0.0491228	-0.0479123	-0.0344188
QYXF	-0.141203	-0.019034	-0.248332	0.263714	0.220648	0.307735	0.336433	-0.0225037	-0.302138	-0.0804852	0.140261	0.316046	-0.107353	-0.264511	0.056461	-0.126693	0.441075	-0.119811	-0.39429	0.307567	-0.083125	-0.233517	0.168364	0.155269	-0.106983	-0.146378	0.199648	0.0856038	-0.363278	0.110485	-0.387431	-0.0859966	0.27891	0.364165	0.00119843	0.0132576	0.0696169	0.223079	-0.203964	0.0224048	-0.125473	-0.132592	0.00809929	0.227687	0.0309676	0.213005	0.116783	0.0948193	0.0840801
QYXF	0.226213	0.524359	0.379099	0.227626	-0.934634	-0.399876	0.0127848	-0.550141	0.167614	0.236098	-0.358566	-0.668318	0.390045	0.123203	0.473638	0.469673	0.0363765	0.398264	0.493332	-0.187661	-0.224043	0.0934282	0.0351597	0.15463	-0.325962	0.113165	0.0629242	0.14302	-0.238495	0.1092	-0.447873	0.0581343	0.0079074	-0.468818	-0.0337597	0.109064	-0.228345	0.312654	-0.100132	0.0182567	-0.0717491	0.0426436	0.207576	0.130758	0.0445184	0.136001	-0.0805863	0.167446	-0.0419809
QYXF	-0.0620553	-0.309223	-0.66415	0.0848738	1.04013	0.363891	-0.220048	0.59802	0.100718	0.30773	-0.395548	0.158922	-0.0880116	0.253493	0.37186	0.0328666	0.0780898	0.357984	0.0235334	-0.763233	0.318996	-0.134708	-0.186924	-0.127914	0.011808	0.225573	-0.0454665	-0.074118	0.00750841	0.00575609	0.0627427	-0.0796952	-0.348597	-0.0619678	0.224784	-0.10634	-0.143969	-0.0768133	-0.0734978	-0.110745	0.0728112	0.0829502	-0.144659	0.261381	0.157122	0.0102634	0.13037	-0.142036	-0.217247
QYXF	-0.0108597	0.61443	-0.25683	0.728692	-1.01456	-0.00345238	0.889291	0.646485	0.222457	-0.509203	-0.161833	-0.101295	0.304462	0.101747	-0.102625	-0.520969	0.0148341	-0.449855	0.138724	0.221058	0.195639	-0.169574	0.138461	0.0334664	0.286485	-0.12089	0.196619	-0.111452	0.0150756	-0.345793	0.168351	0.0668853	0.0460865	-0.0589865	0.102944	0.288004	-0.108832	0.101086	-0.0887287	0.114223	0.0781181	0.219179	-0.0911938	-0.346195	-0.0404997	0.057882	-0.0631936	-0.0296017	-0.31087
QYXF	0.0309856	0.214985	0.497406	0.332426	-0.138379	0.0102906	0.0764899	-1.20807	-0.184394	0.52015	0.0142231	0.171046	0.349674	-0.0140834	0.430604	0.262989	-0.0675559	0.414073	0.204521	0.378932	-0.0997236	0.0612982	-0.310227	-0.629951	0.111418	-0.142654	0.135417	0.168462	-0.0148335	-0.231642	0.0612576	-0.130134	-0.00351888	0.316763	-0.124986	-0.177525	0.174485	-0.308087	0.0319828	0.0532603	0.198235	0.103213	-0.170495	-0.0542286	-0.0450594	-0.14329	-0.183772	-0.0897632	0.0698056
QYXF	-0.476961	0.244976	0.134419	0.475092	0.153943	-0.537503	0.116964	0.749386	0.139784	-0.141861	0.467306	-0.019136	0.255313	-0.0138826	0.209354	0.233416	-0.283516	-0.45003	0.128938	-0.278626	-0.0202544	-0.135643	-0.0156487	0.194974	-0.113157	-0.273135	-0.123174	-0.0832131	-0.0363297	0.169953	0.126408	-0.0992979	-0.12854	0.304243	-0.0814595	0.329183	0.178679	-0.144278	0.0564181	0.0281553	0.111116	-0.105021	0.0726499	0.103016	-0.155167	0.0138418	0.2587	0.159053	0.111053
QYXF	-0.448096	-0.0157828	0.134864	-0.185677	0.0942823	-0.0509886	-0.249586	0.0173618	-0.17635	-0.156009	-0.101489	0.0870768	-0.154423	-0.215361	0.118683	-0.0170059	0.0442274	0.0296593	-0.0447834	-0.0603413	-0.0575361	-0.0244818	0.0916847	-0.277187	-0.105304	-0.00868338	0.0286414	-0.0281871	-0.00133159	0.232317	0.138406	-0.0556459	0.13685	0.00295303	-0.197073	0.224159	-0.0503912	0.0335821	0.0684103	0.105742	0.130535	-0.0686296	0.119295	-0.102135	0.0407943	-0.0524501	-0.0140513	-0.0029014	0.136597
PLLT	-0.591306	-0.0806763	0.426291	-0.164811	0.178252	-0.12946	-0.101862	-0.245348	-0.0250495	-0.125983	-0.252265	0.0374126	-0.227039	0.149609	-0.0854938	-0.0542227	0.00203323	-0.158759	-0.190823	-0.0474383	0.0153642	-0.285857	0.0321586	0.0922081	-0.0357401	0.197095	0.124831	-0.19003	-0.114884	0.118996	0.188224	0.139183	0.00437008	-0.117894	0.0623503	-0.256198	-0.151191	-0.0926293	0.0930575	-0.247539	0.14948	0.280915	0.11666	-0.210248	-0.0557262	0.258288	-0.165641	0.109474	0.00928979
PLLT	-0.364119	-0.036687	0.025789	-0.180797	-0.000256001	0.382869	-0.31319	0.243775	0.049217	-0.0194074	-0.101041	0.0219115	-0.162745	0.0616371	0.103238	0.0215696	0.315967	-0.116671	0.118265	-0.0499769	-0.0767151	0.256716	0.046431	0.0627754	0.0983634	-0.154244	0.0128434	-0.354417	0.233953	-0.298536	0.122169	0.0468094	0.0306257	-0.263219	-0.0735795	0.1177	0.229103	0.375009	0.148451	0.181659	0.300052	-0.0575302	-0.372353	0.0559448	-0.185147	-0.109942	-0.103746	0.0385895	-0.0929218
PLLT	-0.594076	0.0753693	0.279377	0.191507	-0.134847	-0.126176	0.114807	-0.156286	0.30158	-0.49897	-0.153052	0.193584	-0.325591	0.325393	0.0129828	4.98585e-05	0.0796647	-0.0869096	0.00872508	-0.305971	0.0343235	-0.134202	-0.0333381	-0.0928579	0.139478	0.00116718	0.0318502	0.368915	0.00501679	-0.278923	0.290291	-0.0831867	-0.0397279	0.0855769	0.200854	-0.29523	-0.228361	0.0921983	-0.305882	-0.225819	0.0695146	-0.21415	0.017552	-0.15034	0.13895	-0.0713856	0.10491	0.0064247	-0.183394
PLLT	-0.0395291	-0.0123502	-0.424399	-0.123571	-0.126409	0.19266	-0.0952044	-0.189513	-0.0549001	-0.34653	-0.0463153	-0.124153	-0.0158173	-0.0806559	-0.285032	-0.803768	0.299772	0.329702	0.062803	0.340031	-0.399828	0.532199	-0.517423	-0.297284	0.237913	0.132371	-0.205053	-0.432654	0.0123979	0.0709082	-0.247573	0.0685194	-0.0541196	0.000327383	-0.143961	-0.0670449	0.198476	-0.0135683	0.108597	0.0602204	-0.0631621	0.0245483	0.0314232	-0.180325	-0.0328698	0.105785	0.132879	0.0370092	-0.0322515
PLLT	-0.104022	-0.100249	0.0775022	0.236455	0.300427	-0.296764	0.255352	0.0169301	0.00385056	0.0233975	0.573959	-0.24636	0.439921	-0.184683	0.359259	0.63024	0.186161	-0.172148	0.0575339	-0.29855	0.0295068	-0.193763	0.310254	-0.473801	0.608608	-0.254102	0.0688667	-0.18134	-0.203714	0.38461	-0.0186375	0.197481	0.180661	-0.00880476	0.0588333	0.137705	0.0817622	0.0722747	-0.000257203	0.17878	-0.1228	0.0489144	0.427196	-0.179988	0.023587	-0.115552	-0.0309465	0.0680272	-0.0748187
PLLT	0.0014782	0.323852	-0.232606	0.602958	-0.676749	-0.174395	0.515573	0.405796	-0.404384	0.32846	-0.59199	0.583064	-0.359093	0.0945172	-0.0619835	0.127054	0.100608	0.0661497	0.155961	-0.350937	-0.0451065	0.0253302	-0.336711	-0.0847999	-0.289274	0.300478	0.257001	-0.0814545	0.338647	0.319008	0.0621844	0.267503	0.346856	0.144568	0.350912	0.058308	-0.0268995	-0.158869	-0.0255322	0.0762699	-0.141852	0.237819	-0.0505398	-0.0464155	-0.0283585	-0.197499	0.149552	0.0707948	0.313014
PLLT	-0.0250705	0.0511746	-0.0941416	0.0261322	0.239529	0.327624	-0.262011	-0.38609	0.339717	0.0691838	-0.358339	-0.329114	0.561859	0.430986	0.0789687	0.120168	-0.0953129	-0.325989	-0.0630619	0.597698	0.40388	-0.477488	0.0447717	0.0576754	0.244662	-0.161224	-0.279353	-0.193599	0.0645352	-0.132784	-0.084461	0.175197	0.370439	-0.139459	-0.20124	0.102327	-0.220005	-0.120314	-0.0829988	-0.0638021	-0.181275	-0.265131	-0.267296	0.0422763	0.044712	0.0856247	0.222749	0.0104213	0.147637
PLLT	-0.30527	0.161322	0.287613	0.540819	0.160149	-0.349111	0.0366154	0.469944	-0.175817	-0.269842	0.269725	-0.173244	-0.0358374	0.139939	0.367399	-0.103426	0.259788	0.208514	-0.44599	0.349015	-0.489673	0.312857	0.0499807	-0.0842754	-0.100779	-0.0554176	-0.263228	-0.0673448	-0.397913	-0.385029	0.00891024	-0.28809	-0.31725	0.169875	0.0420655	-0.118724	0.102932	0.138221	-0.24777	-0.323596	-0.123559	-0.113555	0.0462689	-0.124054	0.314729	-0.125296	0.124345	0.178582	0.196288
PLLT	0.268599	0.088631	-0.235189	0.0417706	0.357222	-0.688204	-0.166885	-0.103768	-0.155476	0.553671	0.00296319	-0.141606	0.0207066	-0.337161	0.241176	-0.363726	-0.0833622	-0.519333	0.303084	-0.0728275	0.259826	0.331494	-0.31713	0.0383377	0.179159	0.419049	0.219893	0.459272	-0.041711	0.0643756	-0.110898	-0.153181	-0.0527526	-0.0126607	0.2837	-0.123971	0.169102	-0.0291413	-0.00386241	-0.0255928	0.185293	-0.351964	-0.00952895	0.257934	-0.147309	0.150858	-0.0057175	0.0925274	-0.167733
PLLT	-0.00663902	-0.105889	0.00587567	0.524828	0.252236	0.445431	-0.00131679	-0.228145	0.447002	0.132542	-0.0728252	0.108396	-0.00873207	-0.178634	0.0141214	0.334852	0.557345	0.270756	0.152721	-0.352859	0.513305	0.130004	0.184566	0.476483	0.126459	-0.211304	-0.0329658	0.0407583	0.118017	-0.247206	0.182537	0.103942	0.223039	0.109409	-0.749131	-0.405766	0.236619	-0.074463	0.00107087	0.134329	0.230254	0.262044	0.141008	-0.132852	0.110976	0.0665877	-0.0788076	0.0534787	-0.0531179
PLLT	-0.386845	0.330594	0.216982	-0.268206	-0.153476	0.191023	-0.104551	-0.0144173	-0.174335	-0.25399	0.0745329	-0.0241694	-0.10945	-0.18904	0.0339375	0.116885	-0.111895	0.241873	-0.0840512	0.0231751	0.225364	0.48727	0.23458	-0.284959	-0.316862	-0.132811	0.281718	-0.287142	0.295737	0.158891	0.181101	0.0911113	0.035168	0.071447	-0.183733	0.110265	-0.151276	0.141735	0.0441381	-0.112508	-0.264704	0.219018	0.0513686	0.204471	-0.154639	0.0214874	0.149883	0.0580811	-0.168262
PLLT	-0.512549	0.216068	0.330955	-0.0735407	-0.0788318	0.211541	-0.0778816	-0.0185552	-0.146696	-0.0561683	-0.309119	0.434958	-0.0173292	-0.132784	-0.245932	-0.339413	-0.165666	-0.222786	-0.0566855	0.0425187	-0.396309	-0.0101218	0.058904	-0.00468846	-0.0200156	0.124183	0.22313	-0.189651	-0.284398	0.218944	0.0575064	-0.0409331	0.0857153	-0.486588	-0.206547	0.146947	-0.0729631	-0.196386	0.142065	0.0728995	0.0726229	0.0171798	-0.0137161	0.0289251	-0.0913368	0.0694327	-0.165315	-0.072729	0.0423935
PLLT	-0.393799	-0.125002	0.357946	-0.229921	0.15928	0.137483	-0.0320142	0.0815198	-0.0305999	-0.273174	-0.238988	0.116159	-0.37482	-0.0947533	0.0128321	-0.0120902	0.0280002	-0.144083	0.0902649	0.201644	-0.120535	0.160301	0.0890525	0.0985785	0.115564	0.260145	0.0236696	0.0479251	-0.181068	0.113364	0.185661	-0.038207	0.361288	0.0170581	-0.0743157	-0.0214234	0.0276008	0.0384406	0.00399429	-0.016892	-0.193151	0.228923	0.0454592	-0.0817054	0.148332	-0.0131308	-0.013596	-0.00552299	0.167066
QYNX	-0.464659	-0.0502329	0.149616	-0.339984	0.068232	0.0637222	0.0408779	-0.0729831	0.0261906	0.0396526	0.036436	0.0834474	-0.34037	0.105934	0.0124146	-0.080627	-0.159432	0.052573	0.094547	-0.0418381	0.0371916	0.0128026	0.0179913	-0.240358	-0.0903071	0.0660667	0.0220365	0.099163	0.144113	0.0347426	-0.0595222	0.0310227	-0.169873	-0.0209951	-0.0127203	0.141268	0.0572512	-0.0922438	0.0220108	0.0455923	-0.155036	0.0334535	0.0710335	-0.165049	0.0388137	-0.0925703	-0.0418747	-0.0782392	-0.0659943
QYNX	-0.353166	-0.0459648	0.294242	-0.164366	-0.0360864	0.00811762	-0.0437998	-0.334628	0.215543	-0.102479	-0.0420895	-0.0441753	0.0683847	-0.091899	-0.00946349	-0.0701309	0.0134234	-0.113555	0.141602	-0.0404806	-0.053241	-0.207434	-0.141457	0.104086	-0.080831	0.158564	0.106738	-0.083212	0.102942	-0.109337	0.144934	0.107222	0.19072	-0.0317146	0.0294907	-0.208242	0.0831848	0.311933	0.127194	0.149617	0.1499	-0.0906975	-0.00538567	-0.0385137	-0.0723724	0.0801096	0.0259863	9.67636e-05	-0.0107426
QYNX	-0.589673	-0.000595918	0.210218	0.666459	-0.00579352	-0.0569673	-0.0722546	0.0639526	0.147052	0.220736	-0.243008	-0.206574	-0.168526	-0.0244741	-0.0129877	0.0340473	-0.0339917	-0.012395	-0.449218	-0.280753	-0.156848	0.200309	0.125322	0.308656	-0.0276218	-0.326726	-0.171781	0.00132111	-0.171564	-0.0546756	0.289086	-0.167778	-0.295612	0.116671	0.0717294	-0.0940435	0.0680083	-0.0264235	0.43954	0.226363	-0.0692994	-0.0898085	-0.107386	0.0314887	-0.275223	0.0577061	-0.0395318	-0.0202699	0.0980926
QYNX	-0.553543	-0.00358716	0.351899	0.00919405	0.17773	0.0205679	0.0566309	-0.175788	0.234978	0.000522238	0.128509	0.0687475	0.00500903	0.151882	0.131579	0.0324735	0.0161914	0.311728	0.195384	0.259696	0.280497	-0.0461897	-0.204579	-0.0992476	-0.0167552	0.0818867	0.16534	-0.464062	0.193568	0.0537755	0.0828385	-0.279526	0.0074881	0.376426	0.0210694	0.303017	-0.0406071	0.235031	-0.300771	0.127282	0.22327	-0.065737	0.115557	0.118721	0.409703	-0.121271	-0.0949126	-0.244239	0.0886322
QYNX	-0.519536	0.308223	-0.0114382	0.0114712	-0.249115	0.140979	-0.0878847	0.0384022	0.268858	0.0953728	0.333958	-0.00406814	-0.2213	-0.242453	-0.210235	-0.0169401	-0.23635	0.135826	-0.203274	-0.157708	0.136597	-0.101196	0.330753	0.0789801	-0.313709	0.112119	-0.0394009	-0.0964889	-0.313187	-0.283229	-0.182148	-0.0183321	-0.0929815	-0.338992	-0.0163883	0.0690154	-0.0381505	-0.0662995	0.0968154	-0.152375	0.0517484	-0.293799	0.136715	0.270872	-0.0468183	0.261052	-0.0347512	-0.0420661	0.157767
QYNX	0.154227	-0.0819735	-0.578494	0.162322	0.313347	-0.386578	-0.132939	0.247601	-0.0853705	0.418681	0.131131	0.116087	0.0109912	-0.0505677	0.0564263	-0.0101624	0.441177	-0.449599	0.0242074	0.537156	-0.0836721	0.0329321	-0.282681	-0.0803455	-0.0549182	0.142088	0.0892433	0.187002	0.102681	-0.352547	0.273332	0.12886	0.216222	-0.318909	0.0809685	-0.0562449	-0.0916253	-0.144543	-0.300877	0.124311	-0.217124	0.308193	0.201671	0.1451	0.138227	0.271571	-0.169817	-0.0248436	-0.286337
QYNX	-0.391638	0.160025	0.282175	-0.328904	0.280707	0.254034	0.0665844	0.103292	-0.226231	0.025726	-0.0303445	0.232751	0.15962	0.231295	-0.174161	0.0438899	0.275728	0.333934	0.259588	-0.00182926	0.137091	0.300503	0.0591013	0.0979215	0.208583	-0.0413057	0.208548	0.300106	-0.0325776	-0.219315	-0.131926	0.0483324	0.158279	0.0973962	0.0889658	0.26386	0.220476	0.328161	0.0193459	0.0610689	-0.0548668	-0.0286093	0.200223	0.064406	-0.398716	-0.254112	-0.111586	0.00838051	0.012623
QYNX	0.0664526	0.0340646	0.0545942	-0.0475479	0.128675	-0.0925277	0.223985	-0.313272	-0.453397	0.143001	-0.379281	-0.354723	0.209598	-0.134125	0.0245647	-0.248162	-0.0652401	-0.422192	-0.0747464	-0.2521	-0.206704	-0.104567	-0.056232	-0.190949	-0.245959	-0.080799	-0.412599	0.0421284	0.117053	0.0730249	0.0195631	0.30009	0.0240478	-0.123451	-0.0641515	0.0147205	-0.203847	0.187258	-0.110089	-0.155755	0.532647	0.153251	-0.035854	-0.249379	0.0560553	-0.253611	0.318371	0.0276649	0.193308
QYNX	-0.286992	-0.133744	-0.0548563	0.252697	-0.0753767	0.273225	-0.0821153	-0.0781017	0.21657	0.162	-0.0771677	-0.178345	-0.0116709	0.438995	0.0266217	-0.533184	-0.111694	0.142755	0.00834221	0.400822	0.119094	0.319455	0.208087	0.155488	0.264359	0.0437947	-0.311728	-0.0208082	-0.108067	0.0341315	-0.121885	0.278409	-0.261982	0.300668	0.289461	-0.462965	-0.0234135	-0.262795	-0.0409783	0.202117	-0.137245	-0.0348964	0.242494	0.00778482	-0.224331	-8.04166e-05	0.0640697	0.157054	0.116653
QYNX	-0.502093	0.0748144	0.173944	0.134011	0.274186	-0.247499	0.327289	-0.00667826	-0.0108174	-0.194918	0.278034	0.215023	0.552906	-0.113307	0.130276	0.162961	-0.336817	0.351785	0.168266	0.0669431	-0.571695	-0.00297517	-0.402464	0.142089	-0.305666	0.190324	0.137838	0.0153947	0.0537229	0.146514	0.162651	-0.0468557	-0.210941	0.252718	-0.216089	-0.0233102	-0.0725108	0.386102	0.0375157	0.223042	-0.0910753	-0.0514033	-0.201565	-0.243732	0.0228145	0.36381	0.0785383	0.0334218	-0.195908
QYNX	-0.326713	0.336419	0.36226	0.051778	-0.459335	-0.112451	0.00509803	0.0078675	0.109208	-0.389509	-0.0246768	-0.09845	-0.379249	-0.0493343	0.00371297	0.172596	0.457155	0.00426901	0.142753	0.0392382	0.207404	-0.128398	0.0813276	-0.263144	-0.0480341	0.153837	0.145694	0.0412321	-0.0675811	-0.206923	-0.0766639	0.435582	-0.245861	-0.0610207	-0.0964926	-0.0927952	-0.040173	-0.34351	0.480178	-0.0239376	-0.2174	-0.358312	-0.255426	0.159381	0.221353	-0.188243	-0.0148885	-0.0670519	-0.121215
QYNX	-0.26826	0.225918	0.115349	0.16019	0.108845	0.168753	0.0505978	0.194237	-0.196333	0.0936256	-0.246777	0.114507	0.0474569	-0.372345	-0.206836	0.106865	-0.346552	-0.0570601	-0.181984	-0.0242151	0.286999	0.257467	0.242109	-0.127824	0.217346	0.0728003	0.230761	-0.251894	0.0410676	0.296635	-0.306221	-0.302664	0.270184	-0.228724	0.069503	-0.224371	0.148506	0.106924	-0.345394	0.0210866	-0.297549	-0.125575	-0.180881	-0.173262	0.230783	-0.0216646	0.118313	-0.155966	-0.0386887
QYNX	-0.331601	-0.0542058	0.287434	-0.0672306	0.546548	0.105805	0.0637406	0.240972	-0.0115236	-0.222184	-0.231208	0.0536747	0.23525	0.199106	0.0970892	0.286748	0.358702	0.107702	0.222365	0.236944	-0.230877	-0.0964281	0.159833	-0.157274	0.452975	0.125297	-0.014006	0.0645391	-0.397651	-0.0397022	0.094793	0.107688	0.0607205	-0.20446	-0.11873	0.225016	-0.0970943	-0.262614	0.0945531	-0.219506	0.117178	-0.118084	0.1006	0.0654597	-0.0464249	-0.0699605	0.106195	-0.123397	0.208286
QYNX	-0.111468	-0.0522396	0.13335	0.177816	-0.24723	0.00166503	0.199429	-0.2516	0.234514	0.15245	0.21521	0.116983	-0.333152	0.109389	-0.0716252	0.158417	0.120726	-0.0300186	-0.160298	0.306408	0.117702	-0.364739	-0.0213759	0.13965	-0.150088	0.26781	-0.289077	0.262962	0.147274	-0.00453966	0.214205	-0.139579	0.129919	-0.142543	-0.105308	0.173994	0.144386	0.0507607	0.0480347	0.0163052	-0.126264	0.146028	0.252122	0.366596	-0.198684	-0.291222	0.144387	0.302368	-0.0701192
QYNX	-0.551701	-0.0600144	-0.230761	-0.0101789	0.342174	0.0112598	0.0727181	-0.248031	-0.253412	-0.115062	0.227545	0.0685917	0.186724	-0.434936	0.105135	-0.225959	-0.0943189	-0.54449	-0.169015	-0.106609	0.139127	0.0214562	-0.371784	-0.0641783	-0.0578749	-0.00105655	-0.113404	-0.292355	0.0305689	-0.164474	-0.0472718	0.0547775	-0.385749	-0.0293734	0.0376893	-0.117077	-0.282943	0.0435241	-0.119801	-0.139027	-0.104951	0.126717	0.06869	0.033524	-0.035044	-0.164051	-0.523973	0.25578	0.18804
QYNX	-0.0395684	-0.0684659	0.156093	-0.389887	-0.225333	0.206041	-0.486154	0.633627	-0.221858	-0.105249	0.0233491	-0.0112171	0.0663367	0.157239	0.394131	0.250992	-0.218083	-0.026108	0.0197031	0.0083404	-0.210954	0.0728823	-0.0357575	0.08923	-0.0187969	-0.144499	-0.303819	0.120791	-0.315178	-0.164705	0.0401761	-0.254261	-0.0626085	-0.33806	0.0872634	0.194212	0.0666959	-0.110851	-0.0777583	0.45109	-0.243939	0.329687	-0.255465	-0.0345332	-0.0327395	-0.0938291	-0.0162673	-0.0947228	-0.0251212
QYNX	-0.303619	-0.0575258	0.398871	-0.396565	-0.300475	-0.037559	0.293849	-0.159128	0.0282416	-0.140439	-0.397248	0.0511872	0.0699239	-0.188452	0.102071	-0.427029	-0.227516	-0.165569	0.110113	-0.21242	-0.0506564	0.097376	0.176502	0.00429061	-0.115718	-0.0426059	-0.090844	0.12888	-0.0215884	-0.00532806	0.271817	0.0589216	0.23856	0.111182	0.0482565	-0.257656	0.026514	-0.0108994	-0.104583	0.0294067	-0.0278975	-0.318402	0.231654	0.125333	0.0936749	-0.199442	-0.250394	-0.0820096	-0.194169
QYNX	-0.379672	0.357954	0.0685971	0.585041	-0.0288093	-0.0335113	0.118691	-0.430111	0.409815	0.515103	0.199798	-0.114672	-0.132239	0.23809	-0.0495275	0.0985425	0.287244	0.0141439	-0.275985	-0.139557	-0.202041	-0.202037	-0.519389	0.209182	0.341206	0.0826529	0.225006	-0.577482	-0.0866632	-0.166409	-0.12324	-0.246922	0.195654	-0.0987429	0.444878	0.0998707	-0.0516596	0.188831	0.261555	0.00725082	-0.056197	0.124056	-0.227109	0.250073	-0.0580003	-0.0449929	-0.0602298	-0.297566	0.12612
QYNX	-0.172762	-0.012246	0.0881687	-0.231084	-0.205448	0.0277057	0.0830211	0.00815787	0.103622	0.0608188	0.170986	-0.0475042	-0.0638147	0.367983	0.0458362	-0.091307	-0.160528	-0.18097	0.382967	0.364319	-0.19701	0.260001	-0.355558	0.242889	-0.289666	-0.133599	-0.0168435	0.339429	-0.0470805	0.286725	0.224193	0.0864003	-0.168098	-0.124342	-0.245228	0.0766761	0.223138	-0.0097936	-0.00848737	0.00873273	-0.0292826	0.0207903	0.104102	0.138853	0.128972	0.0549837	0.0389993	0.0607053	0.00190413
QYNX	-0.259316	0.186993	0.357919	0.21259	0.118042	-0.290112	0.228371	0.357872	-0.0825916	-0.0408891	-0.0955826	-0.533549	-0.304754	0.0166673	-0.351856	-0.208688	0.377813	0.275334	0.134798	-0.00749483	0.0502396	-0.0219741	0.280464	0.273407	-0.00453522	0.339958	-0.521502	0.124876	-0.0670622	0.0558638	-0.263394	-0.240122	0.326293	-0.0240985	-0.0285563	0.099646	0.169313	0.00886426	-0.169118	-0.30816	0.1358	0.283183	-0.202638	0.0381484	-0.022633	0.0729415	-0.101099	0.11284	0.00492357
QYNX	-0.0952789	0.139593	-0.237726	-0.11606	0.230774	0.224845	0.0228826	-0.0894998	0.0594845	0.245432	-0.00389183	-0.0759668	-0.0124986	-0.576808	-0.250508	0.177804	0.21784	-0.290545	0.0641902	0.0869587	0.201557	-0.0806553	-0.213853	0.138811	-0.436594	-0.184759	-0.120812	-0.0764756	-0.104512	-0.180993	0.179198	-0.14022	-0.0165779	0.00347572	-0.118239	-0.225551	-0.22123	-0.0438369	-0.335581	0.502058	-0.167673	-0.128357	-0.183517	-0.0186154	-0.361048	-0.117458	0.310892	0.0295276	0.0331181
QYNX	-0.40088	0.144162	0.340676	-0.213635	0.292249	-0.0840359	-0.268463	0.194997	-0.223937	0.160474	-0.404802	-0.311953	0.179787	-0.0996441	-0.0770979	0.166646	-0.263055	-0.180714	0.18838	-0.0875484	-0.0248441	0.158267	-0.0798014	0.0477502	0.162906	0.252179	0.0667348	-0.0171409	-0.261649	0.132264	0.115104	-0.034423	0.00601061	0.246781	-0.258527	-0.0491301	0.140089	-0.316023	0.158335	-0.313705	-0.321493	0.250018	-0.214458	-0.132069	-0.142533	-0.0889133	0.163999	-0.110503	-0.0364084
QYNX	-0.250109	0.0213186	0.26323	-0.319674	0.0940321	0.166079	0.339674	0.107606	-0.230372	-0.0749146	0.2314	0.217804	-0.12185	-0.218313	-0.323073	0.309234	-0.00714945	0.0860852	0.0727343	-0.10274	0.462752	0.277735	-0.299461	-0.329111	-0.311172	-0.18879	-0.0138414	0.0149168	-0.18019	-0.0441699	-0.345119	0.153551	0.157809	-0.0483641	0.295022	-0.242921	0.178413	-0.11283	-0.123786	0.0761854	0.227769	-0.0653244	0.0697543	-0.0154106	-0.0293936	0.103768	0.114121	0.0894825	-0.0344179
QYNX	-0.537421	-0.173699	0.172235	-0.0233675	0.0865318	0.139477	-0.0218534	-0.122123	0.210602	-0.169897	0.130953	-0.0423403	-0.305424	0.176331	0.186233	0.0885999	-0.059444	0.114001	0.009358	0.0464585	0.0429084	-0.327798	-0.0933623	0.147924	-0.219932	0.209606	0.00399127	-0.297368	0.006535	0.00173169	-0.190106	0.104556	-0.0959454	0.108912	0.23692	0.0657255	-0.08498	-0.117665	0.162996	0.177397	0.150084	-0.0255337	0.200788	-0.0972073	0.177708	0.279804	0.0178252	-0.0298431	0.073445
QYNX	-0.602603	0.139625	0.0333454	0.0153263	0.260429	0.0857889	-0.150535	0.125704	0.211392	0.0447455	0.219046	0.0666977	-0.22796	-0.0904558	-0.0505742	-0.0787446	0.0511261	-0.214076	0.0676359	-0.13162	0.023175	0.0653889	-0.143965	-0.0723555	0.203232	-0.319759	-0.110856	-0.00266955	0.194103	-0.316974	-0.0835925	0.0448663	-0.0650539	-0.0135411	0.117302	0.10006	0.147477	0.0720438	-0.109535	-0.0707659	0.0636076	-0.163629	-0.0134354	-0.218292	-0.184279	-0.20797	-0.269555	-0.0205654	0.0314752
QYNX	-0.482584	0.0236713	0.36117	-0.316503	0.0659111	0.253593	-0.0324586	0.0685806	0.206062	0.0520353	-0.0810526	0.0404481	-0.146069	-0.0133702	-0.0892123	-0.0699777	-0.183493	-0.190779	0.136179	0.14681	-0.0414286	-0.0606386	0.0953016	0.0970301	-0.0630224	0.192547	-0.177137	-0.0920985	0.113727	0.0970424	0.020813	-0.0657105	-0.0491943	0.0464416	-0.00767111	-0.00525153	0.0160176	-0.16754	-0.00886748	0.0368138	-0.200223	-0.091415	0.115819	-0.0317114	-0.0483732	-0.0871476	0.0969526	0.0856006	-0.0023653
[truncated: 58 more columns]

## Sheet: 0-1
151	108	6	21	23	16	9	13	26	1	108
			PLJN	TSMJ	PLJC	QYXF	PLLT	QYNX
		E1	E2	E3	E4	E5	E6	E7	E8	E9	E10	E11	E12	E13	E14	E15	E16	E17	E18	E19	E20	E21	E22	E23	E24	E25	E26	E27	E28	E29	E30	E31	E32	E33	E34	E35	E36	E37	E38	E39	E40	E41	E42	E43	E44	E45	E46	E47	E48
PLJN-1	PLJN	0	1	1	0	0	0	1	0	0	0	0	0	0	0	1	1	0	1	0	0	1	0	0	0	1	0	1	0	1	1	0	0	0	0	1	1	0	1	1	1	0	1	1	1	0	0	0	0
PLJN-2	PLJN	1	0	0	0	0	1	1	0	0	0	0	0	0	0	1	1	0	1	1	0	1	0	1	0	1	0	1	0	1	1	0	0	1	0	1	1	0	0	1	1	1	0	0	0	0	1	0	0
PLJN-3	PLJN	0	1	1	1	0	0	1	0	0	0	0	1	0	0	1	1	0	1	0	1	1	0	0	0	1	0	1	0	1	1	0	0	1	1	1	1	0	0	1	1	0	1	1	1	0	0	0	1
PLJN-4	PLJN	0	1	1	0	0	0	1	0	1	0	0	0	1	0	1	1	0	1	0	1	0	0	0	0	1	1	0	1	0	0	0	0	0	0	0	1	0	0	0	0	0	0	1	0	1	1	1	1
PLJN-5	PLJN	0	1	1	0	0	0	1	0	0	0	0	0	0	0	1	1	0	1	0	1	1	0	0	0	1	0	1	0	1	1	1	0	1	0	1	1	0	0	1	1	0	1	1	1	0	0	0	0
PLJN-6	PLJN	1	0	1	0	0	0	0	1	0	0	0	0	0	1	1	1	0	0	0	1	1	0	0	0	1	0	0	1	0	1	0	0	0	1	1	1	0	0	1	0	1	1	0	1	0	0	1	0
PLJN-7	PLJN	0	1	0	0	0	0	1	0	0	1	0	0	0	0	1	1	1	1	0	1	1	0	1	0	1	1	1	0	1	0	0	0	1	0	1	0	0	0	0	1	0	1	1	0	0	0	0	0
PLJN-8	PLJN	0	1	1	0	0	0	0	0	0	0	0	0	0	0	0	1	0	0	0	1	1	0	0	0	1	1	1	0	1	1	0	1	0	0	1	1	0	1	1	1	0	1	1	0	1	1	1	1
PLJN-9	PLJN	0	1	1	0	1	0	1	0	0	0	0	0	0	1	1	1	0	1	0	1	1	0	1	0	1	0	0	0	0	0	0	0	1	0	0	1	1	0	0	1	0	0	1	1	0	0	0	0
PLJN-10	PLJN	0	1	1	0	0	0	1	0	0	0	1	0	0	0	1	0	0	1	0	0	0	0	0	0	0	0	1	0	1	1	1	0	0	0	1	0	0	0	1	0	0	0	0	1	0	0	0	0
PLJN-11	PLJN	0	1	1	0	0	0	1	0	0	0	0	0	0	0	1	1	1	1	1	0	1	0	0	1	1	0	1	0	1	1	0	0	1	0	1	1	0	0	1	1	0	1	1	0	0	0	1	0
PLJN-12	PLJN	1	0	1	0	1	0	1	0	0	0	0	1	0	0	1	1	0	1	0	0	1	0	1	0	1	1	0	0	1	1	0	1	0	0	1	1	0	0	1	1	0	1	1	1	0	0	1	1
PLJN-13	PLJN	0	1	1	1	0	0	1	0	0	0	0	0	0	0	1	1	0	0	0	1	1	0	0	1	0	0	1	1	1	1	1	0	1	0	1	1	0	0	1	0	1	1	1	1	0	0	0	0
PLJN-14	PLJN	0	1	1	0	0	0	1	0	0	0	0	0	1	0	1	1	1	1	0	1	1	0	1	0	1	1	1	0	1	1	0	0	1	1	1	1	1	0	0	1	0	0	1	1	0	0	1	0
PLJN-15	PLJN	0	1	1	0	0	0	1	0	0	0	0	0	0	0	1	1	0	0	0	1	1	1	0	1	1	0	1	0	1	1	0	0	0	0	1	1	0	0	1	0	0	1	0	0	1	1	0	1
PLJN-16	PLJN	1	1	1	0	0	0	1	1	0	0	0	0	0	1	1	1	0	0	0	1	1	0	0	0	1	1	1	0	1	1	0	0	1	0	0	0	0	0	0	1	0	0	1	1	0	0	0	0
PLJN-17	PLJN	0	1	0	0	0	0	1	0	0	1	0	0	0	0	1	1	0	1	0	1	1	0	0	1	0	0	0	0	1	1	0	0	0	0	1	1	0	0	1	0	0	1	0	1	0	0	0	0
PLJN-18	PLJN	0	1	1	0	0	0	1	0	1	0	0	0	0	0	0	1	0	1	0	1	1	0	0	0	1	0	1	1	0	1	1	0	1	1	1	1	0	0	1	1	0	1	1	1	0	0	1	0
PLJN-19	PLJN	0	0	0	0	1	0	1	0	0	0	0	0	0	0	1	1	0	1	0	1	1	0	1	1	1	1	1	0	1	1	0	0	1	0	1	1	1	1	1	1	0	1	1	0	0	0	1	1
PLJN-20	PLJN	0	1	1	0	0	1	1	0	0	0	0	0	0	0	1	1	0	0	0	0	0	0	1	0	1	0	1	0	1	1	0	0	1	0	1	1	0	0	1	0	0	1	1	1	1	0	0	0
PLJN-21	PLJN	0	0	1	0	1	0	1	0	0	0	0	0	0	0	1	1	0	1	0	1	1	0	0	0	1	0	1	0	1	1	0	0	0	0	1	1	0	0	1	1	0	1	1	1	0	0	0	0
TSMJ-1	TSMJ	0	1	1	0	0	0	1	0	0	0	0	1	1	0	1	1	0	1	0	1	1	0	0	0	1	0	1	0	1	1	0	0	0	0	1	1	0	0	1	1	0	1	1	1	0	0	0	0
TSMJ-2	TSMJ	1	1	1	0	0	0	1	0	0	0	0	0	0	0	1	1	0	1	0	1	1	0	0	0	1	0	0	0	1	1	0	0	0	0	1	1	0	1	0	1	0	1	1	0	0	1	0	0
TSMJ-3	TSMJ	0	0	0	0	0	0	1	0	0	0	0	0	0	0	1	1	0	1	0	0	1	0	0	0	1	0	1	0	1	1	0	0	0	0	1	1	1	0	1	0	1	1	1	1	0	0	0	0
TSMJ-4	TSMJ	1	1	1	1	0	0	1	0	0	0	0	0	0	0	1	1	0	1	1	1	0	0	0	0	1	0	1	0	1	1	0	0	0	0	1	1	0	0	1	1	0	1	1	0	1	0	0	0
TSMJ-5	TSMJ	0	1	1	0	0	0	0	0	0	0	0	1	0	0	1	1	0	1	0	1	1	0	0	0	1	1	1	1	1	1	0	1	0	0	1	1	0	1	0	1	0	1	1	1	0	1	0	0
TSMJ-6	TSMJ	0	0	1	0	0	0	0	0	0	1	0	0	0	1	1	1	1	1	0	1	1	0	0	1	1	0	1	0	0	1	0	0	0	0	1	1	0	0	1	0	1	1	1	0	0	0	0	0
TSMJ-7	TSMJ	1	1	0	0	0	0	1	1	0	0	0	0	0	0	1	1	0	1	0	1	0	0	1	0	1	0	1	1	1	1	0	0	1	1	1	1	0	0	1	1	0	1	1	1	0	0	0	0
TSMJ-8	TSMJ	0	1	1	0	0	0	1	0	1	0	0	0	0	0	1	1	0	1	0	1	1	0	0	0	1	0	0	0	1	0	0	0	0	0	1	1	0	0	0	1	0	1	1	1	1	1	0	0
TSMJ-9	TSMJ	0	1	1	0	0	0	1	1	0	1	0	1	1	0	1	1	0	1	0	1	1	0	0	0	0	0	1	0	1	1	1	0	0	0	1	1	0	0	1	0	1	0	1	1	0	0	0	0
TSMJ-10	TSMJ	1	1	1	1	0	0	1	0	0	0	0	0	0	0	0	0	0	1	1	0	1	0	0	0	1	0	1	0	0	1	0	0	0	0	1	0	0	0	1	1	0	1	1	1	0	0	0	0
TSMJ-11	TSMJ	0	1	1	0	0	0	0	0	0	0	0	1	0	0	1	1	0	1	0	1	1	0	0	0	1	0	1	0	1	1	1	0	1	0	1	1	0	0	1	1	0	1	1	1	0	1	0	0
TSMJ-12	TSMJ	1	1	1	0	0	0	1	0	0	0	0	0	0	0	1	1	0	1	0	1	1	1	0	0	1	0	1	0	1	1	1	0	0	1	1	1	0	0	1	1	0	1	1	1	0	0	0	0
TSMJ-13	TSMJ	0	0	1	1	0	0	1	0	0	0	0	0	0	0	1	1	0	1	0	1	1	0	0	0	0	0	1	0	0	1	0	0	0	0	1	1	1	1	0	1	0	1	1	1	0	1	1	0
TSMJ-14	TSMJ	1	1	1	0	0	0	1	0	0	0	0	0	0	0	1	1	0	1	0	1	1	0	0	0	1	1	0	0	1	1	0	1	0	0	1	1	0	1	0	1	0	1	1	0	0	0	0	0
TSMJ-15	TSMJ	0	1	1	0	0	0	1	0	0	0	1	1	0	0	1	1	1	1	0	1	0	0	1	1	0	0	1	1	1	1	0	0	0	1	1	1	0	0	1	1	0	1	1	1	0	1	0	0
TSMJ-16	TSMJ	0	0	1	0	0	0	1	0	0	1	0	0	0	1	1	1	0	1	0	1	1	0	0	0	1	0	1	0	1	1	1	0	0	0	1	1	0	0	1	0	1	1	1	1	0	1	0	0
TSMJ-17	TSMJ	1	1	1	0	0	0	1	1	0	0	0	0	1	1	0	1	0	0	0	1	1	0	0	0	1	0	1	1	1	1	0	0	0	0	1	1	0	0	1	1	0	1	1	1	0	0	0	0
TSMJ-18	TSMJ	0	1	0	0	0	0	0	0	1	0	0	0	0	0	1	1	0	1	0	1	1	0	0	0	0	0	1	0	1	1	1	0	0	0	1	1	0	0	1	1	0	1	1	0	0	1	0	1
TSMJ-19	TSMJ	0	1	1	0	0	0	1	1	0	0	0	1	0	0	1	1	0	1	1	1	1	0	0	0	1	0	1	0	1	1	0	0	0	0	1	1	0	1	0	1	0	1	1	1	0	0	0	0
TSMJ-20	TSMJ	1	1	1	1	0	0	1	0	0	0	0	0	0	0	1	1	0	1	0	1	1	0	0	0	1	0	0	0	1	1	0	0	1	0	1	1	0	0	1	0	1	1	1	1	0	1	0	0
TSMJ-21	TSMJ	0	1	1	0	0	0	1	0	0	0	0	1	0	0	1	0	0	1	0	1	1	0	0	0	1	0	1	0	1	1	0	0	0	0	1	1	0	0	1	1	0	1	0	1	0	0	0	0
TSMJ-22	TSMJ	0	1	1	0	0	0	1	1	0	1	0	0	0	1	1	1	0	1	0	1	1	0	0	0	1	0	1	0	1	1	0	0	0	0	1	1	0	0	1	1	0	1	1	1	0	1	0	0
TSMJ-23	TSMJ	1	1	1	1	0	0	1	0	0	0	0	0	0	0	1	1	0	1	0	1	1	0	0	0	1	0	1	0	1	1	0	0	0	0	1	1	0	0	1	1	0	1	1	1	0	0	0	0
PLJC-1	PLJC	0	0	1	0	0	0	1	1	0	0	0	0	0	1	1	1	0	1	0	1	1	0	0	0	1	0	1	1	1	1	0	0	0	0	1	1	0	1	0	1	0	1	1	1	0	0	0	0
PLJC-2	PLJC	0	1	1	0	0	0	1	0	1	0	0	1	0	0	1	1	0	1	0	1	0	0	0	0	1	0	1	0	1	1	0	0	0	1	1	1	0	1	0	1	0	1	1	1	0	0	0	0
PLJC-3	PLJC	0	1	1	0	0	0	1	0	0	0	0	0	0	0	1	1	0	1	1	1	1	0	0	0	1	0	0	0	1	1	0	0	0	0	1	1	0	0	1	1	0	1	0	1	0	1	0	0
PLJC-4	PLJC	0	1	1	0	0	0	1	0	0	0	0	0	0	0	1	1	1	1	0	1	1	0	0	0	0	0	1	0	0	0	0	0	0	1	1	1	0	0	1	1	0	1	1	1	0	0	0	0
PLJC-5	PLJC	1	1	1	1	0	0	1	0	0	0	0	0	0	0	1	1	0	1	1	0	1	0	1	1	1	0	1	0	1	1	0	0	0	0	0	0	1	0	1	1	0	1	1	0	0	1	0	0
PLJC-6	PLJC	0	1	1	0	0	0	1	0	0	0	0	1	0	1	0	0	0	1	0	1	1	0	0	0	1	0	1	0	1	1	0	0	1	0	1	1	0	0	1	1	0	1	1	1	0	0	0	0
PLJC-7	PLJC	0	1	0	0	1	0	1	0	0	0	0	0	0	0	1	1	0	1	0	1	1	0	0	0	1	0	1	0	1	1	1	0	0	0	1	1	0	1	0	1	0	0	1	1	0	1	0	0
PLJC-8	PLJC	1	1	1	0	0	0	1	0	1	1	0	0	0	1	1	1	0	1	0	1	1	0	1	0	1	0	1	1	1	1	0	0	0	0	0	1	1	0	1	0	0	1	1	1	0	0	0	0
PLJC-9	PLJC	0	1	1	0	0	0	0	0	0	0	0	0	0	0	1	1	0	1	0	1	1	0	0	0	0	0	1	0	1	1	0	0	0	0	1	1	0	1	0	1	0	1	1	1	0	0	0	0
PLJC-10	PLJC	1	1	1	0	0	0	1	0	1	0	0	0	0	0	1	1	0	0	0	1	1	0	0	0	1	0	1	1	1	1	0	0	0	0	1	1	0	0	1	1	0	1	1	1	0	1	1	1
PLJC-11	PLJC	0	1	1	1	0	0	1	0	0	0	1	0	0	0	0	1	0	1	0	1	0	0	0	0	1	1	0	0	1	0	0	1	1	1	1	1	0	0	1	1	1	1	1	1	1	0	0	0
PLJC-12	PLJC	0	1	1	0	0	0	1	1	0	0	0	0	1	0	1	1	0	1	1	1	1	0	0	0	1	0	1	0	1	1	0	0	0	0	1	1	0	0	1	0	0	1	1	1	0	0	0	0
PLJC-13	PLJC	1	0	0	0	0	0	1	0	0	1	0	0	0	1	1	0	1	1	0	1	1	1	0	0	0	0	1	0	1	1	0	0	0	1	1	1	0	1	0	1	0	1	0	1	0	0	0	0
PLJC-14	PLJC	0	0	1	0	0	0	1	0	0	0	0	0	0	1	1	1	0	1	0	1	1	0	0	0	1	0	1	0	1	1	0	0	0	0	1	0	0	0	1	1	0	1	1	1	0	0	0	0
PLJC-15	PLJC	0	1	1	0	1	0	1	1	0	0	0	0	0	1	1	1	0	1	0	1	1	0	0	0	1	0	1	0	1	1	0	0	0	1	1	1	0	1	0	1	0	1	1	1	0	1	0	0
PLJC-16	PLJC	0	0	1	0	1	0	1	0	1	0	1	1	0	0	1	1	0	1	0	1	1	0	0	0	1	0	1	1	1	1	0	0	0	1	1	1	0	0	0	1	0	1	1	1	0	0	0	0
QYXF-1	QYXF	0	0	1	0	1	0	1	0	0	1	0	0	0	1	1	1	0	1	0	1	1	0	0	0	1	0	1	0	1	1	0	0	1	1	1	1	0	1	0	1	0	1	1	1	0	0	0	0
QYXF-2	QYXF	0	0	1	1	0	0	1	0	1	0	1	0	0	0	1	1	0	1	1	1	1	0	0	0	1	0	1	0	1	1	0	0	0	0	1	1	0	0	1	1	0	1	1	1	0	0	0	0
QYXF-3	QYXF	0	1	0	1	0	0	0	0	0	0	0	1	0	1	1	1	0	1	0	1	1	0	0	1	1	0	1	0	1	1	1	0	1	0	1	1	0	0	1	0	0	1	1	1	1	0	1	0
QYXF-4	QYXF	0	1	1	0	0	0	1	0	0	0	1	0	1	0	1	1	0	1	0	1	1	0	1	0	0	0	1	0	1	1	0	0	0	0	1	0	1	0	1	1	0	1	1	1	0	0	0	0
QYXF-5	QYXF	1	1	1	0	0	0	1	1	0	1	0	1	0	0	0	0	0	1	0	1	1	1	0	0	1	1	1	1	1	0	0	0	0	0	0	1	0	1	0	1	0	1	1	1	1	1	0	0
QYXF-6	QYXF	0	1	1	1	0	0	1	0	0	0	0	0	0	0	1	1	1	1	0	1	0	0	0	0	0	0	0	0	0	1	0	1	0	0	1	1	0	0	1	1	1	1	1	0	0	1	0	0
QYXF-7	QYXF	0	1	0	0	0	0	1	0	0	0	0	0	0	1	1	1	0	0	1	0	1	0	0	0	1	0	1	0	1	1	0	0	0	0	1	1	0	1	0	1	0	0	0	1	0	0	0	1
QYXF-8	QYXF	0	1	1	0	1	0	1	0	0	1	1	0	0	0	1	1	0	1	0	1	1	0	0	0	1	0	1	0	1	1	0	0	0	1	1	1	0	0	1	1	0	1	1	1	0	0	0	0
QYXF-9	QYXF	0	1	1	0	0	0	1	0	0	0	0	0	0	0	1	1	0	1	0	1	1	0	0	0	1	0	1	1	1	1	0	0	0	1	1	1	0	0	1	1	0	1	1	1	0	0	0	0
PLLT-1	PLLT	0	0	1	0	0	0	1	1	0	1	0	0	0	0	1	1	0	1	1	1	1	0	0	0	1	0	1	1	1	1	0	0	0	0	1	1	0	1	1	1	0	1	1	1	0	0	0	0
PLLT-2	PLLT	0	1	0	1	0	0	1	0	0	0	0	0	0	0	1	1	0	1	0	1	1	0	0	0	1	0	1	0	1	1	0	0	1	0	1	0	0	0	1	1	0	1	1	1	0	1	0	0
PLLT-3	PLLT	0	1	1	0	0	0	1	1	0	0	0	0	1	0	0	1	0	1	0	1	1	0	0	0	0	0	1	0	1	1	0	0	0	0	1	1	0	0	1	1	0	1	1	1	0	0	0	0
PLLT-4	PLLT	0	1	1	0	0	0	1	0	0	0	0	0	0	0	0	1	0	1	1	1	1	0	0	0	1	0	1	0	1	1	1	1	0	1	0	1	0	0	0	1	0	0	1	1	0	0	0	0
PLLT-5	PLLT	0	1	0	0	0	0	0	0	0	1	1	0	0	0	1	0	0	0	0	1	0	0	0	0	0	0	1	1	1	1	0	0	0	0	1	1	0	0	1	1	0	1	0	1	0	0	0	1
PLLT-6	PLLT	0	1	1	0	0	0	1	0	0	0	0	0	0	0	1	1	0	1	0	0	1	1	0	0	1	1	1	0	0	0	0	0	0	0	1	0	1	0	1	1	1	0	1	1	0	1	0	0
PLLT-7	PLLT	1	1	1	0	0	0	1	0	0	0	1	0	0	1	1	1	0	1	0	1	1	0	0	0	1	0	1	0	1	1	0	0	0	0	1	1	0	1	0	0	0	1	1	0	1	0	0	0
PLLT-8	PLLT	0	1	1	0	0	0	1	1	1	0	0	0	1	0	1	1	1	1	0	1	1	0	1	0	1	0	0	0	1	1	0	1	1	1	1	1	0	0	1	1	0	0	1	1	0	0	1	0
PLLT-9	PLLT	0	1	1	0	1	0	1	0	0	0	0	1	0	0	1	1	0	1	0	1	1	0	0	0	1	1	1	0	1	0	1	0	0	0	1	1	0	0	1	1	0	1	1	1	0	0	0	0
PLLT-10	PLLT	1	1	0	0	0	0	0	0	0	1	0	0	0	0	1	0	0	0	0	0	0	0	0	1	1	0	1	0	0	1	0	0	0	0	1	1	0	0	1	0	0	1	1	1	0	1	0	0
PLLT-11	PLLT	0	0	1	0	1	0	1	0	1	0	0	0	0	0	1	1	0	1	0	1	1	0	0	0	1	0	1	0	1	1	0	0	1	0	1	1	0	0	1	1	0	1	1	1	0	0	0	0
PLLT-12	PLLT	0	1	1	1	0	0	1	0	0	0	0	0	0	0	1	1	0	1	1	1	1	0	0	0	1	0	1	0	1	1	0	0	0	0	1	1	0	0	0	1	0	1	1	1	0	0	0	0
PLLT-13	PLLT	0	1	1	0	0	0	1	0	0	0	0	0	0	0	1	1	0	1	0	1	1	0	0	0	1	0	1	0	1	1	0	0	0	0	1	1	0	0	1	1	0	1	1	1	0	0	0	0
QYNX-1	QYNX	0	1	1	0	0	0	1	1	0	0	0	0	0	0	0	1	0	0	0	1	1	0	0	0	1	0	1	0	1	1	0	0	0	0	1	1	0	1	1	1	0	1	1	1	0	0	0	0
QYNX-2	QYNX	0	1	1	0	0	0	1	0	0	0	0	0	0	0	1	1	0	1	0	1	1	0	0	0	1	0	1	0	1	1	0	0	0	0	1	1	0	0	1	1	0	1	1	1	0	0	0	0
QYNX-3	QYNX	0	1	1	1	0	0	1	0	1	0	0	0	0	1	1	1	0	1	0	1	1	0	0	0	1	0	1	0	1	1	0	0	1	0	0	1	0	1	1	1	0	1	1	1	0	1	0	0
QYNX-4	QYNX	0	1	1	0	1	0	1	0	0	0	0	0	0	0	1	1	0	1	0	0	1	0	0	0	1	0	0	1	1	1	0	0	0	0	1	0	0	0	0	1	0	1	1	1	0	0	0	0
QYNX-5	QYNX	0	1	1	1	0	0	1	0	0	0	0	1	0	0	1	1	1	1	0	1	1	0	0	0	1	0	1	0	1	1	0	0	0	0	1	1	0	0	1	1	0	1	1	1	0	0	0	0
QYNX-6	QYNX	0	1	0	0	0	0	1	0	0	0	0	0	0	1	1	1	0	1	0	1	1	0	0	0	1	1	0	0	1	1	0	1	1	0	1	1	0	0	1	1	0	1	1	0	0	0	0	0
QYNX-7	QYNX	0	1	1	0	0	0	0	1	0	0	0	0	1	0	1	0	0	1	0	1	1	0	0	0	1	0	1	0	1	1	0	0	0	0	1	1	0	0	0	1	0	0	1	1	0	0	0	0
QYNX-8	QYNX	0	1	1	0	0	0	1	0	0	0	0	0	0	0	1	1	0	1	0	1	0	1	0	1	1	0	1	1	1	0	0	0	0	1	1	1	1	0	1	1	0	1	1	1	0	1	0	0
QYNX-9	QYNX	1	1	1	1	0	0	1	0	0	0	0	0	0	0	1	1	0	1	0	1	0	0	0	0	1	0	1	0	0	1	1	0	0	0	1	1	0	1	1	0	0	0	1	1	0	0	0	0
QYNX-10	QYNX	0	0	0	0	0	0	1	0	1	0	0	0	0	1	1	1	0	0	1	1	1	0	0	0	1	0	0	0	1	1	0	0	0	0	1	1	0	0	1	1	0	1	1	1	0	0	0	0
QYNX-11	QYNX	0	1	1	0	0	0	1	0	0	1	0	0	0	0	1	1	0	1	0	1	1	0	0	0	1	0	1	0	1	1	0	0	0	1	1	1	0	0	1	1	1	0	1	0	0	0	0	0
QYNX-12	QYNX	0	1	1	1	0	0	1	0	0	0	0	0	0	0	1	1	0	1	0	1	1	1	1	0	1	0	1	1	1	1	0	0	0	0	1	1	0	0	1	0	0	1	1	1	1	0	1	0
QYNX-13	QYNX	1	1	1	0	0	0	1	0	0	0	0	0	0	1	1	1	0	1	1	1	0	0	0	0	0	1	1	0	1	1	0	0	0	0	1	1	0	0	0	1	0	1	1	0	0	0	0	0
QYNX-14	QYNX	0	1	1	0	0	0	0	0	0	0	1	0	1	0	1	1	0	1	0	0	1	0	0	0	1	0	0	0	1	1	0	0	0	0	1	1	0	1	1	1	0	1	0	1	0	0	0	0
QYNX-15	QYNX	0	0	1	0	0	0	1	0	1	0	0	0	0	0	0	0	0	1	0	1	1	0	0	0	1	0	1	0	1	1	1	0	0	0	1	1	0	0	1	1	0	1	1	1	0	1	0	0
QYNX-16	QYNX	0	1	1	1	1	0	1	0	0	0	0	0	0	0	1	1	0	1	0	1	1	1	0	0	0	0	0	0	1	1	0	0	1	0	1	1	0	0	1	1	1	0	1	1	0	0	0	0
QYNX-17	QYNX	0	1	1	1	0	0	1	0	0	0	0	0	0	0	1	1	0	1	0	1	1	0	0	0	1	0	1	0	1	1	0	0	0	0	1	1	0	0	1	1	0	1	1	1	0	0	0	1
QYNX-18	QYNX	0	1	1	0	0	0	1	0	0	0	1	0	0	0	1	1	0	1	0	1	1	0	0	0	1	0	1	0	1	1	1	0	0	0	0	0	0	1	1	1	0	1	1	0	0	0	0	0
QYNX-19	QYNX	0	1	1	1	1	0	1	0	0	0	0	0	0	0	1	1	0	0	0	1	1	0	0	0	1	0	0	0	1	1	0	0	0	0	1	1	0	0	1	1	0	1	1	1	0	0	0	0
QYNX-20	QYNX	0	1	1	0	0	0	1	0	0	0	1	0	0	0	1	1	1	1	0	1	1	0	0	1	1	0	1	0	1	1	0	0	0	1	1	1	1	1	0	1	0	1	1	1	0	0	0	0
QYNX-21	QYNX	0	1	1	0	0	0	0	0	0	0	0	0	1	0	1	1	0	1	0	1	1	1	1	0	1	0	1	0	1	1	0	1	0	0	1	1	0	0	1	1	0	1	1	1	0	0	0	0
QYNX-22	QYNX	1	1	1	0	1	0	1	0	0	1	0	0	0	0	1	1	0	1	1	1	1	0	0	0	1	1	1	1	1	1	0	0	0	0	1	1	0	1	1	1	0	1	1	1	0	0	0	0
QYNX-23	QYNX	0	0	1	0	0	0	1	0	0	0	0	0	0	0	1	1	0	1	0	1	1	1	0	0	1	0	1	0	0	1	0	0	0	0	1	1	0	0	1	1	0	0	1	1	0	1	0	0
QYNX-24	QYNX	0	1	1	0	0	0	1	1	1	0	1	0	0	0	1	1	0	1	0	0	1	0	0	0	1	0	1	0	1	1	0	0	0	0	1	1	0	1	1	1	0	1	1	1	0	0	0	0
QYNX-25	QYNX	0	1	1	0	0	0	1	0	0	0	0	0	0	0	0	0	0	1	0	1	1	0	0	0	1	0	1	0	1	1	0	0	0	1	1	1	0	0	1	1	0	1	1	1	0	0	0	0
QYNX-26	QYNX	1	1	1	1	1	0	1	0	0	0	0	0	0	0	1	1	0	1	0	1	1	0	0	0	1	0	1	0	1	1	0	0	0	0	1	1	0	1	1	1	0	1	1	1	0	0	0	0
[truncated: 254 more columns]

## Sheet: Fst
Results of Analysis of Molecular Variance
Input as Allelic Distance Matrix for F-Statistics Analysis
Data Sheet	0-1
Data Title
No. Samples	108
No. Pops	6
No. Regions	1
No. Permutations	999	No. PW Pop Permutations	999
N0	35.2296
SSTOT	5161.24
Pop	PLJN	TSMJ	PLJC	QYXF	PLLT	QYNX
n	42	46	32	18	26	52
SSWP	1112.81	1014.85	715.75	443.056	589.154	1092.27
Summary AMOVA Table
Source	df	SS	MS	Est. Var.	%
Among Pops	5	193.355	38.671	0.654404	0.0205114
Among Indiv	102	1592.89	15.6165	0	0
Within Indiv	108	3375	31.25	31.25	0.979489
Total	215	5161.24		31.9044	1
F-Statistics	Value	P(rand >= data)
Fst	0.0271676	0.002
Fis	-0.333574	1
Fit	-0.297344	1
Fst max	0.689418
F'st	0.0394066
Nm	8.95214
Probability, P(rand >= data), for Fst, Fis and Fit is based on standard permutation across the full data set.
Fst = AP / (WI + AI + AP) = AP / TOT
Fis = AI / (WI + AI)
Fit = (AI + AP) / (WI + AI + AP) = (AI + AP) / TOT
Nm = [(1 / Fst) - 1] / 4
Key: AP = Est. Var. Among Pops, AI = Est. Var. Among Individuals, WI = Est. Var. Within Individuals
Warning! Negative Among Individuals. Est. Var. of -7.817 converted to zero for pie chart presentation!

## Sheet: FstPV
AMOVA F-Statistics Random Values List.
Input as Allelic Distance Matrix for F-Statistics Analysis
Data Sheet	0-1
Data Title
No. Samples	108
No. Pops	6
No. Regions	1
No. Permutations	999	No. PW Pop Permutations	999
AMOVA F-Statistics results for 999 permutations plus observed value, showing every 10th value. Sorted on Fst
Fit	Fis	Fst
0.0527088	0.0639551	-0.0120146
0.0134566	0.023357	-0.0101372
0.0119997	0.0214188	-0.00962528
0.0144449	0.0232395	-0.00900382
-0.0592547	-0.0501539	-0.00866615
0.00681065	0.0150083	-0.00832257
0.0200652	0.0278418	-0.0079993
-0.0183111	-0.0104628	-0.0077671
-0.00312744	0.0043594	-0.00751963
0.0105108	0.0176022	-0.00721853
0.0163637	0.0232413	-0.00704118
0.0749689	0.0812385	-0.00682396
0.00945086	0.0160089	-0.00666473
-0.00254951	0.00394657	-0.00652181
-0.0102907	-0.00384327	-0.00642279
-0.00560881	0.000674462	-0.00628751
0.0378901	0.0436273	-0.00599883
-0.0264801	-0.0204947	-0.00586517
-0.0233532	-0.0175041	-0.00574846
-0.0497099	-0.0438745	-0.00559016
-0.0391884	-0.0336375	-0.00537023
-0.0209238	-0.0156162	-0.00522608
0.0206026	0.0255809	-0.00510903
-0.0600595	-0.0548422	-0.00494597
-0.0577048	-0.0526354	-0.00481594
-0.0662068	-0.0612842	-0.00463834
-0.0335908	-0.0289305	-0.00452927
0.0226748	0.0269478	-0.00439141
-0.00949207	-0.00518948	-0.00428038
-0.00016109	0.0039828	-0.00416046
-0.0129481	-0.00881235	-0.0040996
0.0181041	0.0219667	-0.00394937
-0.00357767	0.000194669	-0.00377307
-0.047376	-0.0436064	-0.00361206
-0.017101	-0.013542	-0.00351139
-0.0139761	-0.0105446	-0.00339565
-0.00504351	-0.001712	-0.00332582
-0.025186	-0.021911	-0.00320476
0.00934441	0.0124123	-0.0031064
0.0275943	0.0304525	-0.00294804
-0.0231679	-0.0203128	-0.00279823
0.0272491	0.0298862	-0.00271836
-0.0180794	-0.0154856	-0.0025542
-0.00952226	-0.00708999	-0.00241515
-0.0769866	-0.0744996	-0.00231451
-0.0164528	-0.0142591	-0.0021628
0.049464	0.051395	-0.00203567
0.0351611	0.0369378	-0.00184485
-0.0058754	-0.00427722	-0.00159137
-0.0457951	-0.0442155	-0.00151271
-0.0608922	-0.059435	-0.0013754
0.071296	0.0724732	-0.00126915
0.0194024	0.0205221	-0.00114321
-0.032513	-0.0314687	-0.00101241
0.0101566	0.0109968	-0.000849569
-0.0057145	-0.00496143	-0.000749357
0.011381	0.011895	-0.000520176
-0.0366485	-0.0362796	-0.000356016
-0.0416443	-0.041505	-0.000133814
-0.0272561	-0.0273571	9.83423e-05
-0.000877857	-0.00110504	0.000226932
0.052226	0.0518548	0.000391509
0.00188815	0.00137961	0.000509241
0.0352273	0.0346196	0.000629432
-0.0391452	-0.0399177	0.000742858
0.013203	0.0122849	0.000929448
0.0310466	0.0300142	0.00106432
-0.0231468	-0.0244769	0.00129841
-0.0215659	-0.023057	0.00145751
-0.0254101	-0.0270687	0.00161485
0.0211381	0.0192384	0.00193694
0.0254783	0.0231643	0.00236886
0.0262756	0.0238427	0.00249235
-0.0434277	-0.0461497	0.00260194
0.00116637	-0.00166777	0.00282942
-0.0204902	-0.0235681	0.00300698
-0.00301829	-0.00626504	0.00322653
0.0214265	0.0180023	0.00348699
0.0338448	0.0303091	0.00364628
0.00371152	-0.000287392	0.00399776
-0.0136649	-0.0179952	0.00425378
-0.00159938	-0.00620366	0.00457589
0.00120886	-0.00390269	0.00509169
-0.0134604	-0.018875	0.00531424
0.0183534	0.0127352	0.00569058
-0.0257106	-0.0319351	0.00603185
0.00879845	0.00248035	0.00633381
-0.0143616	-0.0211659	0.00666324
0.0371979	0.0302575	0.00715696
0.0102198	0.00252366	0.00771559
0.0103246	0.00206946	0.0082723
-0.0476345	-0.0568393	0.00870967
0.0298537	0.0207604	0.00928606
0.0469898	0.0374067	0.00995554
-0.0143054	-0.0255477	0.0109622
-0.028389	-0.0410103	0.0121241
0.0630032	0.0506274	0.0130357
0.0489428	0.0351138	0.0143323
0.0132247	-0.00227459	0.0154641
0.0406968	0.0232861	0.0178258

## Sheet: FstFD
Frequency Distribution of Random Fst versus Observed Fst for 999 Permutations
Input as Allelic Distance Matrix for F-Statistics Analysis
Data Sheet	0-1
Data Title
No. Samples	108
No. Pops	6
No. Regions	1
No. Permutations	999	No. PW Pop Permutations	999
Frequency Distribution of Fst
Frequency (-1 To 1)			Frequency (-0.5 To 0.5)			Frequency (-0.25 To 0.25)
Fst	Permute Fst	DataFst	Fst	Permute Fst	DataFst	Fst	Permute Fst	DataFst
-1	0	0	-0.5	0	0	-0.25	0	0
-0.96	0	0	-0.48	0	0	-0.24	0	0
-0.92	0	0	-0.46	0	0	-0.23	0	0
-0.88	0	0	-0.44	0	0	-0.22	0	0
-0.84	0	0	-0.42	0	0	-0.21	0	0
-0.8	0	0	-0.4	0	0	-0.2	0	0
-0.76	0	0	-0.38	0	0	-0.19	0	0
-0.72	0	0	-0.36	0	0	-0.18	0	0
-0.68	0	0	-0.34	0	0	-0.17	0	0
-0.64	0	0	-0.32	0	0	-0.16	0	0
-0.6	0	0	-0.3	0	0	-0.15	0	0
-0.56	0	0	-0.28	0	0	-0.14	0	0
-0.52	0	0	-0.26	0	0	-0.13	0	0
-0.48	0	0	-0.24	0	0	-0.12	0	0
-0.44	0	0	-0.22	0	0	-0.11	0	0
-0.4	0	0	-0.2	0	0	-0.1	0	0
-0.36	0	0	-0.18	0	0	-0.09	0	0
-0.32	0	0	-0.16	0	0	-0.08	0	0
-0.28	0	0	-0.14	0	0	-0.07	0	0
-0.24	0	0	-0.12	0	0	-0.06	0	0
-0.2	0	0	-0.1	0	0	-0.05	0	0
-0.16	0	0	-0.08	0	0	-0.04	0	0
-0.12	0	0	-0.06	0	0	-0.03	0	0
-0.08	0	0	-0.04	0	0	-0.02	14	0
-0.04	584	0	-0.02	584	0	-0.01	570	0
3.46945e-16	415	1	1.73472e-16	409	0	8.67362e-17	347	0
0.04	0	0	0.02	6	1	0.01	62	0
0.08	0	0	0.04	0	0	0.02	5	1
0.12	0	0	0.06	0	0	0.03	1	0
0.16	0	0	0.08	0	0	0.04	0	0
0.2	0	0	0.1	0	0	0.05	0	0
0.24	0	0	0.12	0	0	0.06	0	0
0.28	0	0	0.14	0	0	0.07	0	0
0.32	0	0	0.16	0	0	0.08	0	0
0.36	0	0	0.18	0	0	0.09	0	0
0.4	0	0	0.2	0	0	0.1	0	0
0.44	0	0	0.22	0	0	0.11	0	0
0.48	0	0	0.24	0	0	0.12	0	0
0.52	0	0	0.26	0	0	0.13	0	0
0.56	0	0	0.28	0	0	0.14	0	0
0.6	0	0	0.3	0	0	0.15	0	0
0.64	0	0	0.32	0	0	0.16	0	0
0.68	0	0	0.34	0	0	0.17	0	0
0.72	0	0	0.36	0	0	0.18	0	0
0.76	0	0	0.38	0	0	0.19	0	0
0.8	0	0	0.4	0	0	0.2	0	0
0.84	0	0	0.42	0	0	0.21	0	0
0.88	0	0	0.44	0	0	0.22	0	0
0.92	0	0	0.46	0	0	0.23	0	0
0.96	0	0	0.48	0	0	0.24	0	0
1	0	0	0.5	0	0	0.25	0	0

## Sheet: FstP
1	6
	0-1	Pairwise Population Fst Values
PLJN	TSMJ	PLJC	QYXF	PLLT	QYNX
0	0.003	0.007	0.025	0.011	0.002	PLJN
0.0525217	0	0.132	0.155	0.115	0.056	TSMJ
0.0559278	0.0164023	0	0.356	0.326	0.334	PLJC
0.0416777	0.0173782	0	0	0.349	0.334	QYXF
0.0465743	0.0191199	0	0	0	0.307	PLLT
0.0642437	0.026642	0	0	0	0	QYNX
Fst Values below diagonal.
