# Supplementary material for: Genetic diversity of Venturia inaequalis isolates from the scabs in apple trees in Gansu Province, China, using AFLP markers
Source: PeerJ journal article supplement (doi:10.7717/peerj.14512), 2022-12-16
Supplement: Peer_J_data.zip [file Fig 5,Fig 6.xlsx]

## Sheet: 0-1
151	108	6	21	23	16	9	13	26
			PLJN	TSMJ	PLJC	QYXF	PLLT	QYNX
		E1	E2	E3	E4	E5	E6	E7	E8	E9	E10	E11	E12	E13	E14	E15	E16	E17	E18	E19	E20	E21	E22	E23	E24	E25	E26	E27	E28	E29	E30	E31	E32	E33	E34	E35	E36	E37	E38	E39	E40	E41	E42	E43	E44	E45	E46	E47	E48
PLJN-1	PLJN	0	1	1	0	0	0	1	0	0	0	0	0	0	0	1	1	0	1	0	0	1	0	0	0	1	0	1	0	1	1	0	0	0	0	1	1	0	1	1	1	0	1	1	1	0	0	0	0
PLJN-2	PLJN	1	0	0	0	0	1	1	0	0	0	0	0	0	0	1	1	0	1	1	0	1	0	1	0	1	0	1	0	1	1	0	0	1	0	1	1	0	0	1	1	1	0	0	0	0	1	0	0
PLJN-3	PLJN	0	1	1	1	0	0	1	0	0	0	0	1	0	0	1	1	0	1	0	1	1	0	0	0	1	0	1	0	1	1	0	0	1	1	1	1	0	0	1	1	0	1	1	1	0	0	0	1
PLJN-4	PLJN	0	1	1	0	0	0	1	0	1	0	0	0	1	0	1	1	0	1	0	1	0	0	0	0	1	1	0	1	0	0	0	0	0	0	0	1	0	0	0	0	0	0	1	0	1	1	1	1
PLJN-5	PLJN	0	1	1	0	0	0	1	0	0	0	0	0	0	0	1	1	0	1	0	1	1	0	0	0	1	0	1	0	1	1	1	0	1	0	1	1	0	0	1	1	0	1	1	1	0	0	0	0
PLJN-6	PLJN	1	0	1	0	0	0	0	1	0	0	0	0	0	1	1	1	0	0	0	1	1	0	0	0	1	0	0	1	0	1	0	0	0	1	1	1	0	0	1	0	1	1	0	1	0	0	1	0
PLJN-7	PLJN	0	1	0	0	0	0	1	0	0	1	0	0	0	0	1	1	1	1	0	1	1	0	1	0	1	1	1	0	1	0	0	0	1	0	1	0	0	0	0	1	0	1	1	0	0	0	0	0
PLJN-8	PLJN	0	1	1	0	0	0	0	0	0	0	0	0	0	0	0	1	0	0	0	1	1	0	0	0	1	1	1	0	1	1	0	1	0	0	1	1	0	1	1	1	0	1	1	0	1	1	1	1
PLJN-9	PLJN	0	1	1	0	1	0	1	0	0	0	0	0	0	1	1	1	0	1	0	1	1	0	1	0	1	0	0	0	0	0	0	0	1	0	0	1	1	0	0	1	0	0	1	1	0	0	0	0
PLJN-10	PLJN	0	1	1	0	0	0	1	0	0	0	1	0	0	0	1	0	0	1	0	0	0	0	0	0	0	0	1	0	1	1	1	0	0	0	1	0	0	0	1	0	0	0	0	1	0	0	0	0
PLJN-11	PLJN	0	1	1	0	0	0	1	0	0	0	0	0	0	0	1	1	1	1	1	0	1	0	0	1	1	0	1	0	1	1	0	0	1	0	1	1	0	0	1	1	0	1	1	0	0	0	1	0
PLJN-12	PLJN	1	0	1	0	1	0	1	0	0	0	0	1	0	0	1	1	0	1	0	0	1	0	1	0	1	1	0	0	1	1	0	1	0	0	1	1	0	0	1	1	0	1	1	1	0	0	1	1
PLJN-13	PLJN	0	1	1	1	0	0	1	0	0	0	0	0	0	0	1	1	0	0	0	1	1	0	0	1	0	0	1	1	1	1	1	0	1	0	1	1	0	0	1	0	1	1	1	1	0	0	0	0
PLJN-14	PLJN	0	1	1	0	0	0	1	0	0	0	0	0	1	0	1	1	1	1	0	1	1	0	1	0	1	1	1	0	1	1	0	0	1	1	1	1	1	0	0	1	0	0	1	1	0	0	1	0
PLJN-15	PLJN	0	1	1	0	0	0	1	0	0	0	0	0	0	0	1	1	0	0	0	1	1	1	0	1	1	0	1	0	1	1	0	0	0	0	1	1	0	0	1	0	0	1	0	0	1	1	0	1
PLJN-16	PLJN	1	1	1	0	0	0	1	1	0	0	0	0	0	1	1	1	0	0	0	1	1	0	0	0	1	1	1	0	1	1	0	0	1	0	0	0	0	0	0	1	0	0	1	1	0	0	0	0
PLJN-17	PLJN	0	1	0	0	0	0	1	0	0	1	0	0	0	0	1	1	0	1	0	1	1	0	0	1	0	0	0	0	1	1	0	0	0	0	1	1	0	0	1	0	0	1	0	1	0	0	0	0
PLJN-18	PLJN	0	1	1	0	0	0	1	0	1	0	0	0	0	0	0	1	0	1	0	1	1	0	0	0	1	0	1	1	0	1	1	0	1	1	1	1	0	0	1	1	0	1	1	1	0	0	1	0
PLJN-19	PLJN	0	0	0	0	1	0	1	0	0	0	0	0	0	0	1	1	0	1	0	1	1	0	1	1	1	1	1	0	1	1	0	0	1	0	1	1	1	1	1	1	0	1	1	0	0	0	1	1
PLJN-20	PLJN	0	1	1	0	0	1	1	0	0	0	0	0	0	0	1	1	0	0	0	0	0	0	1	0	1	0	1	0	1	1	0	0	1	0	1	1	0	0	1	0	0	1	1	1	1	0	0	0
PLJN-21	PLJN	0	0	1	0	1	0	1	0	0	0	0	0	0	0	1	1	0	1	0	1	1	0	0	0	1	0	1	0	1	1	0	0	0	0	1	1	0	0	1	1	0	1	1	1	0	0	0	0
TSMJ-1	TSMJ	0	1	1	0	0	0	1	0	0	0	0	1	1	0	1	1	0	1	0	1	1	0	0	0	1	0	1	0	1	1	0	0	0	0	1	1	0	0	1	1	0	1	1	1	0	0	0	0
TSMJ-2	TSMJ	1	1	1	0	0	0	1	0	0	0	0	0	0	0	1	1	0	1	0	1	1	0	0	0	1	0	0	0	1	1	0	0	0	0	1	1	0	1	0	1	0	1	1	0	0	1	0	0
TSMJ-3	TSMJ	0	0	0	0	0	0	1	0	0	0	0	0	0	0	1	1	0	1	0	0	1	0	0	0	1	0	1	0	1	1	0	0	0	0	1	1	1	0	1	0	1	1	1	1	0	0	0	0
TSMJ-4	TSMJ	1	1	1	1	0	0	1	0	0	0	0	0	0	0	1	1	0	1	1	1	0	0	0	0	1	0	1	0	1	1	0	0	0	0	1	1	0	0	1	1	0	1	1	0	1	0	0	0
TSMJ-5	TSMJ	0	1	1	0	0	0	0	0	0	0	0	1	0	0	1	1	0	1	0	1	1	0	0	0	1	1	1	1	1	1	0	1	0	0	1	1	0	1	0	1	0	1	1	1	0	1	0	0
TSMJ-6	TSMJ	0	0	1	0	0	0	0	0	0	1	0	0	0	1	1	1	1	1	0	1	1	0	0	1	1	0	1	0	0	1	0	0	0	0	1	1	0	0	1	0	1	1	1	0	0	0	0	0
TSMJ-7	TSMJ	1	1	0	0	0	0	1	1	0	0	0	0	0	0	1	1	0	1	0	1	0	0	1	0	1	0	1	1	1	1	0	0	1	1	1	1	0	0	1	1	0	1	1	1	0	0	0	0
TSMJ-8	TSMJ	0	1	1	0	0	0	1	0	1	0	0	0	0	0	1	1	0	1	0	1	1	0	0	0	1	0	0	0	1	0	0	0	0	0	1	1	0	0	0	1	0	1	1	1	1	1	0	0
TSMJ-9	TSMJ	0	1	1	0	0	0	1	1	0	1	0	1	1	0	1	1	0	1	0	1	1	0	0	0	0	0	1	0	1	1	1	0	0	0	1	1	0	0	1	0	1	0	1	1	0	0	0	0
TSMJ-10	TSMJ	1	1	1	1	0	0	1	0	0	0	0	0	0	0	0	0	0	1	1	0	1	0	0	0	1	0	1	0	0	1	0	0	0	0	1	0	0	0	1	1	0	1	1	1	0	0	0	0
TSMJ-11	TSMJ	0	1	1	0	0	0	0	0	0	0	0	1	0	0	1	1	0	1	0	1	1	0	0	0	1	0	1	0	1	1	1	0	1	0	1	1	0	0	1	1	0	1	1	1	0	1	0	0
TSMJ-12	TSMJ	1	1	1	0	0	0	1	0	0	0	0	0	0	0	1	1	0	1	0	1	1	1	0	0	1	0	1	0	1	1	1	0	0	1	1	1	0	0	1	1	0	1	1	1	0	0	0	0
TSMJ-13	TSMJ	0	0	1	1	0	0	1	0	0	0	0	0	0	0	1	1	0	1	0	1	1	0	0	0	0	0	1	0	0	1	0	0	0	0	1	1	1	1	0	1	0	1	1	1	0	1	1	0
TSMJ-14	TSMJ	1	1	1	0	0	0	1	0	0	0	0	0	0	0	1	1	0	1	0	1	1	0	0	0	1	1	0	0	1	1	0	1	0	0	1	1	0	1	0	1	0	1	1	0	0	0	0	0
TSMJ-15	TSMJ	0	1	1	0	0	0	1	0	0	0	1	1	0	0	1	1	1	1	0	1	0	0	1	1	0	0	1	1	1	1	0	0	0	1	1	1	0	0	1	1	0	1	1	1	0	1	0	0
TSMJ-16	TSMJ	0	0	1	0	0	0	1	0	0	1	0	0	0	1	1	1	0	1	0	1	1	0	0	0	1	0	1	0	1	1	1	0	0	0	1	1	0	0	1	0	1	1	1	1	0	1	0	0
TSMJ-17	TSMJ	1	1	1	0	0	0	1	1	0	0	0	0	1	1	0	1	0	0	0	1	1	0	0	0	1	0	1	1	1	1	0	0	0	0	1	1	0	0	1	1	0	1	1	1	0	0	0	0
TSMJ-18	TSMJ	0	1	0	0	0	0	0	0	1	0	0	0	0	0	1	1	0	1	0	1	1	0	0	0	0	0	1	0	1	1	1	0	0	0	1	1	0	0	1	1	0	1	1	0	0	1	0	1
TSMJ-19	TSMJ	0	1	1	0	0	0	1	1	0	0	0	1	0	0	1	1	0	1	1	1	1	0	0	0	1	0	1	0	1	1	0	0	0	0	1	1	0	1	0	1	0	1	1	1	0	0	0	0
TSMJ-20	TSMJ	1	1	1	1	0	0	1	0	0	0	0	0	0	0	1	1	0	1	0	1	1	0	0	0	1	0	0	0	1	1	0	0	1	0	1	1	0	0	1	0	1	1	1	1	0	1	0	0
TSMJ-21	TSMJ	0	1	1	0	0	0	1	0	0	0	0	1	0	0	1	0	0	1	0	1	1	0	0	0	1	0	1	0	1	1	0	0	0	0	1	1	0	0	1	1	0	1	0	1	0	0	0	0
TSMJ-22	TSMJ	0	1	1	0	0	0	1	1	0	1	0	0	0	1	1	1	0	1	0	1	1	0	0	0	1	0	1	0	1	1	0	0	0	0	1	1	0	0	1	1	0	1	1	1	0	1	0	0
TSMJ-23	TSMJ	1	1	1	1	0	0	1	0	0	0	0	0	0	0	1	1	0	1	0	1	1	0	0	0	1	0	1	0	1	1	0	0	0	0	1	1	0	0	1	1	0	1	1	1	0	0	0	0
PLJC-1	PLJC	0	0	1	0	0	0	1	1	0	0	0	0	0	1	1	1	0	1	0	1	1	0	0	0	1	0	1	1	1	1	0	0	0	0	1	1	0	1	0	1	0	1	1	1	0	0	0	0
PLJC-2	PLJC	0	1	1	0	0	0	1	0	1	0	0	1	0	0	1	1	0	1	0	1	0	0	0	0	1	0	1	0	1	1	0	0	0	1	1	1	0	1	0	1	0	1	1	1	0	0	0	0
PLJC-3	PLJC	0	1	1	0	0	0	1	0	0	0	0	0	0	0	1	1	0	1	1	1	1	0	0	0	1	0	0	0	1	1	0	0	0	0	1	1	0	0	1	1	0	1	0	1	0	1	0	0
PLJC-4	PLJC	0	1	1	0	0	0	1	0	0	0	0	0	0	0	1	1	1	1	0	1	1	0	0	0	0	0	1	0	0	0	0	0	0	1	1	1	0	0	1	1	0	1	1	1	0	0	0	0
PLJC-5	PLJC	1	1	1	1	0	0	1	0	0	0	0	0	0	0	1	1	0	1	1	0	1	0	1	1	1	0	1	0	1	1	0	0	0	0	0	0	1	0	1	1	0	1	1	0	0	1	0	0
PLJC-6	PLJC	0	1	1	0	0	0	1	0	0	0	0	1	0	1	0	0	0	1	0	1	1	0	0	0	1	0	1	0	1	1	0	0	1	0	1	1	0	0	1	1	0	1	1	1	0	0	0	0
PLJC-7	PLJC	0	1	0	0	1	0	1	0	0	0	0	0	0	0	1	1	0	1	0	1	1	0	0	0	1	0	1	0	1	1	1	0	0	0	1	1	0	1	0	1	0	0	1	1	0	1	0	0
PLJC-8	PLJC	1	1	1	0	0	0	1	0	1	1	0	0	0	1	1	1	0	1	0	1	1	0	1	0	1	0	1	1	1	1	0	0	0	0	0	1	1	0	1	0	0	1	1	1	0	0	0	0
PLJC-9	PLJC	0	1	1	0	0	0	0	0	0	0	0	0	0	0	1	1	0	1	0	1	1	0	0	0	0	0	1	0	1	1	0	0	0	0	1	1	0	1	0	1	0	1	1	1	0	0	0	0
PLJC-10	PLJC	1	1	1	0	0	0	1	0	1	0	0	0	0	0	1	1	0	0	0	1	1	0	0	0	1	0	1	1	1	1	0	0	0	0	1	1	0	0	1	1	0	1	1	1	0	1	1	1
PLJC-11	PLJC	0	1	1	1	0	0	1	0	0	0	1	0	0	0	0	1	0	1	0	1	0	0	0	0	1	1	0	0	1	0	0	1	1	1	1	1	0	0	1	1	1	1	1	1	1	0	0	0
PLJC-12	PLJC	0	1	1	0	0	0	1	1	0	0	0	0	1	0	1	1	0	1	1	1	1	0	0	0	1	0	1	0	1	1	0	0	0	0	1	1	0	0	1	0	0	1	1	1	0	0	0	0
PLJC-13	PLJC	1	0	0	0	0	0	1	0	0	1	0	0	0	1	1	0	1	1	0	1	1	1	0	0	0	0	1	0	1	1	0	0	0	1	1	1	0	1	0	1	0	1	0	1	0	0	0	0
PLJC-14	PLJC	0	0	1	0	0	0	1	0	0	0	0	0	0	1	1	1	0	1	0	1	1	0	0	0	1	0	1	0	1	1	0	0	0	0	1	0	0	0	1	1	0	1	1	1	0	0	0	0
PLJC-15	PLJC	0	1	1	0	1	0	1	1	0	0	0	0	0	1	1	1	0	1	0	1	1	0	0	0	1	0	1	0	1	1	0	0	0	1	1	1	0	1	0	1	0	1	1	1	0	1	0	0
PLJC-16	PLJC	0	0	1	0	1	0	1	0	1	0	1	1	0	0	1	1	0	1	0	1	1	0	0	0	1	0	1	1	1	1	0	0	0	1	1	1	0	0	0	1	0	1	1	1	0	0	0	0
QYXF-1	QYXF	0	0	1	0	1	0	1	0	0	1	0	0	0	1	1	1	0	1	0	1	1	0	0	0	1	0	1	0	1	1	0	0	1	1	1	1	0	1	0	1	0	1	1	1	0	0	0	0
QYXF-2	QYXF	0	0	1	1	0	0	1	0	1	0	1	0	0	0	1	1	0	1	1	1	1	0	0	0	1	0	1	0	1	1	0	0	0	0	1	1	0	0	1	1	0	1	1	1	0	0	0	0
QYXF-3	QYXF	0	1	0	1	0	0	0	0	0	0	0	1	0	1	1	1	0	1	0	1	1	0	0	1	1	0	1	0	1	1	1	0	1	0	1	1	0	0	1	0	0	1	1	1	1	0	1	0
QYXF-4	QYXF	0	1	1	0	0	0	1	0	0	0	1	0	1	0	1	1	0	1	0	1	1	0	1	0	0	0	1	0	1	1	0	0	0	0	1	0	1	0	1	1	0	1	1	1	0	0	0	0
QYXF-5	QYXF	1	1	1	0	0	0	1	1	0	1	0	1	0	0	0	0	0	1	0	1	1	1	0	0	1	1	1	1	1	0	0	0	0	0	0	1	0	1	0	1	0	1	1	1	1	1	0	0
QYXF-6	QYXF	0	1	1	1	0	0	1	0	0	0	0	0	0	0	1	1	1	1	0	1	0	0	0	0	0	0	0	0	0	1	0	1	0	0	1	1	0	0	1	1	1	1	1	0	0	1	0	0
QYXF-7	QYXF	0	1	0	0	0	0	1	0	0	0	0	0	0	1	1	1	0	0	1	0	1	0	0	0	1	0	1	0	1	1	0	0	0	0	1	1	0	1	0	1	0	0	0	1	0	0	0	1
QYXF-8	QYXF	0	1	1	0	1	0	1	0	0	1	1	0	0	0	1	1	0	1	0	1	1	0	0	0	1	0	1	0	1	1	0	0	0	1	1	1	0	0	1	1	0	1	1	1	0	0	0	0
QYXF-9	QYXF	0	1	1	0	0	0	1	0	0	0	0	0	0	0	1	1	0	1	0	1	1	0	0	0	1	0	1	1	1	1	0	0	0	1	1	1	0	0	1	1	0	1	1	1	0	0	0	0
PLLT-1	PLLT	0	0	1	0	0	0	1	1	0	1	0	0	0	0	1	1	0	1	1	1	1	0	0	0	1	0	1	1	1	1	0	0	0	0	1	1	0	1	1	1	0	1	1	1	0	0	0	0
PLLT-2	PLLT	0	1	0	1	0	0	1	0	0	0	0	0	0	0	1	1	0	1	0	1	1	0	0	0	1	0	1	0	1	1	0	0	1	0	1	0	0	0	1	1	0	1	1	1	0	1	0	0
PLLT-3	PLLT	0	1	1	0	0	0	1	1	0	0	0	0	1	0	0	1	0	1	0	1	1	0	0	0	0	0	1	0	1	1	0	0	0	0	1	1	0	0	1	1	0	1	1	1	0	0	0	0
PLLT-4	PLLT	0	1	1	0	0	0	1	0	0	0	0	0	0	0	0	1	0	1	1	1	1	0	0	0	1	0	1	0	1	1	1	1	0	1	0	1	0	0	0	1	0	0	1	1	0	0	0	0
PLLT-5	PLLT	0	1	0	0	0	0	0	0	0	1	1	0	0	0	1	0	0	0	0	1	0	0	0	0	0	0	1	1	1	1	0	0	0	0	1	1	0	0	1	1	0	1	0	1	0	0	0	1
PLLT-6	PLLT	0	1	1	0	0	0	1	0	0	0	0	0	0	0	1	1	0	1	0	0	1	1	0	0	1	1	1	0	0	0	0	0	0	0	1	0	1	0	1	1	1	0	1	1	0	1	0	0
PLLT-7	PLLT	1	1	1	0	0	0	1	0	0	0	1	0	0	1	1	1	0	1	0	1	1	0	0	0	1	0	1	0	1	1	0	0	0	0	1	1	0	1	0	0	0	1	1	0	1	0	0	0
PLLT-8	PLLT	0	1	1	0	0	0	1	1	1	0	0	0	1	0	1	1	1	1	0	1	1	0	1	0	1	0	0	0	1	1	0	1	1	1	1	1	0	0	1	1	0	0	1	1	0	0	1	0
PLLT-9	PLLT	0	1	1	0	1	0	1	0	0	0	0	1	0	0	1	1	0	1	0	1	1	0	0	0	1	1	1	0	1	0	1	0	0	0	1	1	0	0	1	1	0	1	1	1	0	0	0	0
PLLT-10	PLLT	1	1	0	0	0	0	0	0	0	1	0	0	0	0	1	0	0	0	0	0	0	0	0	1	1	0	1	0	0	1	0	0	0	0	1	1	0	0	1	0	0	1	1	1	0	1	0	0
PLLT-11	PLLT	0	0	1	0	1	0	1	0	1	0	0	0	0	0	1	1	0	1	0	1	1	0	0	0	1	0	1	0	1	1	0	0	1	0	1	1	0	0	1	1	0	1	1	1	0	0	0	0
PLLT-12	PLLT	0	1	1	1	0	0	1	0	0	0	0	0	0	0	1	1	0	1	1	1	1	0	0	0	1	0	1	0	1	1	0	0	0	0	1	1	0	0	0	1	0	1	1	1	0	0	0	0
PLLT-13	PLLT	0	1	1	0	0	0	1	0	0	0	0	0	0	0	1	1	0	1	0	1	1	0	0	0	1	0	1	0	1	1	0	0	0	0	1	1	0	0	1	1	0	1	1	1	0	0	0	0
QYNX-1	QYNX	0	1	1	0	0	0	1	1	0	0	0	0	0	0	0	1	0	0	0	1	1	0	0	0	1	0	1	0	1	1	0	0	0	0	1	1	0	1	1	1	0	1	1	1	0	0	0	0
QYNX-2	QYNX	0	1	1	0	0	0	1	0	0	0	0	0	0	0	1	1	0	1	0	1	1	0	0	0	1	0	1	0	1	1	0	0	0	0	1	1	0	0	1	1	0	1	1	1	0	0	0	0
QYNX-3	QYNX	0	1	1	1	0	0	1	0	1	0	0	0	0	1	1	1	0	1	0	1	1	0	0	0	1	0	1	0	1	1	0	0	1	0	0	1	0	1	1	1	0	1	1	1	0	1	0	0
QYNX-4	QYNX	0	1	1	0	1	0	1	0	0	0	0	0	0	0	1	1	0	1	0	0	1	0	0	0	1	0	0	1	1	1	0	0	0	0	1	0	0	0	0	1	0	1	1	1	0	0	0	0
QYNX-5	QYNX	0	1	1	1	0	0	1	0	0	0	0	1	0	0	1	1	1	1	0	1	1	0	0	0	1	0	1	0	1	1	0	0	0	0	1	1	0	0	1	1	0	1	1	1	0	0	0	0
QYNX-6	QYNX	0	1	0	0	0	0	1	0	0	0	0	0	0	1	1	1	0	1	0	1	1	0	0	0	1	1	0	0	1	1	0	1	1	0	1	1	0	0	1	1	0	1	1	0	0	0	0	0
QYNX-7	QYNX	0	1	1	0	0	0	0	1	0	0	0	0	1	0	1	0	0	1	0	1	1	0	0	0	1	0	1	0	1	1	0	0	0	0	1	1	0	0	0	1	0	0	1	1	0	0	0	0
QYNX-8	QYNX	0	1	1	0	0	0	1	0	0	0	0	0	0	0	1	1	0	1	0	1	0	1	0	1	1	0	1	1	1	0	0	0	0	1	1	1	1	0	1	1	0	1	1	1	0	1	0	0
QYNX-9	QYNX	1	1	1	1	0	0	1	0	0	0	0	0	0	0	1	1	0	1	0	1	0	0	0	0	1	0	1	0	0	1	1	0	0	0	1	1	0	1	1	0	0	0	1	1	0	0	0	0
QYNX-10	QYNX	0	0	0	0	0	0	1	0	1	0	0	0	0	1	1	1	0	0	1	1	1	0	0	0	1	0	0	0	1	1	0	0	0	0	1	1	0	0	1	1	0	1	1	1	0	0	0	0
QYNX-11	QYNX	0	1	1	0	0	0	1	0	0	1	0	0	0	0	1	1	0	1	0	1	1	0	0	0	1	0	1	0	1	1	0	0	0	1	1	1	0	0	1	1	1	0	1	0	0	0	0	0
QYNX-12	QYNX	0	1	1	1	0	0	1	0	0	0	0	0	0	0	1	1	0	1	0	1	1	1	1	0	1	0	1	1	1	1	0	0	0	0	1	1	0	0	1	0	0	1	1	1	1	0	1	0
QYNX-13	QYNX	1	1	1	0	0	0	1	0	0	0	0	0	0	1	1	1	0	1	1	1	0	0	0	0	0	1	1	0	1	1	0	0	0	0	1	1	0	0	0	1	0	1	1	0	0	0	0	0
QYNX-14	QYNX	0	1	1	0	0	0	0	0	0	0	1	0	1	0	1	1	0	1	0	0	1	0	0	0	1	0	0	0	1	1	0	0	0	0	1	1	0	1	1	1	0	1	0	1	0	0	0	0
QYNX-15	QYNX	0	0	1	0	0	0	1	0	1	0	0	0	0	0	0	0	0	1	0	1	1	0	0	0	1	0	1	0	1	1	1	0	0	0	1	1	0	0	1	1	0	1	1	1	0	1	0	0
QYNX-16	QYNX	0	1	1	1	1	0	1	0	0	0	0	0	0	0	1	1	0	1	0	1	1	1	0	0	0	0	0	0	1	1	0	0	1	0	1	1	0	0	1	1	1	0	1	1	0	0	0	0
QYNX-17	QYNX	0	1	1	1	0	0	1	0	0	0	0	0	0	0	1	1	0	1	0	1	1	0	0	0	1	0	1	0	1	1	0	0	0	0	1	1	0	0	1	1	0	1	1	1	0	0	0	1
QYNX-18	QYNX	0	1	1	0	0	0	1	0	0	0	1	0	0	0	1	1	0	1	0	1	1	0	0	0	1	0	1	0	1	1	1	0	0	0	0	0	0	1	1	1	0	1	1	0	0	0	0	0
QYNX-19	QYNX	0	1	1	1	1	0	1	0	0	0	0	0	0	0	1	1	0	0	0	1	1	0	0	0	1	0	0	0	1	1	0	0	0	0	1	1	0	0	1	1	0	1	1	1	0	0	0	0
QYNX-20	QYNX	0	1	1	0	0	0	1	0	0	0	1	0	0	0	1	1	1	1	0	1	1	0	0	1	1	0	1	0	1	1	0	0	0	1	1	1	1	1	0	1	0	1	1	1	0	0	0	0
QYNX-21	QYNX	0	1	1	0	0	0	0	0	0	0	0	0	1	0	1	1	0	1	0	1	1	1	1	0	1	0	1	0	1	1	0	1	0	0	1	1	0	0	1	1	0	1	1	1	0	0	0	0
QYNX-22	QYNX	1	1	1	0	1	0	1	0	0	1	0	0	0	0	1	1	0	1	1	1	1	0	0	0	1	1	1	1	1	1	0	0	0	0	1	1	0	1	1	1	0	1	1	1	0	0	0	0
QYNX-23	QYNX	0	0	1	0	0	0	1	0	0	0	0	0	0	0	1	1	0	1	0	1	1	1	0	0	1	0	1	0	0	1	0	0	0	0	1	1	0	0	1	1	0	0	1	1	0	1	0	0
QYNX-24	QYNX	0	1	1	0	0	0	1	1	1	0	1	0	0	0	1	1	0	1	0	0	1	0	0	0	1	0	1	0	1	1	0	0	0	0	1	1	0	1	1	1	0	1	1	1	0	0	0	0
QYNX-25	QYNX	0	1	1	0	0	0	1	0	0	0	0	0	0	0	0	0	0	1	0	1	1	0	0	0	1	0	1	0	1	1	0	0	0	1	1	1	0	0	1	1	0	1	1	1	0	0	0	0
QYNX-26	QYNX	1	1	1	1	1	0	1	0	0	0	0	0	0	0	1	1	0	1	0	1	1	0	0	0	1	0	1	0	1	1	0	0	0	0	1	1	0	1	1	1	0	1	1	1	0	0	0	0
[truncated: 254 more columns]

## Sheet: AFP
Allele Frequencies by Population for Codominant Data
Data Sheet	0-1
Data Title
No. Loci	151
No. Samples	108
No. Pops.	6
Allele Frequencies and Sample Size by Populations
Locus	Allele/n	PLJN	TSMJ	PLJC	QYXF	PLLT	QYNX
E1	N	1	9	3	1	2	4
	1	1	1	1	1	1	1
E3	N	2	5	2	2	1	8
	1	1	1	1	1	1	1
E5
E7	N	1	5	3	1	3	2
	1	1	1	1	1	1	1
E9	N	0	0	1	0	0	0
	1	0	0	1	0	0	0
E11	N	0	1	1	0	0	0
	1	0	1	1	0	0	0
E13	N	0	1	0	0	0	0
	1	0	1	0	0	0	0
E15	N	18	20	13	8	9	22
	1	1	1	1	1	1	1
E17	N	3	2	2	1	1	2
	1	1	1	1	1	1	1
E19	N	0	2	2	1	3	3
	1	0	1	1	1	1	1
E21	N	1	1	1	1	1	4
	1	1	1	1	1	1	1
E23	N	1	1	1	0	0	0
	1	1	1	1	0	0	0
E25	N	7	2	1	1	2	2
	1	1	1	1	1	1	1
E27	N	2	4	4	2	2	3
	1	1	1	1	1	1	1
E29	N	16	19	14	7	10	23
	1	1	1	1	1	1	1
E31	N	0	0	0	0	1	0
	1	0	0	0	0	1	0
E33	N	3	1	1	1	1	0
	1	1	1	1	1	1	0
E35	N	16	22	13	7	10	23
	1	1	1	1	1	1	1
E37	N	1	1	0	0	0	1
	1	1	1	0	0	0	1
E39	N	10	12	7	5	9	20
	1	1	1	1	1	1	1
E41	N	2	4	1	1	0	0
	1	1	1	1	1	0	0
E43	N	11	17	13	7	11	21
	1	1	1	1	1	1	1
E45	N	3	1	0	1	0	0
	1	1	1	0	1	0	0
E47	N	4	0	1	0	0	0
	1	1	0	1	0	0	0
E49	N	0	2	10	3	8	17
	1	0	1	1	1	1	1
E51	N	0	0	1	0	1	1
	1	0	0	1	0	1	1
E53	N	1	3	1	2	1	0
	1	1	1	1	1	1	0
E55	N	16	18	12	6	8	17
	1	1	1	1	1	1	1
E57	N	16	19	12	5	11	22
	1	1	1	1	1	1	1
E59	N	2	1	2	1	1	2
	1	1	1	1	1	1	1
E61	N	9	6	5	1	7	4
	1	1	1	1	1	1	1
E63	N	0	2	0	0	0	0
	1	0	1	0	0	0	0
E65	N	1	9	2	0	0	2
	1	1	1	1	0	0	1
E67	N	2	0	0	0	0	0
	1	1	0	0	0	0	0
E69	N	12	14	7	5	3	18
	1	1	1	1	1	1	1
E71	N	5	10	2	0	0	1
	1	1	1	1	0	0	1
E73	N	0	2	0	0	0	0
	1	0	1	0	0	0	0
E75	N	8	6	7	5	6	14
	1	1	1	1	1	1	1
E77	N	4	1	0	0	2	1
	1	1	1	0	0	1	1
E79	N	2	5	1	0	3	5
	1	1	1	1	0	1	1
E81	N	12	13	12	6	9	21
	1	1	1	1	1	1	1
E83	N	6	12	12	7	10	20
	1	1	1	1	1	1	1
E85	N	1	4	0	0	0	0
	1	1	1	0	0	0	0
E87	N	0	2	0	0	0	1
	1	0	1	0	0	0	1
E89	N	3	0	1	0	1	0
	1	1	0	1	0	1	0
E91	N	3	0	0	0	0	0
	1	1	0	0	0	0	0
E93	N	11	11	9	5	10	20
	1	1	1	1	1	1	1
E95	N	2	0	1	1	1	3
	1	1	0	1	1	1	1
E97	N	13	17	14	8	10	22
	1	1	1	1	1	1	1
E99	N	19	21	14	7	11	23
	1	1	1	1	1	1	1
E101	N	0	2	2	1	1	2
	1	0	1	1	1	1	1
E103	N	18	16	13	6	11	22
	1	1	1	1	1	1	1
E105	N	18	19	13	7	11	22
	1	1	1	1	1	1	1
E107	N	17	20	13	6	11	22
	1	1	1	1	1	1	1
E109	N	2	4	1	1	2	1
	1	1	1	1	1	1	1
E111	N	19	20	14	7	11	24
	1	1	1	1	1	1	1
E113	N	1	1	2	1	1	2
	1	1	1	1	1	1	1
E115	N	17	17	15	8	11	25
	1	1	1	1	1	1	1
E117	N	18	20	14	7	11	24
	1	1	1	1	1	1	1
E119	N	3	4	1	0	0	0
	1	1	1	1	0	0	0
E121	N	19	21	14	7	11	24
	1	1	1	1	1	1	1
E123	N	19	18	13	7	10	22
	1	1	1	1	1	1	1
E125	N	19	20	14	7	11	23
	1	1	1	1	1	1	1
E127	N	1	1	2	1	1	2
	1	1	1	1	1	1	1
E129	N	17	18	14	8	11	23
	1	1	1	1	1	1	1
E131	N	18	21	14	7	11	24
	1	1	1	1	1	1	1
E133	N	3	4	1	0	0	0
	1	1	1	1	0	0	0
E135	N	19	19	14	7	10	23
	1	1	1	1	1	1	1
E137	N	19	18	14	8	10	22
	1	1	1	1	1	1	1
E139	N	3	1	0	0	0	0
	1	1	1	0	0	0	0
E141	N	0	4	0	1	1	0
	1	0	1	0	1	1	0
E143	N	11	8	5	5	6	10
	1	1	1	1	1	1	1
E145	N	14	0	1	0	0	0
	1	1	0	1	0	0	0
E147	N	4	1	1	2	1	1
	1	1	1	1	1	1	1
E149	N	2	2	1	1	2	2
	1	1	1	1	1	1	1
E151	N	10	2	2	1	2	3
	1	1	1	1	1	1	1
E153	N	1	2	1	1	0	3
	1	1	1	1	1	0	1
E155	N	15	21	15	8	12	25
	1	1	1	1	1	1	1
E157	N	4	5	2	1	2	4
	1	1	1	1	1	1	1
E159	N	0	0	0	0	0	2
	1	0	0	0	0	0	1
E161	N	2	0	0	1	0	1
	1	1	0	0	1	0	1
E163	N	2	0	0	0	0	0
	1	1	0	0	0	0	0
E165	N	0	15	12	6	6	18
	1	0	1	1	1	1	1
E167	N	4	1	1	4	0	1
	1	1	1	1	1	0	1
E169	N	13	0	1	0	0	1
	1	1	0	1	0	0	1
E171	N	9	22	14	3	7	24
	1	1	1	1	1	1	1
E173	N	0	4	2	3	2	4
	1	0	1	1	1	1	1
E175	N	1	6	1	0	0	0
	1	1	1	1	0	0	0
E177	N	0	1	11	6	9	16
	1	0	1	1	1	1	1
E179	N	8	15	14	8	11	21
	1	1	1	1	1	1	1
E181	N	14	21	14	7	11	23
	1	1	1	1	1	1	1
E183	N	10	2	1	2	1	2
	1	1	1	1	1	1	1
E185	N	12	21	16	9	11	24
	1	1	1	1	1	1	1
E187	N	12	23	16	9	13	26
	1	1	1	1	1	1	1
E189	N	17	23	12	5	5	19
	1	1	1	1	1	1	1
E191	N	12	23	16	9	13	26
	1	1	1	1	1	1	1
E193	N	4	0	0	0	0	0
	1	1	0	0	0	0	0
E195	N	1	0	0	0	0	0
	1	1	0	0	0	0	0
E197	N	17	23	16	9	13	26
	1	1	1	1	1	1	1
E199	N	16	23	16	9	13	26
	1	1	1	1	1	1	1
E201	N	17	23	16	9	13	26
	1	1	1	1	1	1	1
E203	N	4	0	0	0	0	0
	1	1	0	0	0	0	0
E205	N	4	0	0	0	0	0
	1	1	0	0	0	0	0
E207	N	16	23	8	6	10	22
	1	1	1	1	1	1	1
E209	N	17	23	16	9	13	26
	1	1	1	1	1	1	1
E211	N	1	1	3	6	1	1
	1	1	1	1	1	1	1
E213	N	15	17	12	7	10	19
	1	1	1	1	1	1	1
E215	N	17	19	12	7	11	22
	1	1	1	1	1	1	1
E217	N	17	19	14	7	11	22
	1	1	1	1	1	1	1
E219	N	17	19	12	5	11	23
	1	1	1	1	1	1	1
E221	N	3	0	0	0	0	0
	1	1	0	0	0	0	0
E223	N	3	0	0	0	0	0
	1	1	0	0	0	0	0
E225	N	10	0	0	0	0	0
	1	1	0	0	0	0	0
E227	N	7	0	0	0	0	0
	1	1	0	0	0	0	0
E229	N	10	23	16	9	10	18
	1	1	1	1	1	1	1
E231	N	0	0	0	2	0	3
	1	0	0	0	1	0	1
E233	N	0	0	0	0	0	1
	1	0	0	0	0	0	1
E235	N	1	3	2	1	1	5
	1	1	1	1	1	1	1
E237	N	2	0	0	0	0	0
	1	1	0	0	0	0	0
E239
E241	N	0	0	4	3	3	3
	1	0	0	1	1	1	1
E243
E245	N	3	0	0	0	0	0
	1	1	0	0	0	0	0
E247	N	0	0	2	2	1	2
	1	0	0	1	1	1	1
E249	N	0	0	2	2	2	3
	1	0	0	1	1	1	1
E251	N	17	21	14	7	11	24
	1	1	1	1	1	1	1
E253	N	2	1	1	0	3	1
	1	1	1	1	0	1	1
E255	N	3	4	2	1	3	3
	1	1	1	1	1	1	1
E257	N	17	18	12	6	11	20
	1	1	1	1	1	1	1
E259	N	17	20	14	7	11	24
	1	1	1	1	1	1	1
E261	N	1	3	3	2	1	2
	1	1	1	1	1	1	1
E263	N	0	2	2	1	2	1
	1	0	1	1	1	1	1
E265	N	2	2	1	1	1	3
	1	1	1	1	1	1	1
E267	N	16	18	12	7	11	23
	1	1	1	1	1	1	1
E269	N	17	23	16	9	13	26
	1	1	1	1	1	1	1
E271
E273
E275	N	17	20	12	8	11	22
	1	1	1	1	1	1	1
E277	N	2	3	2	1	2	2
	1	1	1	1	1	1	1
E279	N	2	3	1	1	2	2
	1	1	1	1	1	1	1
E281	N	17	20	14	8	11	24
	1	1	1	1	1	1	1
E283	N	17	21	14	7	11	24
	1	1	1	1	1	1	1
E285	N	4	0	0	0	0	0
	1	1	0	0	0	0	0
E287	N	2	4	2	2	2	5
	1	1	1	1	1	1	1
E289	N	19	23	16	7	11	26
	1	1	1	1	1	1	1
E291
E293	N	2	0	0	0	0	0
	1	1	0	0	0	0	0
E295	N	0	0	4	3	1	3
	1	0	0	1	1	1	1
E297
E299	N	0	0	2	2	1	3
	1	0	0	1	1	1	1
E301	N	0	0	1	3	3	3
	1	0	0	1	1	1	1
Warning! Results should be treated with caution given the following:
There is 95% missing data at the locus 'E1' in the population 'PLJN!
There is 60% missing data at the locus 'E1' in the population 'TSMJ!
There is 81% missing data at the locus 'E1' in the population 'PLJC!
There is 88% missing data at the locus 'E1' in the population 'QYXF!
There is 84% missing data at the locus 'E1' in the population 'PLLT!
There is 84% missing data at the locus 'E1' in the population 'QYNX!
There is 90% missing data at the locus 'E3' in the population 'PLJN!
There is 78% missing data at the locus 'E3' in the population 'TSMJ!
There is 87% missing data at the locus 'E3' in the population 'PLJC!
There is 77% missing data at the locus 'E3' in the population 'QYXF!
There is 92% missing data at the locus 'E3' in the population 'PLLT!
There is 69% missing data at the locus 'E3' in the population 'QYNX!
There is 100% missing data at the locus 'E5' in the population 'PLJN!
There is 100% missing data at the locus 'E5' in the population 'TSMJ!
There is 100% missing data at the locus 'E5' in the population 'PLJC!
There is 100% missing data at the locus 'E5' in the population 'QYXF!
There is 100% missing data at the locus 'E5' in the population 'PLLT!
There is 100% missing data at the locus 'E5' in the population 'QYNX!
There is 95% missing data at the locus 'E7' in the population 'PLJN!
There is 78% missing data at the locus 'E7' in the population 'TSMJ!
There is 81% missing data at the locus 'E7' in the population 'PLJC!
There is 88% missing data at the locus 'E7' in the population 'QYXF!
There is 76% missing data at the locus 'E7' in the population 'PLLT!
There is 92% missing data at the locus 'E7' in the population 'QYNX!
There is 100% missing data at the locus 'E9' in the population 'PLJN!
There is 100% missing data at the locus 'E9' in the population 'TSMJ!
There is 93% missing data at the locus 'E9' in the population 'PLJC!
There is 100% missing data at the locus 'E9' in the population 'QYXF!
There is 100% missing data at the locus 'E9' in the population 'PLLT!
There is 100% missing data at the locus 'E9' in the population 'QYNX!
There is 100% missing data at the locus 'E11' in the population 'PLJN!
There is 95% missing data at the locus 'E11' in the population 'TSMJ!
There is 93% missing data at the locus 'E11' in the population 'PLJC!
There is 100% missing data at the locus 'E11' in the population 'QYXF!
There is 100% missing data at the locus 'E11' in the population 'PLLT!
There is 100% missing data at the locus 'E11' in the population 'QYNX!
There is 100% missing data at the locus 'E13' in the population 'PLJN!
There is 95% missing data at the locus 'E13' in the population 'TSMJ!
There is 100% missing data at the locus 'E13' in the population 'PLJC!
There is 100% missing data at the locus 'E13' in the population 'QYXF!
There is 100% missing data at the locus 'E13' in the population 'PLLT!
There is 100% missing data at the locus 'E13' in the population 'QYNX!
There is 14% missing data at the locus 'E15' in the population 'PLJN!
There is 13% missing data at the locus 'E15' in the population 'TSMJ!
There is 18% missing data at the locus 'E15' in the population 'PLJC!
There is 11% missing data at the locus 'E15' in the population 'QYXF!
There is 30% missing data at the locus 'E15' in the population 'PLLT!
There is 15% missing data at the locus 'E15' in the population 'QYNX!
There is 85% missing data at the locus 'E17' in the population 'PLJN!
There is 91% missing data at the locus 'E17' in the population 'TSMJ!
There is 87% missing data at the locus 'E17' in the population 'PLJC!
There is 88% missing data at the locus 'E17' in the population 'QYXF!
There is 92% missing data at the locus 'E17' in the population 'PLLT!
There is 92% missing data at the locus 'E17' in the population 'QYNX!
There is 100% missing data at the locus 'E19' in the population 'PLJN!
There is 91% missing data at the locus 'E19' in the population 'TSMJ!
There is 87% missing data at the locus 'E19' in the population 'PLJC!
There is 88% missing data at the locus 'E19' in the population 'QYXF!
There is 76% missing data at the locus 'E19' in the population 'PLLT!
There is 88% missing data at the locus 'E19' in the population 'QYNX!
There is 95% missing data at the locus 'E21' in the population 'PLJN!
There is 95% missing data at the locus 'E21' in the population 'TSMJ!
There is 93% missing data at the locus 'E21' in the population 'PLJC!
There is 88% missing data at the locus 'E21' in the population 'QYXF!
There is 92% missing data at the locus 'E21' in the population 'PLLT!
There is 84% missing data at the locus 'E21' in the population 'QYNX!
There is 95% missing data at the locus 'E23' in the population 'PLJN!
There is 95% missing data at the locus 'E23' in the population 'TSMJ!
There is 93% missing data at the locus 'E23' in the population 'PLJC!
There is 100% missing data at the locus 'E23' in the population 'QYXF!
There is 100% missing data at the locus 'E23' in the population 'PLLT!
There is 100% missing data at the locus 'E23' in the population 'QYNX!
There is 66% missing data at the locus 'E25' in the population 'PLJN!
There is 91% missing data at the locus 'E25' in the population 'TSMJ!
There is 93% missing data at the locus 'E25' in the population 'PLJC!
There is 88% missing data at the locus 'E25' in the population 'QYXF!
There is 84% missing data at the locus 'E25' in the population 'PLLT!
There is 92% missing data at the locus 'E25' in the population 'QYNX!
There is 90% missing data at the locus 'E27' in the population 'PLJN!
There is 82% missing data at the locus 'E27' in the population 'TSMJ!
There is 75% missing data at the locus 'E27' in the population 'PLJC!
There is 77% missing data at the locus 'E27' in the population 'QYXF!
There is 84% missing data at the locus 'E27' in the population 'PLLT!
There is 88% missing data at the locus 'E27' in the population 'QYNX!
There is 23% missing data at the locus 'E29' in the population 'PLJN!
There is 17% missing data at the locus 'E29' in the population 'TSMJ!
There is 12% missing data at the locus 'E29' in the population 'PLJC!
There is 22% missing data at the locus 'E29' in the population 'QYXF!
There is 23% missing data at the locus 'E29' in the population 'PLLT!
There is 11% missing data at the locus 'E29' in the population 'QYNX!
There is 100% missing data at the locus 'E31' in the population 'PLJN!
There is 100% missing data at the locus 'E31' in the population 'TSMJ!
There is 100% missing data at the locus 'E31' in the population 'PLJC!
There is 100% missing data at the locus 'E31' in the population 'QYXF!
There is 92% missing data at the locus 'E31' in the population 'PLLT!
There is 100% missing data at the locus 'E31' in the population 'QYNX!
There is 85% missing data at the locus 'E33' in the population 'PLJN!
There is 95% missing data at the locus 'E33' in the population 'TSMJ!
There is 93% missing data at the locus 'E33' in the population 'PLJC!
There is 88% missing data at the locus 'E33' in the population 'QYXF!
There is 92% missing data at the locus 'E33' in the population 'PLLT!
There is 100% missing data at the locus 'E33' in the population 'QYNX!
There is 23% missing data at the locus 'E35' in the population 'PLJN!
There is 18% missing data at the locus 'E35' in the population 'PLJC!
There is 22% missing data at the locus 'E35' in the population 'QYXF!
There is 23% missing data at the locus 'E35' in the population 'PLLT!
There is 11% missing data at the locus 'E35' in the population 'QYNX!
There is 95% missing data at the locus 'E37' in the population 'PLJN!
There is 95% missing data at the locus 'E37' in the population 'TSMJ!
There is 100% missing data at the locus 'E37' in the population 'PLJC!
There is 100% missing data at the locus 'E37' in the population 'QYXF!
There is 100% missing data at the locus 'E37' in the population 'PLLT!
There is 96% missing data at the locus 'E37' in the population 'QYNX!
There is 52% missing data at the locus 'E39' in the population 'PLJN!
There is 47% missing data at the locus 'E39' in the population 'TSMJ!
There is 56% missing data at the locus 'E39' in the population 'PLJC!
There is 44% missing data at the locus 'E39' in the population 'QYXF!
There is 30% missing data at the locus 'E39' in the population 'PLLT!
There is 23% missing data at the locus 'E39' in the population 'QYNX!
There is 90% missing data at the locus 'E41' in the population 'PLJN!
There is 82% missing data at the locus 'E41' in the population 'TSMJ!
There is 93% missing data at the locus 'E41' in the population 'PLJC!
There is 88% missing data at the locus 'E41' in the population 'QYXF!
There is 100% missing data at the locus 'E41' in the population 'PLLT!
There is 100% missing data at the locus 'E41' in the population 'QYNX!
There is 47% missing data at the locus 'E43' in the population 'PLJN!
There is 26% missing data at the locus 'E43' in the population 'TSMJ!
There is 18% missing data at the locus 'E43' in the population 'PLJC!
There is 22% missing data at the locus 'E43' in the population 'QYXF!
There is 15% missing data at the locus 'E43' in the population 'PLLT!
There is 19% missing data at the locus 'E43' in the population 'QYNX!
There is 85% missing data at the locus 'E45' in the population 'PLJN!
There is 95% missing data at the locus 'E45' in the population 'TSMJ!
There is 100% missing data at the locus 'E45' in the population 'PLJC!
There is 88% missing data at the locus 'E45' in the population 'QYXF!
There is 100% missing data at the locus 'E45' in the population 'PLLT!
There is 100% missing data at the locus 'E45' in the population 'QYNX!
There is 80% missing data at the locus 'E47' in the population 'PLJN!
There is 100% missing data at the locus 'E47' in the population 'TSMJ!
There is 93% missing data at the locus 'E47' in the population 'PLJC!
There is 100% missing data at the locus 'E47' in the population 'QYXF!
There is 100% missing data at the locus 'E47' in the population 'PLLT!
There is 100% missing data at the locus 'E47' in the population 'QYNX!
There is 100% missing data at the locus 'E49' in the population 'PLJN!
There is 91% missing data at the locus 'E49' in the population 'TSMJ!
There is 37% missing data at the locus 'E49' in the population 'PLJC!
There is 66% missing data at the locus 'E49' in the population 'QYXF!
There is 38% missing data at the locus 'E49' in the population 'PLLT!
There is 34% missing data at the locus 'E49' in the population 'QYNX!
There is 100% missing data at the locus 'E51' in the population 'PLJN!
There is 100% missing data at the locus 'E51' in the population 'TSMJ!
There is 93% missing data at the locus 'E51' in the population 'PLJC!
There is 100% missing data at the locus 'E51' in the population 'QYXF!
There is 92% missing data at the locus 'E51' in the population 'PLLT!
There is 96% missing data at the locus 'E51' in the population 'QYNX!
There is 95% missing data at the locus 'E53' in the population 'PLJN!
There is 86% missing data at the locus 'E53' in the population 'TSMJ!
There is 93% missing data at the locus 'E53' in the population 'PLJC!
There is 77% missing data at the locus 'E53' in the population 'QYXF!
There is 92% missing data at the locus 'E53' in the population 'PLLT!
There is 100% missing data at the locus 'E53' in the population 'QYNX!
There is 23% missing data at the locus 'E55' in the population 'PLJN!
There is 21% missing data at the locus 'E55' in the population 'TSMJ!
There is 25% missing data at the locus 'E55' in the population 'PLJC!
There is 33% missing data at the locus 'E55' in the population 'QYXF!
There is 38% missing data at the locus 'E55' in the population 'PLLT!
There is 34% missing data at the locus 'E55' in the population 'QYNX!
There is 23% missing data at the locus 'E57' in the population 'PLJN!
There is 17% missing data at the locus 'E57' in the population 'TSMJ!
There is 25% missing data at the locus 'E57' in the population 'PLJC!
There is 44% missing data at the locus 'E57' in the population 'QYXF!
There is 15% missing data at the locus 'E57' in the population 'PLLT!
There is 15% missing data at the locus 'E57' in the population 'QYNX!
There is 90% missing data at the locus 'E59' in the population 'PLJN!
There is 95% missing data at the locus 'E59' in the population 'TSMJ!
There is 87% missing data at the locus 'E59' in the population 'PLJC!
There is 88% missing data at the locus 'E59' in the population 'QYXF!
There is 92% missing data at the locus 'E59' in the population 'PLLT!
There is 92% missing data at the locus 'E59' in the population 'QYNX!
There is 57% missing data at the locus 'E61' in the population 'PLJN!
There is 73% missing data at the locus 'E61' in the population 'TSMJ!
There is 68% missing data at the locus 'E61' in the population 'PLJC!
There is 88% missing data at the locus 'E61' in the population 'QYXF!
There is 46% missing data at the locus 'E61' in the population 'PLLT!
There is 84% missing data at the locus 'E61' in the population 'QYNX!
There is 100% missing data at the locus 'E63' in the population 'PLJN!
There is 91% missing data at the locus 'E63' in the population 'TSMJ!
There is 100% missing data at the locus 'E63' in the population 'PLJC!
There is 100% missing data at the locus 'E63' in the population 'QYXF!
There is 100% missing data at the locus 'E63' in the population 'PLLT!
There is 100% missing data at the locus 'E63' in the population 'QYNX!
There is 95% missing data at the locus 'E65' in the population 'PLJN!
There is 60% missing data at the locus 'E65' in the population 'TSMJ!
There is 87% missing data at the locus 'E65' in the population 'PLJC!
There is 100% missing data at the locus 'E65' in the population 'QYXF!
There is 100% missing data at the locus 'E65' in the population 'PLLT!
There is 92% missing data at the locus 'E65' in the population 'QYNX!
There is 90% missing data at the locus 'E67' in the population 'PLJN!
There is 100% missing data at the locus 'E67' in the population 'TSMJ!
There is 100% missing data at the locus 'E67' in the population 'PLJC!
There is 100% missing data at the locus 'E67' in the population 'QYXF!
There is 100% missing data at the locus 'E67' in the population 'PLLT!
There is 100% missing data at the locus 'E67' in the population 'QYNX!
There is 42% missing data at the locus 'E69' in the population 'PLJN!
There is 39% missing data at the locus 'E69' in the population 'TSMJ!
There is 56% missing data at the locus 'E69' in the population 'PLJC!
There is 44% missing data at the locus 'E69' in the population 'QYXF!
There is 76% missing data at the locus 'E69' in the population 'PLLT!
There is 30% missing data at the locus 'E69' in the population 'QYNX!
There is 76% missing data at the locus 'E71' in the population 'PLJN!
There is 56% missing data at the locus 'E71' in the population 'TSMJ!
There is 87% missing data at the locus 'E71' in the population 'PLJC!
There is 100% missing data at the locus 'E71' in the population 'QYXF!
There is 100% missing data at the locus 'E71' in the population 'PLLT!
There is 96% missing data at the locus 'E71' in the population 'QYNX!
There is 100% missing data at the locus 'E73' in the population 'PLJN!
There is 91% missing data at the locus 'E73' in the population 'TSMJ!
There is 100% missing data at the locus 'E73' in the population 'PLJC!
There is 100% missing data at the locus 'E73' in the population 'QYXF!
There is 100% missing data at the locus 'E73' in the population 'PLLT!
There is 100% missing data at the locus 'E73' in the population 'QYNX!
There is 61% missing data at the locus 'E75' in the population 'PLJN!
There is 73% missing data at the locus 'E75' in the population 'TSMJ!
There is 56% missing data at the locus 'E75' in the population 'PLJC!
There is 44% missing data at the locus 'E75' in the population 'QYXF!
There is 53% missing data at the locus 'E75' in the population 'PLLT!
There is 46% missing data at the locus 'E75' in the population 'QYNX!
There is 80% missing data at the locus 'E77' in the population 'PLJN!
There is 95% missing data at the locus 'E77' in the population 'TSMJ!
There is 100% missing data at the locus 'E77' in the population 'PLJC!
There is 100% missing data at the locus 'E77' in the population 'QYXF!
There is 84% missing data at the locus 'E77' in the population 'PLLT!
There is 96% missing data at the locus 'E77' in the population 'QYNX!
There is 90% missing data at the locus 'E79' in the population 'PLJN!
There is 78% missing data at the locus 'E79' in the population 'TSMJ!
There is 93% missing data at the locus 'E79' in the population 'PLJC!
There is 100% missing data at the locus 'E79' in the population 'QYXF!
There is 76% missing data at the locus 'E79' in the population 'PLLT!
There is 80% missing data at the locus 'E79' in the population 'QYNX!
There is 42% missing data at the locus 'E81' in the population 'PLJN!
There is 43% missing data at the locus 'E81' in the population 'TSMJ!
There is 25% missing data at the locus 'E81' in the population 'PLJC!
There is 33% missing data at the locus 'E81' in the population 'QYXF!
There is 30% missing data at the locus 'E81' in the population 'PLLT!
There is 19% missing data at the locus 'E81' in the population 'QYNX!
There is 71% missing data at the locus 'E83' in the population 'PLJN!
There is 47% missing data at the locus 'E83' in the population 'TSMJ!
There is 25% missing data at the locus 'E83' in the population 'PLJC!
There is 22% missing data at the locus 'E83' in the population 'QYXF!
There is 23% missing data at the locus 'E83' in the population 'PLLT!
There is 23% missing data at the locus 'E83' in the population 'QYNX!
There is 95% missing data at the locus 'E85' in the population 'PLJN!
There is 82% missing data at the locus 'E85' in the population 'TSMJ!
There is 100% missing data at the locus 'E85' in the population 'PLJC!
There is 100% missing data at the locus 'E85' in the population 'QYXF!
There is 100% missing data at the locus 'E85' in the population 'PLLT!
There is 100% missing data at the locus 'E85' in the population 'QYNX!
There is 100% missing data at the locus 'E87' in the population 'PLJN!
There is 91% missing data at the locus 'E87' in the population 'TSMJ!
There is 100% missing data at the locus 'E87' in the population 'PLJC!
There is 100% missing data at the locus 'E87' in the population 'QYXF!
There is 100% missing data at the locus 'E87' in the population 'PLLT!
There is 96% missing data at the locus 'E87' in the population 'QYNX!
There is 85% missing data at the locus 'E89' in the population 'PLJN!
There is 100% missing data at the locus 'E89' in the population 'TSMJ!
There is 93% missing data at the locus 'E89' in the population 'PLJC!
There is 100% missing data at the locus 'E89' in the population 'QYXF!
There is 92% missing data at the locus 'E89' in the population 'PLLT!
There is 100% missing data at the locus 'E89' in the population 'QYNX!
There is 85% missing data at the locus 'E91' in the population 'PLJN!
There is 100% missing data at the locus 'E91' in the population 'TSMJ!
There is 100% missing data at the locus 'E91' in the population 'PLJC!
There is 100% missing data at the locus 'E91' in the population 'QYXF!
There is 100% missing data at the locus 'E91' in the population 'PLLT!
There is 100% missing data at the locus 'E91' in the population 'QYNX!
There is 47% missing data at the locus 'E93' in the population 'PLJN!
There is 52% missing data at the locus 'E93' in the population 'TSMJ!
There is 43% missing data at the locus 'E93' in the population 'PLJC!
There is 44% missing data at the locus 'E93' in the population 'QYXF!
There is 23% missing data at the locus 'E93' in the population 'PLLT!
There is 23% missing data at the locus 'E93' in the population 'QYNX!
There is 90% missing data at the locus 'E95' in the population 'PLJN!
There is 100% missing data at the locus 'E95' in the population 'TSMJ!
There is 93% missing data at the locus 'E95' in the population 'PLJC!
There is 88% missing data at the locus 'E95' in the population 'QYXF!
There is 92% missing data at the locus 'E95' in the population 'PLLT!
There is 88% missing data at the locus 'E95' in the population 'QYNX!
There is 38% missing data at the locus 'E97' in the population 'PLJN!
There is 26% missing data at the locus 'E97' in the population 'TSMJ!
There is 12% missing data at the locus 'E97' in the population 'PLJC!
There is 11% missing data at the locus 'E97' in the population 'QYXF!
There is 23% missing data at the locus 'E97' in the population 'PLLT!
There is 15% missing data at the locus 'E97' in the population 'QYNX!
There is 9% missing data at the locus 'E99' in the population 'PLJN!
There is 8% missing data at the locus 'E99' in the population 'TSMJ!
There is 12% missing data at the locus 'E99' in the population 'PLJC!
There is 22% missing data at the locus 'E99' in the population 'QYXF!
There is 15% missing data at the locus 'E99' in the population 'PLLT!
There is 11% missing data at the locus 'E99' in the population 'QYNX!
There is 100% missing data at the locus 'E101' in the population 'PLJN!
There is 91% missing data at the locus 'E101' in the population 'TSMJ!
There is 87% missing data at the locus 'E101' in the population 'PLJC!
There is 88% missing data at the locus 'E101' in the population 'QYXF!
There is 92% missing data at the locus 'E101' in the population 'PLLT!
There is 92% missing data at the locus 'E101' in the population 'QYNX!
There is 14% missing data at the locus 'E103' in the population 'PLJN!
There is 30% missing data at the locus 'E103' in the population 'TSMJ!
There is 18% missing data at the locus 'E103' in the population 'PLJC!
There is 33% missing data at the locus 'E103' in the population 'QYXF!
There is 15% missing data at the locus 'E103' in the population 'PLLT!
There is 15% missing data at the locus 'E103' in the population 'QYNX!
There is 14% missing data at the locus 'E105' in the population 'PLJN!
There is 17% missing data at the locus 'E105' in the population 'TSMJ!
There is 18% missing data at the locus 'E105' in the population 'PLJC!
There is 22% missing data at the locus 'E105' in the population 'QYXF!
There is 15% missing data at the locus 'E105' in the population 'PLLT!
There is 15% missing data at the locus 'E105' in the population 'QYNX!
There is 19% missing data at the locus 'E107' in the population 'PLJN!
There is 13% missing data at the locus 'E107' in the population 'TSMJ!
There is 18% missing data at the locus 'E107' in the population 'PLJC!
There is 33% missing data at the locus 'E107' in the population 'QYXF!
There is 15% missing data at the locus 'E107' in the population 'PLLT!
There is 15% missing data at the locus 'E107' in the population 'QYNX!
There is 90% missing data at the locus 'E109' in the population 'PLJN!
There is 82% missing data at the locus 'E109' in the population 'TSMJ!
There is 93% missing data at the locus 'E109' in the population 'PLJC!
There is 88% missing data at the locus 'E109' in the population 'QYXF!
There is 84% missing data at the locus 'E109' in the population 'PLLT!
There is 96% missing data at the locus 'E109' in the population 'QYNX!
There is 9% missing data at the locus 'E111' in the population 'PLJN!
There is 13% missing data at the locus 'E111' in the population 'TSMJ!
There is 12% missing data at the locus 'E111' in the population 'PLJC!
There is 22% missing data at the locus 'E111' in the population 'QYXF!
There is 15% missing data at the locus 'E111' in the population 'PLLT!
There is 7% missing data at the locus 'E111' in the population 'QYNX!
There is 95% missing data at the locus 'E113' in the population 'PLJN!
There is 95% missing data at the locus 'E113' in the population 'TSMJ!
There is 87% missing data at the locus 'E113' in the population 'PLJC!
There is 88% missing data at the locus 'E113' in the population 'QYXF!
There is 92% missing data at the locus 'E113' in the population 'PLLT!
There is 92% missing data at the locus 'E113' in the population 'QYNX!
There is 19% missing data at the locus 'E115' in the population 'PLJN!
There is 26% missing data at the locus 'E115' in the population 'TSMJ!
There is 6% missing data at the locus 'E115' in the population 'PLJC!
There is 11% missing data at the locus 'E115' in the population 'QYXF!
There is 15% missing data at the locus 'E115' in the population 'PLLT!
There is 14% missing data at the locus 'E117' in the population 'PLJN!
There is 13% missing data at the locus 'E117' in the population 'TSMJ!
There is 12% missing data at the locus 'E117' in the population 'PLJC!
There is 22% missing data at the locus 'E117' in the population 'QYXF!
There is 15% missing data at the locus 'E117' in the population 'PLLT!
There is 7% missing data at the locus 'E117' in the population 'QYNX!
There is 85% missing data at the locus 'E119' in the population 'PLJN!
There is 82% missing data at the locus 'E119' in the population 'TSMJ!
There is 93% missing data at the locus 'E119' in the population 'PLJC!
There is 100% missing data at the locus 'E119' in the population 'QYXF!
There is 100% missing data at the locus 'E119' in the population 'PLLT!
There is 100% missing data at the locus 'E119' in the population 'QYNX!
There is 9% missing data at the locus 'E121' in the population 'PLJN!
There is 8% missing data at the locus 'E121' in the population 'TSMJ!
There is 12% missing data at the locus 'E121' in the population 'PLJC!
There is 22% missing data at the locus 'E121' in the population 'QYXF!
There is 15% missing data at the locus 'E121' in the population 'PLLT!
There is 7% missing data at the locus 'E121' in the population 'QYNX!
There is 9% missing data at the locus 'E123' in the population 'PLJN!
There is 21% missing data at the locus 'E123' in the population 'TSMJ!
There is 18% missing data at the locus 'E123' in the population 'PLJC!
There is 22% missing data at the locus 'E123' in the population 'QYXF!
There is 23% missing data at the locus 'E123' in the population 'PLLT!
There is 15% missing data at the locus 'E123' in the population 'QYNX!
There is 9% missing data at the locus 'E125' in the population 'PLJN!
There is 13% missing data at the locus 'E125' in the population 'TSMJ!
There is 12% missing data at the locus 'E125' in the population 'PLJC!
There is 22% missing data at the locus 'E125' in the population 'QYXF!
There is 15% missing data at the locus 'E125' in the population 'PLLT!
There is 11% missing data at the locus 'E125' in the population 'QYNX!
There is 95% missing data at the locus 'E127' in the population 'PLJN!
There is 95% missing data at the locus 'E127' in the population 'TSMJ!
There is 87% missing data at the locus 'E127' in the population 'PLJC!
There is 88% missing data at the locus 'E127' in the population 'QYXF!
There is 92% missing data at the locus 'E127' in the population 'PLLT!
There is 92% missing data at the locus 'E127' in the population 'QYNX!
There is 19% missing data at the locus 'E129' in the population 'PLJN!
There is 21% missing data at the locus 'E129' in the population 'TSMJ!
There is 12% missing data at the locus 'E129' in the population 'PLJC!
There is 11% missing data at the locus 'E129' in the population 'QYXF!
There is 15% missing data at the locus 'E129' in the population 'PLLT!
There is 11% missing data at the locus 'E129' in the population 'QYNX!
There is 14% missing data at the locus 'E131' in the population 'PLJN!
There is 8% missing data at the locus 'E131' in the population 'TSMJ!
There is 12% missing data at the locus 'E131' in the population 'PLJC!
There is 22% missing data at the locus 'E131' in the population 'QYXF!
There is 15% missing data at the locus 'E131' in the population 'PLLT!
There is 7% missing data at the locus 'E131' in the population 'QYNX!
There is 85% missing data at the locus 'E133' in the population 'PLJN!
There is 82% missing data at the locus 'E133' in the population 'TSMJ!
There is 93% missing data at the locus 'E133' in the population 'PLJC!
There is 100% missing data at the locus 'E133' in the population 'QYXF!
There is 100% missing data at the locus 'E133' in the population 'PLLT!
There is 100% missing data at the locus 'E133' in the population 'QYNX!
There is 9% missing data at the locus 'E135' in the population 'PLJN!
There is 17% missing data at the locus 'E135' in the population 'TSMJ!
There is 12% missing data at the locus 'E135' in the population 'PLJC!
There is 22% missing data at the locus 'E135' in the population 'QYXF!
There is 23% missing data at the locus 'E135' in the population 'PLLT!
There is 11% missing data at the locus 'E135' in the population 'QYNX!
There is 9% missing data at the locus 'E137' in the population 'PLJN!
There is 21% missing data at the locus 'E137' in the population 'TSMJ!
There is 12% missing data at the locus 'E137' in the population 'PLJC!
There is 11% missing data at the locus 'E137' in the population 'QYXF!
There is 23% missing data at the locus 'E137' in the population 'PLLT!
There is 15% missing data at the locus 'E137' in the population 'QYNX!
There is 85% missing data at the locus 'E139' in the population 'PLJN!
There is 95% missing data at the locus 'E139' in the population 'TSMJ!
There is 100% missing data at the locus 'E139' in the population 'PLJC!
There is 100% missing data at the locus 'E139' in the population 'QYXF!
There is 100% missing data at the locus 'E139' in the population 'PLLT!
There is 100% missing data at the locus 'E139' in the population 'QYNX!
There is 100% missing data at the locus 'E141' in the population 'PLJN!
There is 82% missing data at the locus 'E141' in the population 'TSMJ!
There is 100% missing data at the locus 'E141' in the population 'PLJC!
There is 88% missing data at the locus 'E141' in the population 'QYXF!
There is 92% missing data at the locus 'E141' in the population 'PLLT!
There is 100% missing data at the locus 'E141' in the population 'QYNX!
There is 47% missing data at the locus 'E143' in the population 'PLJN!
There is 65% missing data at the locus 'E143' in the population 'TSMJ!
There is 68% missing data at the locus 'E143' in the population 'PLJC!
There is 44% missing data at the locus 'E143' in the population 'QYXF!
There is 53% missing data at the locus 'E143' in the population 'PLLT!
There is 61% missing data at the locus 'E143' in the population 'QYNX!
There is 33% missing data at the locus 'E145' in the population 'PLJN!
There is 100% missing data at the locus 'E145' in the population 'TSMJ!
There is 93% missing data at the locus 'E145' in the population 'PLJC!
There is 100% missing data at the locus 'E145' in the population 'QYXF!
There is 100% missing data at the locus 'E145' in the population 'PLLT!
There is 100% missing data at the locus 'E145' in the population 'QYNX!
There is 80% missing data at the locus 'E147' in the population 'PLJN!
There is 95% missing data at the locus 'E147' in the population 'TSMJ!
There is 93% missing data at the locus 'E147' in the population 'PLJC!
There is 77% missing data at the locus 'E147' in the population 'QYXF!
There is 92% missing data at the locus 'E147' in the population 'PLLT!
There is 96% missing data at the locus 'E147' in the population 'QYNX!
There is 90% missing data at the locus 'E149' in the population 'PLJN!
There is 91% missing data at the locus 'E149' in the population 'TSMJ!
There is 93% missing data at the locus 'E149' in the population 'PLJC!
There is 88% missing data at the locus 'E149' in the population 'QYXF!
There is 84% missing data at the locus 'E149' in the population 'PLLT!
There is 92% missing data at the locus 'E149' in the population 'QYNX!
There is 52% missing data at the locus 'E151' in the population 'PLJN!
There is 91% missing data at the locus 'E151' in the population 'TSMJ!
There is 87% missing data at the locus 'E151' in the population 'PLJC!
There is 88% missing data at the locus 'E151' in the population 'QYXF!
There is 84% missing data at the locus 'E151' in the population 'PLLT!
There is 88% missing data at the locus 'E151' in the population 'QYNX!
There is 95% missing data at the locus 'E153' in the population 'PLJN!
There is 91% missing data at the locus 'E153' in the population 'TSMJ!
There is 93% missing data at the locus 'E153' in the population 'PLJC!
There is 88% missing data at the locus 'E153' in the population 'QYXF!
There is 100% missing data at the locus 'E153' in the population 'PLLT!
There is 88% missing data at the locus 'E153' in the population 'QYNX!
There is 28% missing data at the locus 'E155' in the population 'PLJN!
There is 8% missing data at the locus 'E155' in the population 'TSMJ!
There is 6% missing data at the locus 'E155' in the population 'PLJC!
There is 11% missing data at the locus 'E155' in the population 'QYXF!
There is 7% missing data at the locus 'E155' in the population 'PLLT!
There is 80% missing data at the locus 'E157' in the population 'PLJN!
There is 78% missing data at the locus 'E157' in the population 'TSMJ!
There is 87% missing data at the locus 'E157' in the population 'PLJC!
There is 88% missing data at the locus 'E157' in the population 'QYXF!
There is 84% missing data at the locus 'E157' in the population 'PLLT!
There is 84% missing data at the locus 'E157' in the population 'QYNX!
There is 100% missing data at the locus 'E159' in the population 'PLJN!
There is 100% missing data at the locus 'E159' in the population 'TSMJ!
There is 100% missing data at the locus 'E159' in the population 'PLJC!
There is 100% missing data at the locus 'E159' in the population 'QYXF!
There is 100% missing data at the locus 'E159' in the population 'PLLT!
There is 92% missing data at the locus 'E159' in the population 'QYNX!
There is 90% missing data at the locus 'E161' in the population 'PLJN!
There is 100% missing data at the locus 'E161' in the population 'TSMJ!
There is 100% missing data at the locus 'E161' in the population 'PLJC!
There is 88% missing data at the locus 'E161' in the population 'QYXF!
There is 100% missing data at the locus 'E161' in the population 'PLLT!
There is 96% missing data at the locus 'E161' in the population 'QYNX!
There is 90% missing data at the locus 'E163' in the population 'PLJN!
There is 100% missing data at the locus 'E163' in the population 'TSMJ!
There is 100% missing data at the locus 'E163' in the population 'PLJC!
There is 100% missing data at the locus 'E163' in the population 'QYXF!
There is 100% missing data at the locus 'E163' in the population 'PLLT!
There is 100% missing data at the locus 'E163' in the population 'QYNX!
There is 100% missing data at the locus 'E165' in the population 'PLJN!
There is 34% missing data at the locus 'E165' in the population 'TSMJ!
There is 25% missing data at the locus 'E165' in the population 'PLJC!
There is 33% missing data at the locus 'E165' in the population 'QYXF!
There is 53% missing data at the locus 'E165' in the population 'PLLT!
There is 30% missing data at the locus 'E165' in the population 'QYNX!
There is 80% missing data at the locus 'E167' in the population 'PLJN!
There is 95% missing data at the locus 'E167' in the population 'TSMJ!
There is 93% missing data at the locus 'E167' in the population 'PLJC!
There is 55% missing data at the locus 'E167' in the population 'QYXF!
There is 100% missing data at the locus 'E167' in the population 'PLLT!
There is 96% missing data at the locus 'E167' in the population 'QYNX!
There is 38% missing data at the locus 'E169' in the population 'PLJN!
There is 100% missing data at the locus 'E169' in the population 'TSMJ!
There is 93% missing data at the locus 'E169' in the population 'PLJC!
There is 100% missing data at the locus 'E169' in the population 'QYXF!
There is 100% missing data at the locus 'E169' in the population 'PLLT!
There is 96% missing data at the locus 'E169' in the population 'QYNX!
There is 57% missing data at the locus 'E171' in the population 'PLJN!
There is 12% missing data at the locus 'E171' in the population 'PLJC!
There is 66% missing data at the locus 'E171' in the population 'QYXF!
There is 46% missing data at the locus 'E171' in the population 'PLLT!
There is 7% missing data at the locus 'E171' in the population 'QYNX!
There is 100% missing data at the locus 'E173' in the population 'PLJN!
There is 82% missing data at the locus 'E173' in the population 'TSMJ!
There is 87% missing data at the locus 'E173' in the population 'PLJC!
There is 66% missing data at the locus 'E173' in the population 'QYXF!
There is 84% missing data at the locus 'E173' in the population 'PLLT!
There is 84% missing data at the locus 'E173' in the population 'QYNX!
There is 95% missing data at the locus 'E175' in the population 'PLJN!
There is 73% missing data at the locus 'E175' in the population 'TSMJ!
There is 93% missing data at the locus 'E175' in the population 'PLJC!
There is 100% missing data at the locus 'E175' in the population 'QYXF!
There is 100% missing data at the locus 'E175' in the population 'PLLT!
There is 100% missing data at the locus 'E175' in the population 'QYNX!
There is 100% missing data at the locus 'E177' in the population 'PLJN!
There is 95% missing data at the locus 'E177' in the population 'TSMJ!
There is 31% missing data at the locus 'E177' in the population 'PLJC!
There is 33% missing data at the locus 'E177' in the population 'QYXF!
There is 30% missing data at the locus 'E177' in the population 'PLLT!
There is 38% missing data at the locus 'E177' in the population 'QYNX!
There is 61% missing data at the locus 'E179' in the population 'PLJN!
There is 34% missing data at the locus 'E179' in the population 'TSMJ!
There is 12% missing data at the locus 'E179' in the population 'PLJC!
There is 11% missing data at the locus 'E179' in the population 'QYXF!
There is 15% missing data at the locus 'E179' in the population 'PLLT!
There is 19% missing data at the locus 'E179' in the population 'QYNX!
There is 33% missing data at the locus 'E181' in the population 'PLJN!
There is 8% missing data at the locus 'E181' in the population 'TSMJ!
There is 12% missing data at the locus 'E181' in the population 'PLJC!
There is 22% missing data at the locus 'E181' in the population 'QYXF!
There is 15% missing data at the locus 'E181' in the population 'PLLT!
There is 11% missing data at the locus 'E181' in the population 'QYNX!
There is 52% missing data at the locus 'E183' in the population 'PLJN!
There is 91% missing data at the locus 'E183' in the population 'TSMJ!
There is 93% missing data at the locus 'E183' in the population 'PLJC!
There is 77% missing data at the locus 'E183' in the population 'QYXF!
There is 92% missing data at the locus 'E183' in the population 'PLLT!
There is 92% missing data at the locus 'E183' in the population 'QYNX!
There is 42% missing data at the locus 'E185' in the population 'PLJN!
There is 8% missing data at the locus 'E185' in the population 'TSMJ!
There is 15% missing data at the locus 'E185' in the population 'PLLT!
There is 7% missing data at the locus 'E185' in the population 'QYNX!
There is 42% missing data at the locus 'E187' in the population 'PLJN!
There is 19% missing data at the locus 'E189' in the population 'PLJN!
There is 25% missing data at the locus 'E189' in the population 'PLJC!
There is 44% missing data at the locus 'E189' in the population 'QYXF!
There is 61% missing data at the locus 'E189' in the population 'PLLT!
There is 26% missing data at the locus 'E189' in the population 'QYNX!
There is 42% missing data at the locus 'E191' in the population 'PLJN!
There is 80% missing data at the locus 'E193' in the population 'PLJN!
There is 100% missing data at the locus 'E193' in the population 'TSMJ!
There is 100% missing data at the locus 'E193' in the population 'PLJC!
There is 100% missing data at the locus 'E193' in the population 'QYXF!
There is 100% missing data at the locus 'E193' in the population 'PLLT!
There is 100% missing data at the locus 'E193' in the population 'QYNX!
There is 95% missing data at the locus 'E195' in the population 'PLJN!
There is 100% missing data at the locus 'E195' in the population 'TSMJ!
There is 100% missing data at the locus 'E195' in the population 'PLJC!
There is 100% missing data at the locus 'E195' in the population 'QYXF!
There is 100% missing data at the locus 'E195' in the population 'PLLT!
There is 100% missing data at the locus 'E195' in the population 'QYNX!
There is 19% missing data at the locus 'E197' in the population 'PLJN!
There is 23% missing data at the locus 'E199' in the population 'PLJN!
There is 19% missing data at the locus 'E201' in the population 'PLJN!
There is 80% missing data at the locus 'E203' in the population 'PLJN!
There is 100% missing data at the locus 'E203' in the population 'TSMJ!
There is 100% missing data at the locus 'E203' in the population 'PLJC!
There is 100% missing data at the locus 'E203' in the population 'QYXF!
There is 100% missing data at the locus 'E203' in the population 'PLLT!
There is 100% missing data at the locus 'E203' in the population 'QYNX!
There is 80% missing data at the locus 'E205' in the population 'PLJN!
There is 100% missing data at the locus 'E205' in the population 'TSMJ!
There is 100% missing data at the locus 'E205' in the population 'PLJC!
There is 100% missing data at the locus 'E205' in the population 'QYXF!
There is 100% missing data at the locus 'E205' in the population 'PLLT!
There is 100% missing data at the locus 'E205' in the population 'QYNX!
There is 23% missing data at the locus 'E207' in the population 'PLJN!
There is 50% missing data at the locus 'E207' in the population 'PLJC!
There is 33% missing data at the locus 'E207' in the population 'QYXF!
There is 23% missing data at the locus 'E207' in the population 'PLLT!
There is 15% missing data at the locus 'E207' in the population 'QYNX!
There is 19% missing data at the locus 'E209' in the population 'PLJN!
There is 95% missing data at the locus 'E211' in the population 'PLJN!
There is 95% missing data at the locus 'E211' in the population 'TSMJ!
There is 81% missing data at the locus 'E211' in the population 'PLJC!
There is 33% missing data at the locus 'E211' in the population 'QYXF!
There is 92% missing data at the locus 'E211' in the population 'PLLT!
There is 96% missing data at the locus 'E211' in the population 'QYNX!
There is 28% missing data at the locus 'E213' in the population 'PLJN!
There is 26% missing data at the locus 'E213' in the population 'TSMJ!
There is 25% missing data at the locus 'E213' in the population 'PLJC!
There is 22% missing data at the locus 'E213' in the population 'QYXF!
There is 23% missing data at the locus 'E213' in the population 'PLLT!
There is 26% missing data at the locus 'E213' in the population 'QYNX!
There is 19% missing data at the locus 'E215' in the population 'PLJN!
There is 17% missing data at the locus 'E215' in the population 'TSMJ!
There is 25% missing data at the locus 'E215' in the population 'PLJC!
There is 22% missing data at the locus 'E215' in the population 'QYXF!
There is 15% missing data at the locus 'E215' in the population 'PLLT!
There is 15% missing data at the locus 'E215' in the population 'QYNX!
There is 19% missing data at the locus 'E217' in the population 'PLJN!
There is 17% missing data at the locus 'E217' in the population 'TSMJ!
There is 12% missing data at the locus 'E217' in the population 'PLJC!
There is 22% missing data at the locus 'E217' in the population 'QYXF!
There is 15% missing data at the locus 'E217' in the population 'PLLT!
There is 15% missing data at the locus 'E217' in the population 'QYNX!
There is 19% missing data at the locus 'E219' in the population 'PLJN!
There is 17% missing data at the locus 'E219' in the population 'TSMJ!
There is 25% missing data at the locus 'E219' in the population 'PLJC!
There is 44% missing data at the locus 'E219' in the population 'QYXF!
There is 15% missing data at the locus 'E219' in the population 'PLLT!
There is 11% missing data at the locus 'E219' in the population 'QYNX!
There is 85% missing data at the locus 'E221' in the population 'PLJN!
There is 100% missing data at the locus 'E221' in the population 'TSMJ!
There is 100% missing data at the locus 'E221' in the population 'PLJC!
There is 100% missing data at the locus 'E221' in the population 'QYXF!
There is 100% missing data at the locus 'E221' in the population 'PLLT!
There is 100% missing data at the locus 'E221' in the population 'QYNX!
There is 85% missing data at the locus 'E223' in the population 'PLJN!
There is 100% missing data at the locus 'E223' in the population 'TSMJ!
There is 100% missing data at the locus 'E223' in the population 'PLJC!
There is 100% missing data at the locus 'E223' in the population 'QYXF!
There is 100% missing data at the locus 'E223' in the population 'PLLT!
There is 100% missing data at the locus 'E223' in the population 'QYNX!
There is 52% missing data at the locus 'E225' in the population 'PLJN!
There is 100% missing data at the locus 'E225' in the population 'TSMJ!
There is 100% missing data at the locus 'E225' in the population 'PLJC!
There is 100% missing data at the locus 'E225' in the population 'QYXF!
There is 100% missing data at the locus 'E225' in the population 'PLLT!
There is 100% missing data at the locus 'E225' in the population 'QYNX!
There is 66% missing data at the locus 'E227' in the population 'PLJN!
There is 100% missing data at the locus 'E227' in the population 'TSMJ!
There is 100% missing data at the locus 'E227' in the population 'PLJC!
There is 100% missing data at the locus 'E227' in the population 'QYXF!
There is 100% missing data at the locus 'E227' in the population 'PLLT!
There is 100% missing data at the locus 'E227' in the population 'QYNX!
There is 52% missing data at the locus 'E229' in the population 'PLJN!
There is 23% missing data at the locus 'E229' in the population 'PLLT!
There is 30% missing data at the locus 'E229' in the population 'QYNX!
There is 100% missing data at the locus 'E231' in the population 'PLJN!
There is 100% missing data at the locus 'E231' in the population 'TSMJ!
There is 100% missing data at the locus 'E231' in the population 'PLJC!
There is 77% missing data at the locus 'E231' in the population 'QYXF!
There is 100% missing data at the locus 'E231' in the population 'PLLT!
There is 88% missing data at the locus 'E231' in the population 'QYNX!
There is 100% missing data at the locus 'E233' in the population 'PLJN!
There is 100% missing data at the locus 'E233' in the population 'TSMJ!
There is 100% missing data at the locus 'E233' in the population 'PLJC!
There is 100% missing data at the locus 'E233' in the population 'QYXF!
There is 100% missing data at the locus 'E233' in the population 'PLLT!
There is 96% missing data at the locus 'E233' in the population 'QYNX!
There is 95% missing data at the locus 'E235' in the population 'PLJN!
There is 86% missing data at the locus 'E235' in the population 'TSMJ!
There is 87% missing data at the locus 'E235' in the population 'PLJC!
There is 88% missing data at the locus 'E235' in the population 'QYXF!
There is 92% missing data at the locus 'E235' in the population 'PLLT!
There is 80% missing data at the locus 'E235' in the population 'QYNX!
There is 90% missing data at the locus 'E237' in the population 'PLJN!
There is 100% missing data at the locus 'E237' in the population 'TSMJ!
There is 100% missing data at the locus 'E237' in the population 'PLJC!
There is 100% missing data at the locus 'E237' in the population 'QYXF!
There is 100% missing data at the locus 'E237' in the population 'PLLT!
There is 100% missing data at the locus 'E237' in the population 'QYNX!
There is 100% missing data at the locus 'E239' in the population 'PLJN!
There is 100% missing data at the locus 'E239' in the population 'TSMJ!
There is 100% missing data at the locus 'E239' in the population 'PLJC!
There is 100% missing data at the locus 'E239' in the population 'QYXF!
There is 100% missing data at the locus 'E239' in the population 'PLLT!
There is 100% missing data at the locus 'E239' in the population 'QYNX!
There is 100% missing data at the locus 'E241' in the population 'PLJN!
There is 100% missing data at the locus 'E241' in the population 'TSMJ!
There is 75% missing data at the locus 'E241' in the population 'PLJC!
There is 66% missing data at the locus 'E241' in the population 'QYXF!
There is 76% missing data at the locus 'E241' in the population 'PLLT!
There is 88% missing data at the locus 'E241' in the population 'QYNX!
There is 100% missing data at the locus 'E243' in the population 'PLJN!
There is 100% missing data at the locus 'E243' in the population 'TSMJ!
There is 100% missing data at the locus 'E243' in the population 'PLJC!
There is 100% missing data at the locus 'E243' in the population 'QYXF!
There is 100% missing data at the locus 'E243' in the population 'PLLT!
There is 100% missing data at the locus 'E243' in the population 'QYNX!
There is 85% missing data at the locus 'E245' in the population 'PLJN!
There is 100% missing data at the locus 'E245' in the population 'TSMJ!
There is 100% missing data at the locus 'E245' in the population 'PLJC!
There is 100% missing data at the locus 'E245' in the population 'QYXF!
There is 100% missing data at the locus 'E245' in the population 'PLLT!
There is 100% missing data at the locus 'E245' in the population 'QYNX!
There is 100% missing data at the locus 'E247' in the population 'PLJN!
There is 100% missing data at the locus 'E247' in the population 'TSMJ!
There is 87% missing data at the locus 'E247' in the population 'PLJC!
There is 77% missing data at the locus 'E247' in the population 'QYXF!
There is 92% missing data at the locus 'E247' in the population 'PLLT!
There is 92% missing data at the locus 'E247' in the population 'QYNX!
There is 100% missing data at the locus 'E249' in the population 'PLJN!
There is 100% missing data at the locus 'E249' in the population 'TSMJ!
There is 87% missing data at the locus 'E249' in the population 'PLJC!
There is 77% missing data at the locus 'E249' in the population 'QYXF!
There is 84% missing data at the locus 'E249' in the population 'PLLT!
There is 88% missing data at the locus 'E249' in the population 'QYNX!
There is 19% missing data at the locus 'E251' in the population 'PLJN!
There is 8% missing data at the locus 'E251' in the population 'TSMJ!
There is 12% missing data at the locus 'E251' in the population 'PLJC!
There is 22% missing data at the locus 'E251' in the population 'QYXF!
There is 15% missing data at the locus 'E251' in the population 'PLLT!
There is 7% missing data at the locus 'E251' in the population 'QYNX!
There is 90% missing data at the locus 'E253' in the population 'PLJN!
There is 95% missing data at the locus 'E253' in the population 'TSMJ!
There is 93% missing data at the locus 'E253' in the population 'PLJC!
There is 100% missing data at the locus 'E253' in the population 'QYXF!
There is 76% missing data at the locus 'E253' in the population 'PLLT!
There is 96% missing data at the locus 'E253' in the population 'QYNX!
There is 85% missing data at the locus 'E255' in the population 'PLJN!
There is 82% missing data at the locus 'E255' in the population 'TSMJ!
There is 87% missing data at the locus 'E255' in the population 'PLJC!
There is 88% missing data at the locus 'E255' in the population 'QYXF!
There is 76% missing data at the locus 'E255' in the population 'PLLT!
There is 88% missing data at the locus 'E255' in the population 'QYNX!
There is 19% missing data at the locus 'E257' in the population 'PLJN!
There is 21% missing data at the locus 'E257' in the population 'TSMJ!
There is 25% missing data at the locus 'E257' in the population 'PLJC!
There is 33% missing data at the locus 'E257' in the population 'QYXF!
There is 15% missing data at the locus 'E257' in the population 'PLLT!
There is 23% missing data at the locus 'E257' in the population 'QYNX!
There is 19% missing data at the locus 'E259' in the population 'PLJN!
There is 13% missing data at the locus 'E259' in the population 'TSMJ!
There is 12% missing data at the locus 'E259' in the population 'PLJC!
There is 22% missing data at the locus 'E259' in the population 'QYXF!
There is 15% missing data at the locus 'E259' in the population 'PLLT!
There is 7% missing data at the locus 'E259' in the population 'QYNX!
There is 95% missing data at the locus 'E261' in the population 'PLJN!
There is 86% missing data at the locus 'E261' in the population 'TSMJ!
There is 81% missing data at the locus 'E261' in the population 'PLJC!
There is 77% missing data at the locus 'E261' in the population 'QYXF!
There is 92% missing data at the locus 'E261' in the population 'PLLT!
There is 92% missing data at the locus 'E261' in the population 'QYNX!
There is 100% missing data at the locus 'E263' in the population 'PLJN!
There is 91% missing data at the locus 'E263' in the population 'TSMJ!
There is 87% missing data at the locus 'E263' in the population 'PLJC!
There is 88% missing data at the locus 'E263' in the population 'QYXF!
There is 84% missing data at the locus 'E263' in the population 'PLLT!
There is 96% missing data at the locus 'E263' in the population 'QYNX!
There is 90% missing data at the locus 'E265' in the population 'PLJN!
There is 91% missing data at the locus 'E265' in the population 'TSMJ!
There is 93% missing data at the locus 'E265' in the population 'PLJC!
There is 88% missing data at the locus 'E265' in the population 'QYXF!
There is 92% missing data at the locus 'E265' in the population 'PLLT!
There is 88% missing data at the locus 'E265' in the population 'QYNX!
There is 23% missing data at the locus 'E267' in the population 'PLJN!
There is 21% missing data at the locus 'E267' in the population 'TSMJ!
There is 25% missing data at the locus 'E267' in the population 'PLJC!
There is 22% missing data at the locus 'E267' in the population 'QYXF!
There is 15% missing data at the locus 'E267' in the population 'PLLT!
There is 11% missing data at the locus 'E267' in the population 'QYNX!
There is 19% missing data at the locus 'E269' in the population 'PLJN!
There is 100% missing data at the locus 'E271' in the population 'PLJN!
There is 100% missing data at the locus 'E271' in the population 'TSMJ!
There is 100% missing data at the locus 'E271' in the population 'PLJC!
There is 100% missing data at the locus 'E271' in the population 'QYXF!
There is 100% missing data at the locus 'E271' in the population 'PLLT!
There is 100% missing data at the locus 'E271' in the population 'QYNX!
There is 100% missing data at the locus 'E273' in the population 'PLJN!
There is 100% missing data at the locus 'E273' in the population 'TSMJ!
There is 100% missing data at the locus 'E273' in the population 'PLJC!
There is 100% missing data at the locus 'E273' in the population 'QYXF!
There is 100% missing data at the locus 'E273' in the population 'PLLT!
There is 100% missing data at the locus 'E273' in the population 'QYNX!
There is 19% missing data at the locus 'E275' in the population 'PLJN!
There is 13% missing data at the locus 'E275' in the population 'TSMJ!
There is 25% missing data at the locus 'E275' in the population 'PLJC!
There is 11% missing data at the locus 'E275' in the population 'QYXF!
There is 15% missing data at the locus 'E275' in the population 'PLLT!
There is 15% missing data at the locus 'E275' in the population 'QYNX!
There is 90% missing data at the locus 'E277' in the population 'PLJN!
There is 86% missing data at the locus 'E277' in the population 'TSMJ!
There is 87% missing data at the locus 'E277' in the population 'PLJC!
There is 88% missing data at the locus 'E277' in the population 'QYXF!
There is 84% missing data at the locus 'E277' in the population 'PLLT!
There is 92% missing data at the locus 'E277' in the population 'QYNX!
There is 90% missing data at the locus 'E279' in the population 'PLJN!
There is 86% missing data at the locus 'E279' in the population 'TSMJ!
There is 93% missing data at the locus 'E279' in the population 'PLJC!
There is 88% missing data at the locus 'E279' in the population 'QYXF!
There is 84% missing data at the locus 'E279' in the population 'PLLT!
There is 92% missing data at the locus 'E279' in the population 'QYNX!
There is 19% missing data at the locus 'E281' in the population 'PLJN!
There is 13% missing data at the locus 'E281' in the population 'TSMJ!
There is 12% missing data at the locus 'E281' in the population 'PLJC!
There is 11% missing data at the locus 'E281' in the population 'QYXF!
There is 15% missing data at the locus 'E281' in the population 'PLLT!
There is 7% missing data at the locus 'E281' in the population 'QYNX!
There is 19% missing data at the locus 'E283' in the population 'PLJN!
There is 8% missing data at the locus 'E283' in the population 'TSMJ!
There is 12% missing data at the locus 'E283' in the population 'PLJC!
There is 22% missing data at the locus 'E283' in the population 'QYXF!
There is 15% missing data at the locus 'E283' in the population 'PLLT!
There is 7% missing data at the locus 'E283' in the population 'QYNX!
There is 80% missing data at the locus 'E285' in the population 'PLJN!
There is 100% missing data at the locus 'E285' in the population 'TSMJ!
There is 100% missing data at the locus 'E285' in the population 'PLJC!
There is 100% missing data at the locus 'E285' in the population 'QYXF!
There is 100% missing data at the locus 'E285' in the population 'PLLT!
There is 100% missing data at the locus 'E285' in the population 'QYNX!
There is 90% missing data at the locus 'E287' in the population 'PLJN!
There is 82% missing data at the locus 'E287' in the population 'TSMJ!
There is 87% missing data at the locus 'E287' in the population 'PLJC!
There is 77% missing data at the locus 'E287' in the population 'QYXF!
There is 84% missing data at the locus 'E287' in the population 'PLLT!
There is 80% missing data at the locus 'E287' in the population 'QYNX!
There is 9% missing data at the locus 'E289' in the population 'PLJN!
There is 22% missing data at the locus 'E289' in the population 'QYXF!
There is 15% missing data at the locus 'E289' in the population 'PLLT!
There is 100% missing data at the locus 'E291' in the population 'PLJN!
There is 100% missing data at the locus 'E291' in the population 'TSMJ!
There is 100% missing data at the locus 'E291' in the population 'PLJC!
There is 100% missing data at the locus 'E291' in the population 'QYXF!
There is 100% missing data at the locus 'E291' in the population 'PLLT!
There is 100% missing data at the locus 'E291' in the population 'QYNX!
There is 90% missing data at the locus 'E293' in the population 'PLJN!
There is 100% missing data at the locus 'E293' in the population 'TSMJ!
There is 100% missing data at the locus 'E293' in the population 'PLJC!
There is 100% missing data at the locus 'E293' in the population 'QYXF!
There is 100% missing data at the locus 'E293' in the population 'PLLT!
There is 100% missing data at the locus 'E293' in the population 'QYNX!
There is 100% missing data at the locus 'E295' in the population 'PLJN!
There is 100% missing data at the locus 'E295' in the population 'TSMJ!
There is 75% missing data at the locus 'E295' in the population 'PLJC!
There is 66% missing data at the locus 'E295' in the population 'QYXF!
There is 92% missing data at the locus 'E295' in the population 'PLLT!
There is 88% missing data at the locus 'E295' in the population 'QYNX!
There is 100% missing data at the locus 'E297' in the population 'PLJN!
There is 100% missing data at the locus 'E297' in the population 'TSMJ!
There is 100% missing data at the locus 'E297' in the population 'PLJC!
There is 100% missing data at the locus 'E297' in the population 'QYXF!
There is 100% missing data at the locus 'E297' in the population 'PLLT!
There is 100% missing data at the locus 'E297' in the population 'QYNX!
There is 100% missing data at the locus 'E299' in the population 'PLJN!
There is 100% missing data at the locus 'E299' in the population 'TSMJ!
There is 87% missing data at the locus 'E299' in the population 'PLJC!
There is 77% missing data at the locus 'E299' in the population 'QYXF!
There is 92% missing data at the locus 'E299' in the population 'PLLT!
There is 88% missing data at the locus 'E299' in the population 'QYNX!
There is 100% missing data at the locus 'E301' in the population 'PLJN!
There is 100% missing data at the locus 'E301' in the population 'TSMJ!
There is 93% missing data at the locus 'E301' in the population 'PLJC!
There is 66% missing data at the locus 'E301' in the population 'QYXF!
There is 76% missing data at the locus 'E301' in the population 'PLLT!
There is 88% missing data at the locus 'E301' in the population 'QYNX!

## Sheet: Sheet1
PLJN-1	PLJN	0	1	1	0	0	0	1	0	0	0	0	0	0	0	1	1	0	1	0	0	1	0	0	0	1	0	1	0	1	1	0	0	0	0	1	1	0	1	1	1	0	1	1	1	0	0	0	0
PLJN-2	PLJN	1	0	0	0	0	1	1	0	0	0	0	0	0	0	1	1	0	1	1	0	1	0	1	0	1	0	1	0	1	1	0	0	1	0	1	1	0	0	1	1	1	0	0	0	0	1	0	0
PLJN-3	PLJN	0	1	1	1	0	0	1	0	0	0	0	1	0	0	1	1	0	1	0	1	1	0	0	0	1	0	1	0	1	1	0	0	1	1	1	1	0	0	1	1	0	1	1	1	0	0	0	1
PLJN-4	PLJN	0	1	1	0	0	0	1	0	1	0	0	0	1	0	1	1	0	1	0	1	0	0	0	0	1	1	0	1	0	0	0	0	0	0	0	1	0	0	0	0	0	0	1	0	1	1	1	1
PLJN-5	PLJN	0	1	1	0	0	0	1	0	0	0	0	0	0	0	1	1	0	1	0	1	1	0	0	0	1	0	1	0	1	1	1	0	1	0	1	1	0	0	1	1	0	1	1	1	0	0	0	0
PLJN-6	PLJN	1	0	1	0	0	0	0	1	0	0	0	0	0	1	1	1	0	0	0	1	1	0	0	0	1	0	0	1	0	1	0	0	0	1	1	1	0	0	1	0	1	1	0	1	0	0	1	0
PLJN-7	PLJN	0	1	0	0	0	0	1	0	0	1	0	0	0	0	1	1	1	1	0	1	1	0	1	0	1	1	1	0	1	0	0	0	1	0	1	0	0	0	0	1	0	1	1	0	0	0	0	0
PLJN-8	PLJN	0	1	1	0	0	0	0	0	0	0	0	0	0	0	0	1	0	0	0	1	1	0	0	0	1	1	1	0	1	1	0	1	0	0	1	1	0	1	1	1	0	1	1	0	1	1	1	1
PLJN-9	PLJN	0	1	1	0	1	0	1	0	0	0	0	0	0	1	1	1	0	1	0	1	1	0	1	0	1	0	0	0	0	0	0	0	1	0	0	1	1	0	0	1	0	0	1	1	0	0	0	0
PLJN-10	PLJN	0	1	1	0	0	0	1	0	0	0	1	0	0	0	1	0	0	1	0	0	0	0	0	0	0	0	1	0	1	1	1	0	0	0	1	0	0	0	1	0	0	0	0	1	0	0	0	0
PLJN-11	PLJN	0	1	1	0	0	0	1	0	0	0	0	0	0	0	1	1	1	1	1	0	1	0	0	1	1	0	1	0	1	1	0	0	1	0	1	1	0	0	1	1	0	1	1	0	0	0	1	0
PLJN-12	PLJN	1	0	1	0	1	0	1	0	0	0	0	1	0	0	1	1	0	1	0	0	1	0	1	0	1	1	0	0	1	1	0	1	0	0	1	1	0	0	1	1	0	1	1	1	0	0	1	1
PLJN-13	PLJN	0	1	1	1	0	0	1	0	0	0	0	0	0	0	1	1	0	0	0	1	1	0	0	1	0	0	1	1	1	1	1	0	1	0	1	1	0	0	1	0	1	1	1	1	0	0	0	0
PLJN-14	PLJN	0	1	1	0	0	0	1	0	0	0	0	0	1	0	1	1	1	1	0	1	1	0	1	0	1	1	1	0	1	1	0	0	1	1	1	1	1	0	0	1	0	0	1	1	0	0	1	0
PLJN-15	PLJN	0	1	1	0	0	0	1	0	0	0	0	0	0	0	1	1	0	0	0	1	1	1	0	1	1	0	1	0	1	1	0	0	0	0	1	1	0	0	1	0	0	1	0	0	1	1	0	1
PLJN-16	PLJN	1	1	1	0	0	0	1	1	0	0	0	0	0	1	1	1	0	0	0	1	1	0	0	0	1	1	1	0	1	1	0	0	1	0	0	0	0	0	0	1	0	0	1	1	0	0	0	0
PLJN-17	PLJN	0	1	0	0	0	0	1	0	0	1	0	0	0	0	1	1	0	1	0	1	1	0	0	1	0	0	0	0	1	1	0	0	0	0	1	1	0	0	1	0	0	1	0	1	0	0	0	0
PLJN-18	PLJN	0	1	1	0	0	0	1	0	1	0	0	0	0	0	0	1	0	1	0	1	1	0	0	0	1	0	1	1	0	1	1	0	1	1	1	1	0	0	1	1	0	1	1	1	0	0	1	0
PLJN-19	PLJN	0	0	0	0	1	0	1	0	0	0	0	0	0	0	1	1	0	1	0	1	1	0	1	1	1	1	1	0	1	1	0	0	1	0	1	1	1	1	1	1	0	1	1	0	0	0	1	1
PLJN-20	PLJN	0	1	1	0	0	1	1	0	0	0	0	0	0	0	1	1	0	0	0	0	0	0	1	0	1	0	1	0	1	1	0	0	1	0	1	1	0	0	1	0	0	1	1	1	1	0	0	0
PLJN-21	PLJN	0	0	1	0	1	0	1	0	0	0	0	0	0	0	1	1	0	1	0	1	1	0	0	0	1	0	1	0	1	1	0	0	0	0	1	1	0	0	1	1	0	1	1	1	0	0	0	0
TSMJ-1	TSMJ	0	1	1	0	0	0	1	0	0	0	0	1	1	0	1	1	0	1	0	1	1	0	0	0	1	0	1	0	1	1	0	0	0	0	1	1	0	0	1	1	0	1	1	1	0	0	0	0
TSMJ-2	TSMJ	1	1	1	0	0	0	1	0	0	0	0	0	0	0	1	1	0	1	0	1	1	0	0	0	1	0	0	0	1	1	0	0	0	0	1	1	0	1	0	1	0	1	1	0	0	1	0	0
TSMJ-3	TSMJ	0	0	0	0	0	0	1	0	0	0	0	0	0	0	1	1	0	1	0	0	1	0	0	0	1	0	1	0	1	1	0	0	0	0	1	1	1	0	1	0	1	1	1	1	0	0	0	0
TSMJ-4	TSMJ	1	1	1	1	0	0	1	0	0	0	0	0	0	0	1	1	0	1	1	1	0	0	0	0	1	0	1	0	1	1	0	0	0	0	1	1	0	0	1	1	0	1	1	0	1	0	0	0
TSMJ-5	TSMJ	0	1	1	0	0	0	0	0	0	0	0	1	0	0	1	1	0	1	0	1	1	0	0	0	1	1	1	1	1	1	0	1	0	0	1	1	0	1	0	1	0	1	1	1	0	1	0	0
TSMJ-6	TSMJ	0	0	1	0	0	0	0	0	0	1	0	0	0	1	1	1	1	1	0	1	1	0	0	1	1	0	1	0	0	1	0	0	0	0	1	1	0	0	1	0	1	1	1	0	0	0	0	0
TSMJ-7	TSMJ	1	1	0	0	0	0	1	1	0	0	0	0	0	0	1	1	0	1	0	1	0	0	1	0	1	0	1	1	1	1	0	0	1	1	1	1	0	0	1	1	0	1	1	1	0	0	0	0
TSMJ-8	TSMJ	0	1	1	0	0	0	1	0	1	0	0	0	0	0	1	1	0	1	0	1	1	0	0	0	1	0	0	0	1	0	0	0	0	0	1	1	0	0	0	1	0	1	1	1	1	1	0	0
TSMJ-9	TSMJ	0	1	1	0	0	0	1	1	0	1	0	1	1	0	1	1	0	1	0	1	1	0	0	0	0	0	1	0	1	1	1	0	0	0	1	1	0	0	1	0	1	0	1	1	0	0	0	0
TSMJ-10	TSMJ	1	1	1	1	0	0	1	0	0	0	0	0	0	0	0	0	0	1	1	0	1	0	0	0	1	0	1	0	0	1	0	0	0	0	1	0	0	0	1	1	0	1	1	1	0	0	0	0
TSMJ-11	TSMJ	0	1	1	0	0	0	0	0	0	0	0	1	0	0	1	1	0	1	0	1	1	0	0	0	1	0	1	0	1	1	1	0	1	0	1	1	0	0	1	1	0	1	1	1	0	1	0	0
TSMJ-12	TSMJ	1	1	1	0	0	0	1	0	0	0	0	0	0	0	1	1	0	1	0	1	1	1	0	0	1	0	1	0	1	1	1	0	0	1	1	1	0	0	1	1	0	1	1	1	0	0	0	0
TSMJ-13	TSMJ	0	0	1	1	0	0	1	0	0	0	0	0	0	0	1	1	0	1	0	1	1	0	0	0	0	0	1	0	0	1	0	0	0	0	1	1	1	1	0	1	0	1	1	1	0	1	1	0
TSMJ-14	TSMJ	1	1	1	0	0	0	1	0	0	0	0	0	0	0	1	1	0	1	0	1	1	0	0	0	1	1	0	0	1	1	0	1	0	0	1	1	0	1	0	1	0	1	1	0	0	0	0	0
TSMJ-15	TSMJ	0	1	1	0	0	0	1	0	0	0	1	1	0	0	1	1	1	1	0	1	0	0	1	1	0	0	1	1	1	1	0	0	0	1	1	1	0	0	1	1	0	1	1	1	0	1	0	0
TSMJ-16	TSMJ	0	0	1	0	0	0	1	0	0	1	0	0	0	1	1	1	0	1	0	1	1	0	0	0	1	0	1	0	1	1	1	0	0	0	1	1	0	0	1	0	1	1	1	1	0	1	0	0
TSMJ-17	TSMJ	1	1	1	0	0	0	1	1	0	0	0	0	1	1	0	1	0	0	0	1	1	0	0	0	1	0	1	1	1	1	0	0	0	0	1	1	0	0	1	1	0	1	1	1	0	0	0	0
TSMJ-18	TSMJ	0	1	0	0	0	0	0	0	1	0	0	0	0	0	1	1	0	1	0	1	1	0	0	0	0	0	1	0	1	1	1	0	0	0	1	1	0	0	1	1	0	1	1	0	0	1	0	1
TSMJ-19	TSMJ	0	1	1	0	0	0	1	1	0	0	0	1	0	0	1	1	0	1	1	1	1	0	0	0	1	0	1	0	1	1	0	0	0	0	1	1	0	1	0	1	0	1	1	1	0	0	0	0
TSMJ-20	TSMJ	1	1	1	1	0	0	1	0	0	0	0	0	0	0	1	1	0	1	0	1	1	0	0	0	1	0	0	0	1	1	0	0	1	0	1	1	0	0	1	0	1	1	1	1	0	1	0	0
TSMJ-21	TSMJ	0	1	1	0	0	0	1	0	0	0	0	1	0	0	1	0	0	1	0	1	1	0	0	0	1	0	1	0	1	1	0	0	0	0	1	1	0	0	1	1	0	1	0	1	0	0	0	0
TSMJ-22	TSMJ	0	1	1	0	0	0	1	1	0	1	0	0	0	1	1	1	0	1	0	1	1	0	0	0	1	0	1	0	1	1	0	0	0	0	1	1	0	0	1	1	0	1	1	1	0	1	0	0
TSMJ-23	TSMJ	1	1	1	1	0	0	1	0	0	0	0	0	0	0	1	1	0	1	0	1	1	0	0	0	1	0	1	0	1	1	0	0	0	0	1	1	0	0	1	1	0	1	1	1	0	0	0	0
PLJC-1	PLJC	0	0	1	0	0	0	1	1	0	0	0	0	0	1	1	1	0	1	0	1	1	0	0	0	1	0	1	1	1	1	0	0	0	0	1	1	0	1	0	1	0	1	1	1	0	0	0	0
PLJC-2	PLJC	0	1	1	0	0	0	1	0	1	0	0	1	0	0	1	1	0	1	0	1	0	0	0	0	1	0	1	0	1	1	0	0	0	1	1	1	0	1	0	1	0	1	1	1	0	0	0	0
PLJC-3	PLJC	0	1	1	0	0	0	1	0	0	0	0	0	0	0	1	1	0	1	1	1	1	0	0	0	1	0	0	0	1	1	0	0	0	0	1	1	0	0	1	1	0	1	0	1	0	1	0	0
PLJC-4	PLJC	0	1	1	0	0	0	1	0	0	0	0	0	0	0	1	1	1	1	0	1	1	0	0	0	0	0	1	0	0	0	0	0	0	1	1	1	0	0	1	1	0	1	1	1	0	0	0	0
PLJC-5	PLJC	1	1	1	1	0	0	1	0	0	0	0	0	0	0	1	1	0	1	1	0	1	0	1	1	1	0	1	0	1	1	0	0	0	0	0	0	1	0	1	1	0	1	1	0	0	1	0	0
PLJC-6	PLJC	0	1	1	0	0	0	1	0	0	0	0	1	0	1	0	0	0	1	0	1	1	0	0	0	1	0	1	0	1	1	0	0	1	0	1	1	0	0	1	1	0	1	1	1	0	0	0	0
PLJC-7	PLJC	0	1	0	0	1	0	1	0	0	0	0	0	0	0	1	1	0	1	0	1	1	0	0	0	1	0	1	0	1	1	1	0	0	0	1	1	0	1	0	1	0	0	1	1	0	1	0	0
PLJC-8	PLJC	1	1	1	0	0	0	1	0	1	1	0	0	0	1	1	1	0	1	0	1	1	0	1	0	1	0	1	1	1	1	0	0	0	0	0	1	1	0	1	0	0	1	1	1	0	0	0	0
PLJC-9	PLJC	0	1	1	0	0	0	0	0	0	0	0	0	0	0	1	1	0	1	0	1	1	0	0	0	0	0	1	0	1	1	0	0	0	0	1	1	0	1	0	1	0	1	1	1	0	0	0	0
PLJC-10	PLJC	1	1	1	0	0	0	1	0	1	0	0	0	0	0	1	1	0	0	0	1	1	0	0	0	1	0	1	1	1	1	0	0	0	0	1	1	0	0	1	1	0	1	1	1	0	1	1	1
PLJC-11	PLJC	0	1	1	1	0	0	1	0	0	0	1	0	0	0	0	1	0	1	0	1	0	0	0	0	1	1	0	0	1	0	0	1	1	1	1	1	0	0	1	1	1	1	1	1	1	0	0	0
PLJC-12	PLJC	0	1	1	0	0	0	1	1	0	0	0	0	1	0	1	1	0	1	1	1	1	0	0	0	1	0	1	0	1	1	0	0	0	0	1	1	0	0	1	0	0	1	1	1	0	0	0	0
PLJC-13	PLJC	1	0	0	0	0	0	1	0	0	1	0	0	0	1	1	0	1	1	0	1	1	1	0	0	0	0	1	0	1	1	0	0	0	1	1	1	0	1	0	1	0	1	0	1	0	0	0	0
PLJC-14	PLJC	0	0	1	0	0	0	1	0	0	0	0	0	0	1	1	1	0	1	0	1	1	0	0	0	1	0	1	0	1	1	0	0	0	0	1	0	0	0	1	1	0	1	1	1	0	0	0	0
PLJC-15	PLJC	0	1	1	0	1	0	1	1	0	0	0	0	0	1	1	1	0	1	0	1	1	0	0	0	1	0	1	0	1	1	0	0	0	1	1	1	0	1	0	1	0	1	1	1	0	1	0	0
PLJC-16	PLJC	0	0	1	0	1	0	1	0	1	0	1	1	0	0	1	1	0	1	0	1	1	0	0	0	1	0	1	1	1	1	0	0	0	1	1	1	0	0	0	1	0	1	1	1	0	0	0	0
QYXF-1	QYXF	0	0	1	0	1	0	1	0	0	1	0	0	0	1	1	1	0	1	0	1	1	0	0	0	1	0	1	0	1	1	0	0	1	1	1	1	0	1	0	1	0	1	1	1	0	0	0	0
QYXF-2	QYXF	0	0	1	1	0	0	1	0	1	0	1	0	0	0	1	1	0	1	1	1	1	0	0	0	1	0	1	0	1	1	0	0	0	0	1	1	0	0	1	1	0	1	1	1	0	0	0	0
QYXF-3	QYXF	0	1	0	1	0	0	0	0	0	0	0	1	0	1	1	1	0	1	0	1	1	0	0	1	1	0	1	0	1	1	1	0	1	0	1	1	0	0	1	0	0	1	1	1	1	0	1	0
QYXF-4	QYXF	0	1	1	0	0	0	1	0	0	0	1	0	1	0	1	1	0	1	0	1	1	0	1	0	0	0	1	0	1	1	0	0	0	0	1	0	1	0	1	1	0	1	1	1	0	0	0	0
QYXF-5	QYXF	1	1	1	0	0	0	1	1	0	1	0	1	0	0	0	0	0	1	0	1	1	1	0	0	1	1	1	1	1	0	0	0	0	0	0	1	0	1	0	1	0	1	1	1	1	1	0	0
QYXF-6	QYXF	0	1	1	1	0	0	1	0	0	0	0	0	0	0	1	1	1	1	0	1	0	0	0	0	0	0	0	0	0	1	0	1	0	0	1	1	0	0	1	1	1	1	1	0	0	1	0	0
QYXF-7	QYXF	0	1	0	0	0	0	1	0	0	0	0	0	0	1	1	1	0	0	1	0	1	0	0	0	1	0	1	0	1	1	0	0	0	0	1	1	0	1	0	1	0	0	0	1	0	0	0	1
QYXF-8	QYXF	0	1	1	0	1	0	1	0	0	1	1	0	0	0	1	1	0	1	0	1	1	0	0	0	1	0	1	0	1	1	0	0	0	1	1	1	0	0	1	1	0	1	1	1	0	0	0	0
QYXF-9	QYXF	0	1	1	0	0	0	1	0	0	0	0	0	0	0	1	1	0	1	0	1	1	0	0	0	1	0	1	1	1	1	0	0	0	1	1	1	0	0	1	1	0	1	1	1	0	0	0	0
PLLT-1	PLLT	0	0	1	0	0	0	1	1	0	1	0	0	0	0	1	1	0	1	1	1	1	0	0	0	1	0	1	1	1	1	0	0	0	0	1	1	0	1	1	1	0	1	1	1	0	0	0	0
PLLT-2	PLLT	0	1	0	1	0	0	1	0	0	0	0	0	0	0	1	1	0	1	0	1	1	0	0	0	1	0	1	0	1	1	0	0	1	0	1	0	0	0	1	1	0	1	1	1	0	1	0	0
PLLT-3	PLLT	0	1	1	0	0	0	1	1	0	0	0	0	1	0	0	1	0	1	0	1	1	0	0	0	0	0	1	0	1	1	0	0	0	0	1	1	0	0	1	1	0	1	1	1	0	0	0	0
PLLT-4	PLLT	0	1	1	0	0	0	1	0	0	0	0	0	0	0	0	1	0	1	1	1	1	0	0	0	1	0	1	0	1	1	1	1	0	1	0	1	0	0	0	1	0	0	1	1	0	0	0	0
PLLT-5	PLLT	0	1	0	0	0	0	0	0	0	1	1	0	0	0	1	0	0	0	0	1	0	0	0	0	0	0	1	1	1	1	0	0	0	0	1	1	0	0	1	1	0	1	0	1	0	0	0	1
PLLT-6	PLLT	0	1	1	0	0	0	1	0	0	0	0	0	0	0	1	1	0	1	0	0	1	1	0	0	1	1	1	0	0	0	0	0	0	0	1	0	1	0	1	1	1	0	1	1	0	1	0	0
PLLT-7	PLLT	1	1	1	0	0	0	1	0	0	0	1	0	0	1	1	1	0	1	0	1	1	0	0	0	1	0	1	0	1	1	0	0	0	0	1	1	0	1	0	0	0	1	1	0	1	0	0	0
PLLT-8	PLLT	0	1	1	0	0	0	1	1	1	0	0	0	1	0	1	1	1	1	0	1	1	0	1	0	1	0	0	0	1	1	0	1	1	1	1	1	0	0	1	1	0	0	1	1	0	0	1	0
PLLT-9	PLLT	0	1	1	0	1	0	1	0	0	0	0	1	0	0	1	1	0	1	0	1	1	0	0	0	1	1	1	0	1	0	1	0	0	0	1	1	0	0	1	1	0	1	1	1	0	0	0	0
PLLT-10	PLLT	1	1	0	0	0	0	0	0	0	1	0	0	0	0	1	0	0	0	0	0	0	0	0	1	1	0	1	0	0	1	0	0	0	0	1	1	0	0	1	0	0	1	1	1	0	1	0	0
PLLT-11	PLLT	0	0	1	0	1	0	1	0	1	0	0	0	0	0	1	1	0	1	0	1	1	0	0	0	1	0	1	0	1	1	0	0	1	0	1	1	0	0	1	1	0	1	1	1	0	0	0	0
PLLT-12	PLLT	0	1	1	1	0	0	1	0	0	0	0	0	0	0	1	1	0	1	1	1	1	0	0	0	1	0	1	0	1	1	0	0	0	0	1	1	0	0	0	1	0	1	1	1	0	0	0	0
PLLT-13	PLLT	0	1	1	0	0	0	1	0	0	0	0	0	0	0	1	1	0	1	0	1	1	0	0	0	1	0	1	0	1	1	0	0	0	0	1	1	0	0	1	1	0	1	1	1	0	0	0	0
QYNX-1	QYNX	0	1	1	0	0	0	1	1	0	0	0	0	0	0	0	1	0	0	0	1	1	0	0	0	1	0	1	0	1	1	0	0	0	0	1	1	0	1	1	1	0	1	1	1	0	0	0	0
QYNX-2	QYNX	0	1	1	0	0	0	1	0	0	0	0	0	0	0	1	1	0	1	0	1	1	0	0	0	1	0	1	0	1	1	0	0	0	0	1	1	0	0	1	1	0	1	1	1	0	0	0	0
QYNX-3	QYNX	0	1	1	1	0	0	1	0	1	0	0	0	0	1	1	1	0	1	0	1	1	0	0	0	1	0	1	0	1	1	0	0	1	0	0	1	0	1	1	1	0	1	1	1	0	1	0	0
QYNX-4	QYNX	0	1	1	0	1	0	1	0	0	0	0	0	0	0	1	1	0	1	0	0	1	0	0	0	1	0	0	1	1	1	0	0	0	0	1	0	0	0	0	1	0	1	1	1	0	0	0	0
QYNX-5	QYNX	0	1	1	1	0	0	1	0	0	0	0	1	0	0	1	1	1	1	0	1	1	0	0	0	1	0	1	0	1	1	0	0	0	0	1	1	0	0	1	1	0	1	1	1	0	0	0	0
QYNX-6	QYNX	0	1	0	0	0	0	1	0	0	0	0	0	0	1	1	1	0	1	0	1	1	0	0	0	1	1	0	0	1	1	0	1	1	0	1	1	0	0	1	1	0	1	1	0	0	0	0	0
QYNX-7	QYNX	0	1	1	0	0	0	0	1	0	0	0	0	1	0	1	0	0	1	0	1	1	0	0	0	1	0	1	0	1	1	0	0	0	0	1	1	0	0	0	1	0	0	1	1	0	0	0	0
QYNX-8	QYNX	0	1	1	0	0	0	1	0	0	0	0	0	0	0	1	1	0	1	0	1	0	1	0	1	1	0	1	1	1	0	0	0	0	1	1	1	1	0	1	1	0	1	1	1	0	1	0	0
QYNX-9	QYNX	1	1	1	1	0	0	1	0	0	0	0	0	0	0	1	1	0	1	0	1	0	0	0	0	1	0	1	0	0	1	1	0	0	0	1	1	0	1	1	0	0	0	1	1	0	0	0	0
QYNX-10	QYNX	0	0	0	0	0	0	1	0	1	0	0	0	0	1	1	1	0	0	1	1	1	0	0	0	1	0	0	0	1	1	0	0	0	0	1	1	0	0	1	1	0	1	1	1	0	0	0	0
QYNX-11	QYNX	0	1	1	0	0	0	1	0	0	1	0	0	0	0	1	1	0	1	0	1	1	0	0	0	1	0	1	0	1	1	0	0	0	1	1	1	0	0	1	1	1	0	1	0	0	0	0	0
QYNX-12	QYNX	0	1	1	1	0	0	1	0	0	0	0	0	0	0	1	1	0	1	0	1	1	1	1	0	1	0	1	1	1	1	0	0	0	0	1	1	0	0	1	0	0	1	1	1	1	0	1	0
QYNX-13	QYNX	1	1	1	0	0	0	1	0	0	0	0	0	0	1	1	1	0	1	1	1	0	0	0	0	0	1	1	0	1	1	0	0	0	0	1	1	0	0	0	1	0	1	1	0	0	0	0	0
QYNX-14	QYNX	0	1	1	0	0	0	0	0	0	0	1	0	1	0	1	1	0	1	0	0	1	0	0	0	1	0	0	0	1	1	0	0	0	0	1	1	0	1	1	1	0	1	0	1	0	0	0	0
QYNX-15	QYNX	0	0	1	0	0	0	1	0	1	0	0	0	0	0	0	0	0	1	0	1	1	0	0	0	1	0	1	0	1	1	1	0	0	0	1	1	0	0	1	1	0	1	1	1	0	1	0	0
QYNX-16	QYNX	0	1	1	1	1	0	1	0	0	0	0	0	0	0	1	1	0	1	0	1	1	1	0	0	0	0	0	0	1	1	0	0	1	0	1	1	0	0	1	1	1	0	1	1	0	0	0	0
QYNX-17	QYNX	0	1	1	1	0	0	1	0	0	0	0	0	0	0	1	1	0	1	0	1	1	0	0	0	1	0	1	0	1	1	0	0	0	0	1	1	0	0	1	1	0	1	1	1	0	0	0	1
QYNX-18	QYNX	0	1	1	0	0	0	1	0	0	0	1	0	0	0	1	1	0	1	0	1	1	0	0	0	1	0	1	0	1	1	1	0	0	0	0	0	0	1	1	1	0	1	1	0	0	0	0	0
QYNX-19	QYNX	0	1	1	1	1	0	1	0	0	0	0	0	0	0	1	1	0	0	0	1	1	0	0	0	1	0	0	0	1	1	0	0	0	0	1	1	0	0	1	1	0	1	1	1	0	0	0	0
QYNX-20	QYNX	0	1	1	0	0	0	1	0	0	0	1	0	0	0	1	1	1	1	0	1	1	0	0	1	1	0	1	0	1	1	0	0	0	1	1	1	1	1	0	1	0	1	1	1	0	0	0	0
QYNX-21	QYNX	0	1	1	0	0	0	0	0	0	0	0	0	1	0	1	1	0	1	0	1	1	1	1	0	1	0	1	0	1	1	0	1	0	0	1	1	0	0	1	1	0	1	1	1	0	0	0	0
QYNX-22	QYNX	1	1	1	0	1	0	1	0	0	1	0	0	0	0	1	1	0	1	1	1	1	0	0	0	1	1	1	1	1	1	0	0	0	0	1	1	0	1	1	1	0	1	1	1	0	0	0	0
QYNX-23	QYNX	0	0	1	0	0	0	1	0	0	0	0	0	0	0	1	1	0	1	0	1	1	1	0	0	1	0	1	0	0	1	0	0	0	0	1	1	0	0	1	1	0	0	1	1	0	1	0	0
QYNX-24	QYNX	0	1	1	0	0	0	1	1	1	0	1	0	0	0	1	1	0	1	0	0	1	0	0	0	1	0	1	0	1	1	0	0	0	0	1	1	0	1	1	1	0	1	1	1	0	0	0	0
QYNX-25	QYNX	0	1	1	0	0	0	1	0	0	0	0	0	0	0	0	0	0	1	0	1	1	0	0	0	1	0	1	0	1	1	0	0	0	1	1	1	0	0	1	1	0	1	1	1	0	0	0	0
QYNX-26	QYNX	1	1	1	1	1	0	1	0	0	0	0	0	0	0	1	1	0	1	0	1	1	0	0	0	1	0	1	0	1	1	0	0	0	0	1	1	0	1	1	1	0	1	1	1	0	0	0	0
[truncated: 254 more columns]
